# Supplementary material for: The microRNA-29/PGC1α regulatory axis is critical for metabolic control of cardiac function
Source: PubMed Central journal article supplement (PMC6211751; doi:10.1371/journal.pbio.2006247), 2018-10-22

# Supplementary Figure 17

**a**

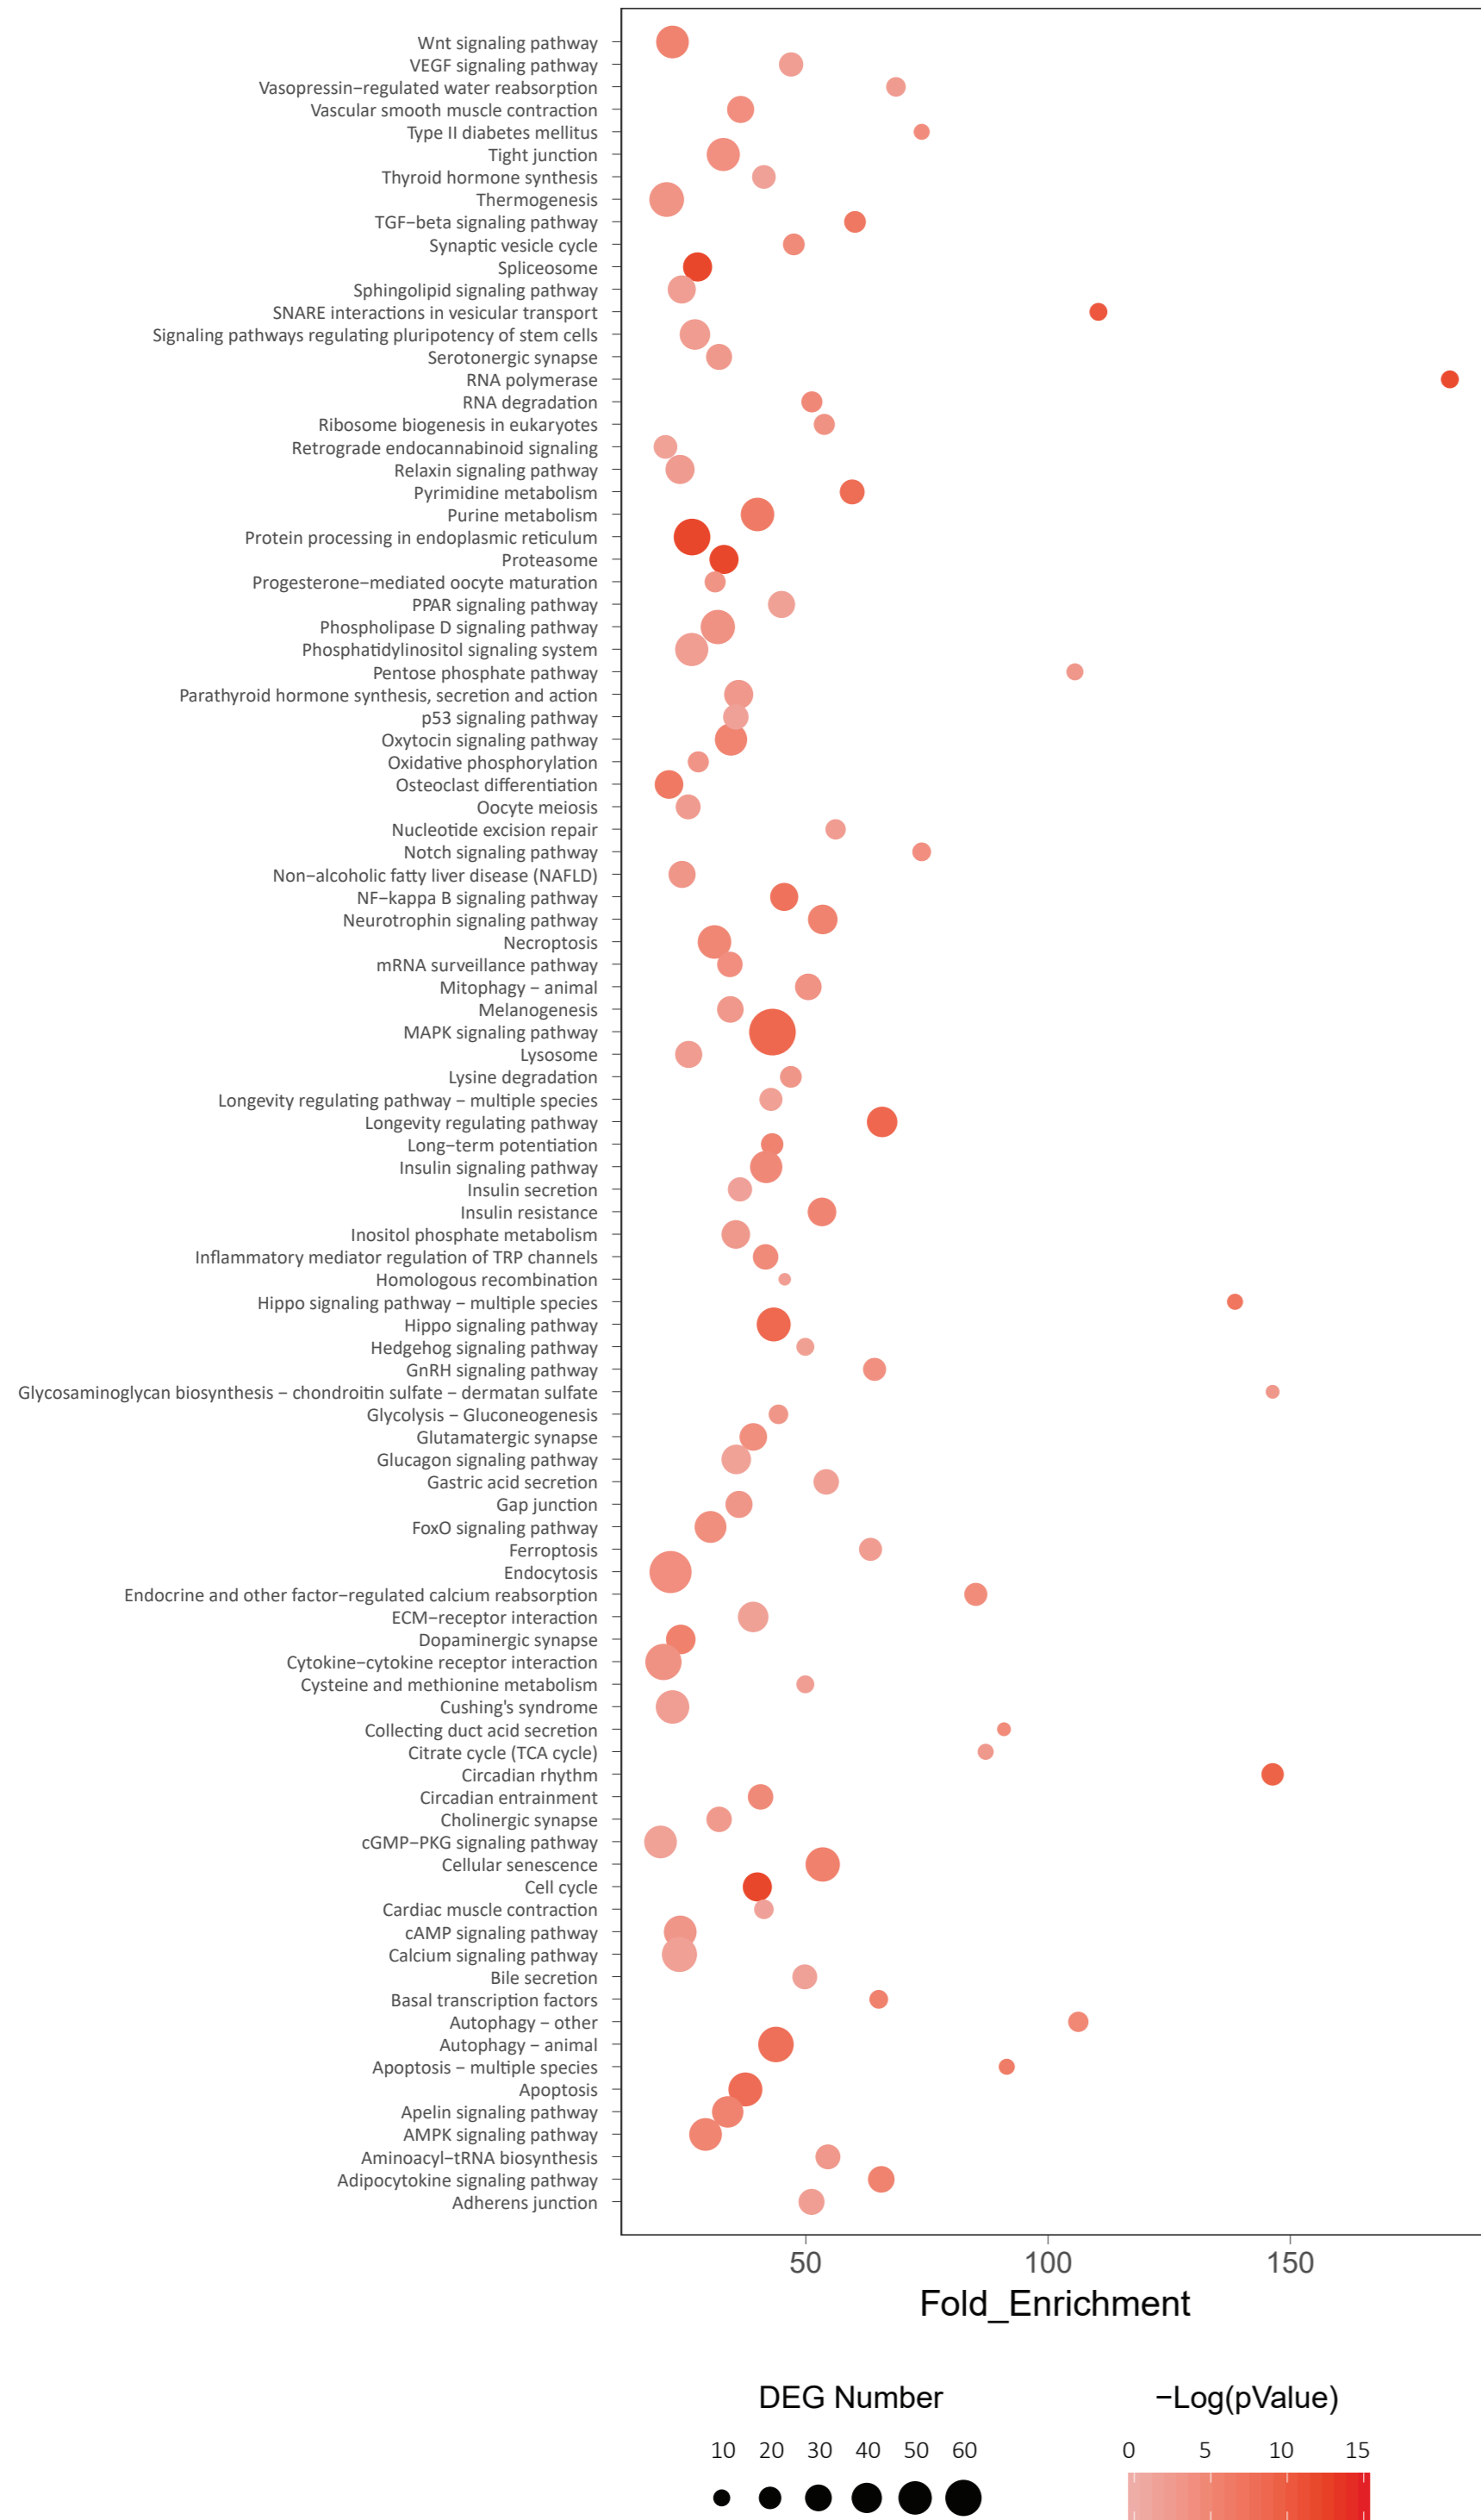

**b**

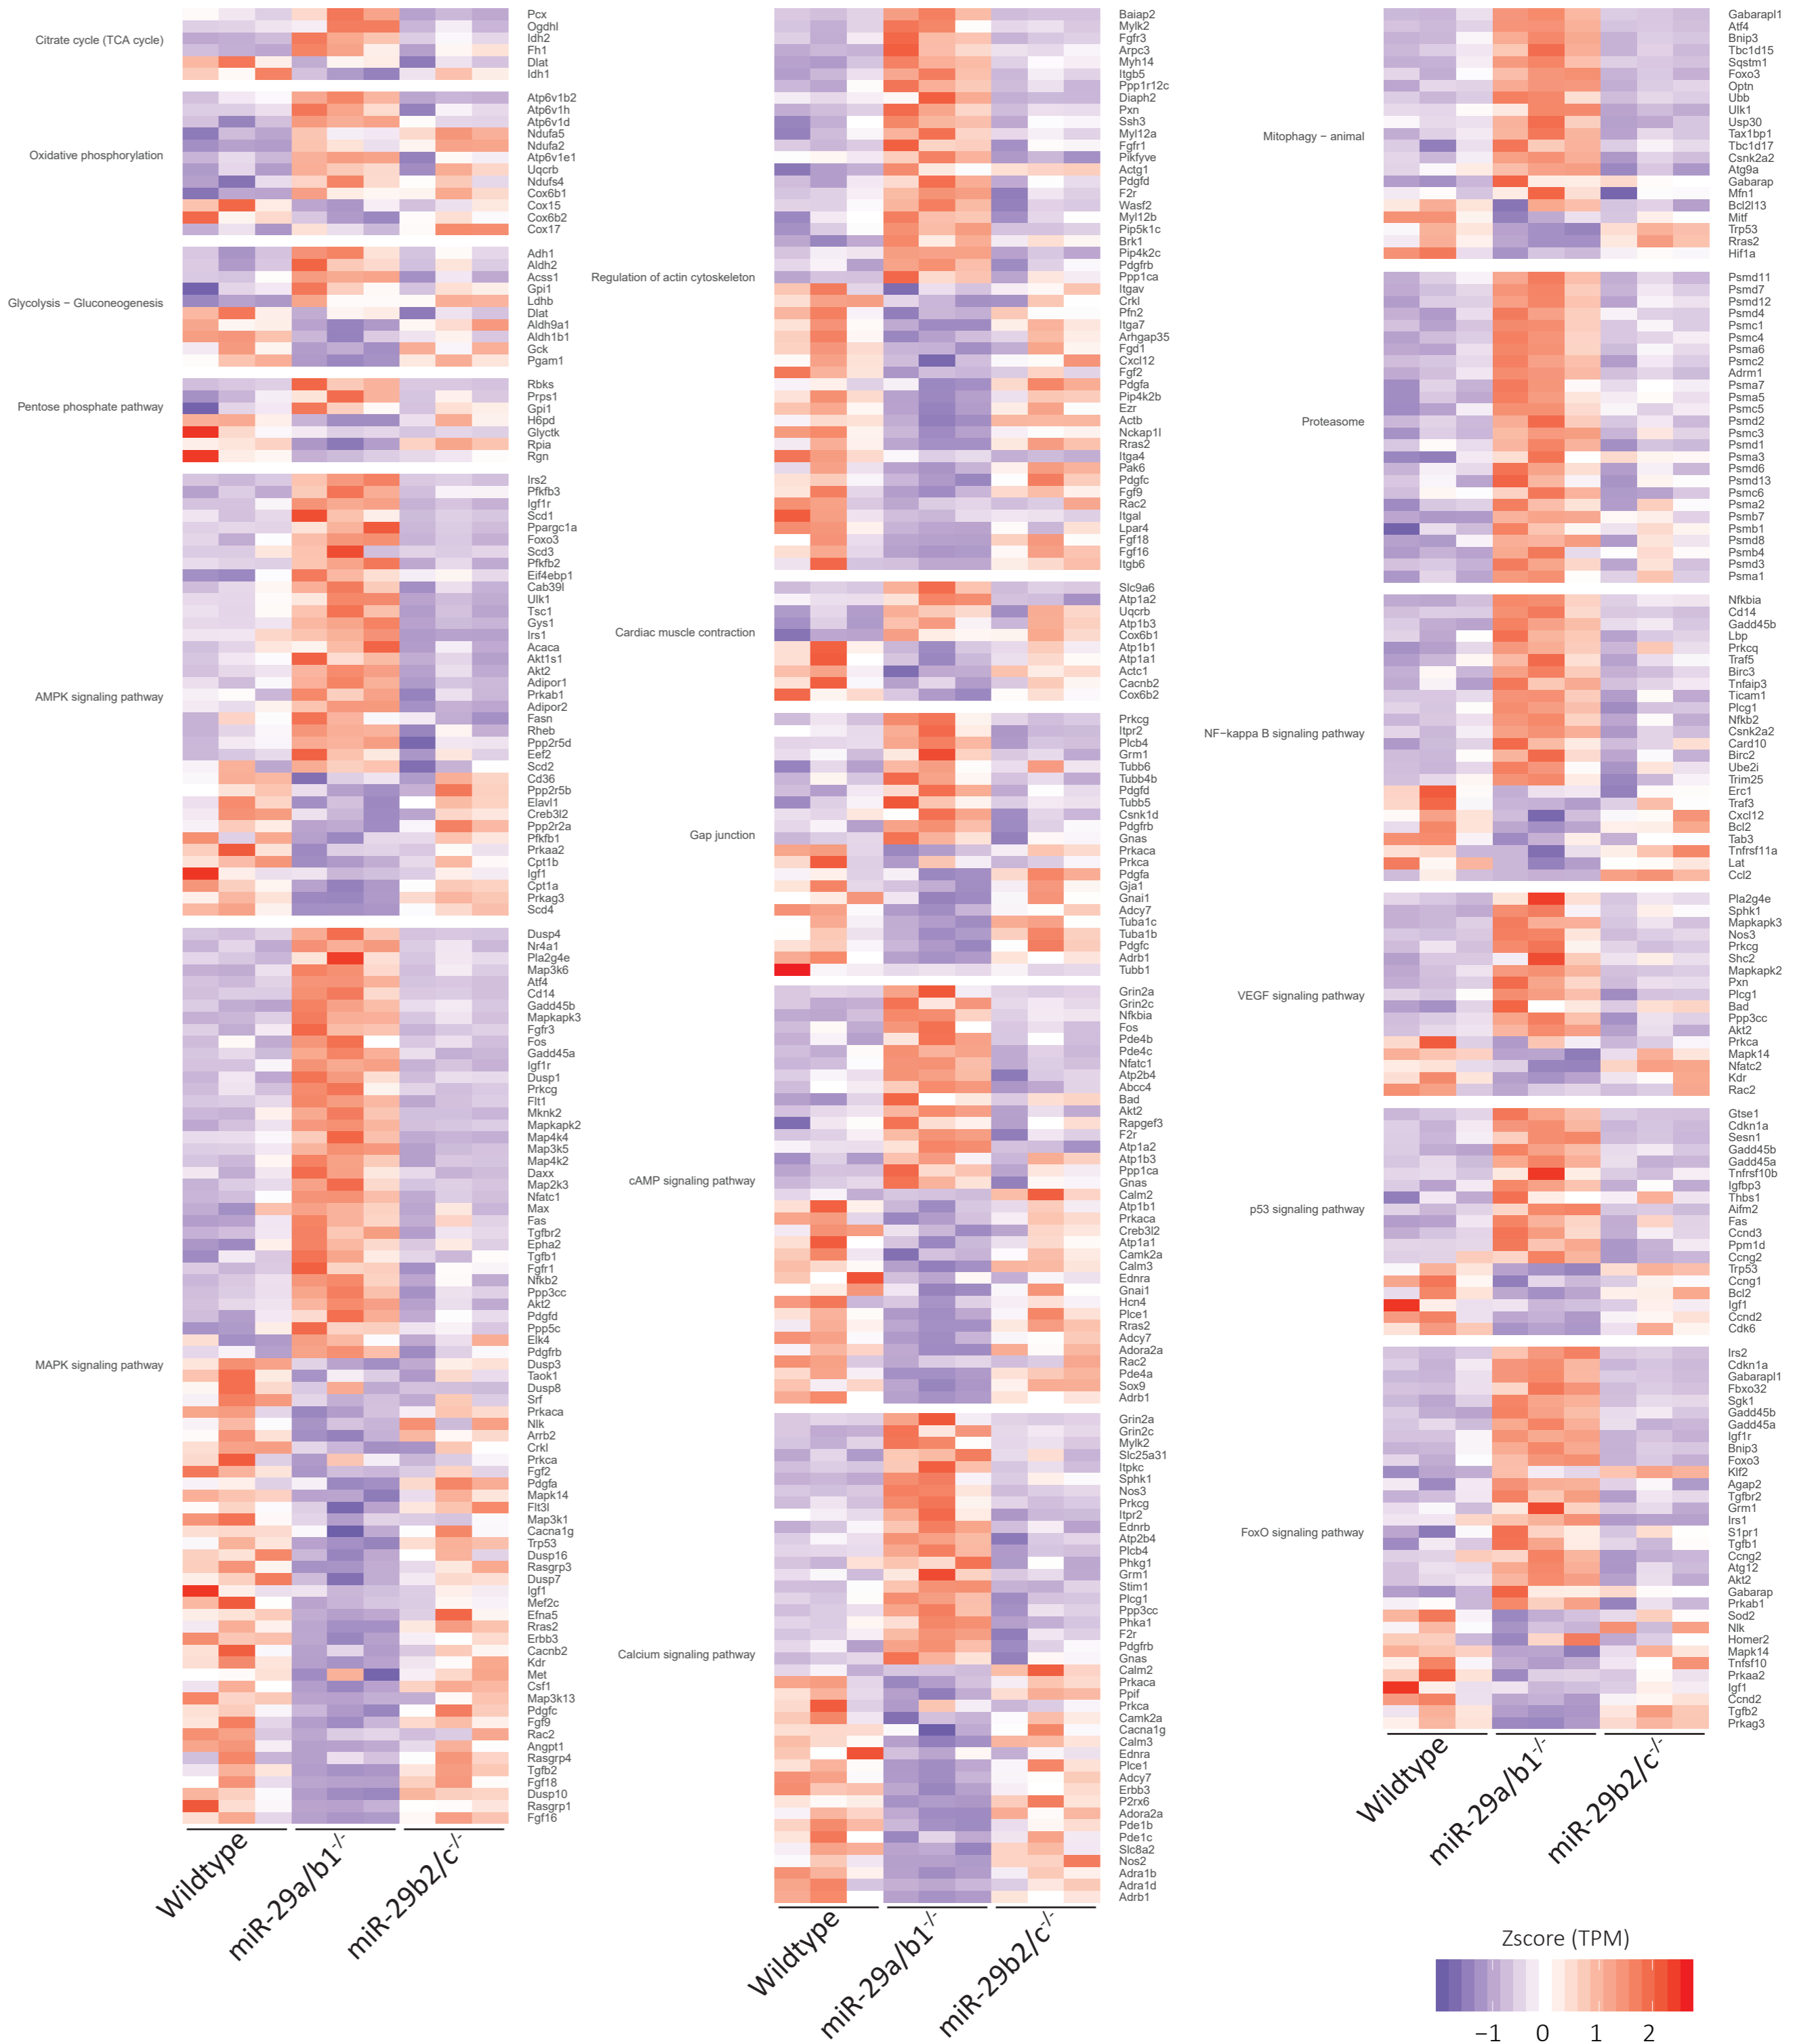

Supplement: pbio.2006247.s017.pdf [file pbio.2006247.s017.pdf]
