# Supplementary material for: The microRNA-29/PGC1α regulatory axis is critical for metabolic control of cardiac function
Source: PLoS Biol. 2018 Oct 22;16(10):e2006247. doi: 10.1371/journal.pbio.2006247 (PMC6211751; doi:10.1371/journal.pbio.2006247)
Supplement: S1 Table — Full list of differentially expressed genes (adjusted p-value < 0.05) in miR-29a/b1−/− or miR-29c/b2−/− compared with wild-type mice, indicating the number of conserved miR-29 binding sites, if applicable. (XLSX) [file pbio.2006247.s020.xlsx]

## Sheet: Supplementary Table S1
# Genes differentially regulated in transcriptome analysis from miR-29a/b1 and miR-29c/b2 mutant mice
# Conserved_miR-29-BS: Number of conserved miR-29 binding sites according to TargetScan (NA: not applicable)
# log2FoldChangeKOAvsWT: Log2 fold change gene expression in miR29a/b1 deficient mice compared to wildtype
# padjKOAvsWT: DESeq2 adjusted p-value for the comparison between miR-29a/b1-null and wildtype mice
# log2FoldChangeKOCvsWT: Log2 fold change gene expression in miR29b2/c deficient mice compared to wildtype
# padjKOCvsWT: DESeq2 adjusted p-value for the comparison between miR-29b2/c-null and wildtype mice
ENSEMBL_ID	SYMBOL	Conserved_miR-29-BS	log2FoldChangeKOAvsWT	padjKOAvsWT	log2FoldChangeKOCvsWT	padjKOCvsWT
ENSMUSG00000054200.6	Ffar4	NA	8.28232	2.00772e-09	-1.00254	0.788164
ENSMUSG00000034739.17	Mfrp	NA	7.94101	2.54794e-08	1.81049	0.552435
ENSMUSG00000089989.10	RP24-235B15.9	NA	7.00742	6.67021e-06	-0.0409215	0.993362
ENSMUSG00000071104.10	Ccdc110	NA	6.67419	0.000329772	-0.040924	0.993766
ENSMUSG00000054146.8	Krt15	NA	6.65617	0.000239523	-0.0409235	0.993577
ENSMUSG00000031710.4	Ucp1	NA	6.42368	0.00145391	0.828042	0.858508
ENSMUSG00000061527.7	Krt5	NA	6.38783	0.000707993	-0.0409236	NA
ENSMUSG00000071036.2	Gm10309	NA	6.37683	1.1458e-17	-0.843904	0.675167
ENSMUSG00000039057.11	Myo16	NA	6.07768	1.77736e-08	-1.53193	0.608154
ENSMUSG00000015652.9	Steap1	NA	5.97173	0.000728277	1.8268	NA
ENSMUSG00000075112.2	Olfr1211	NA	5.74792	0.00387361	-0.040923	NA
ENSMUSG00000115293.1	RP23-101H1.18	NA	5.73277	0.00189889	4.25578	NA
ENSMUSG00000058354.7	Krt6a	NA	5.65714	0.0128018	-0.0409257	NA
ENSMUSG00000074673.15	Ttll9	NA	5.63946	0.000677089	2.66666	0.289859
ENSMUSG00000058084.5	Olfr825	NA	5.42024	0.0112599	2.76718	NA
ENSMUSG00000061482.7	Hist1h4d	NA	5.36228	5.13269e-08	-0.782202	0.762989
ENSMUSG00000027840.5	Wnt2b	NA	5.23081	0.00186238	5.50505	NA
ENSMUSG00000034362.7	Csta1	NA	5.07484	0.0111219	-0.769331	NA
ENSMUSG00000063163.13	Speer2	NA	4.98984	0.000718131	-1.8761	0.566426
ENSMUSG00000058925.11	AC102232.1	NA	4.97805	1.14363e-10	1.52361	0.208351
ENSMUSG00000064177.8	Ghrl	NA	4.96392	0.00931902	4.01226	NA
ENSMUSG00000021797.2	RP23-251L22.2	NA	4.96335	0.0060904	-0.049977	NA
ENSMUSG00000059873.4	Olfr1029	NA	4.83754	0.00790813	2.02811	NA
ENSMUSG00000096010.2	Hist4h4	NA	4.6538	6.43887e-06	-1.93855	0.467623
ENSMUSG00000036826.14	Igflr1	NA	4.65273	0.0280114	5.52299	NA
ENSMUSG00000074359.2	Psg23	NA	4.55738	0.0177111	1.44269	NA
ENSMUSG00000042567.20	Nek10	1	4.55507	2.74912e-05	-0.640868	0.815491
ENSMUSG00000031027.15	Stk33	NA	4.53837	0.0112137	1.55587	NA
ENSMUSG00000028865.14	Cd164l2	NA	4.49882	0.00503738	1.50131	NA
ENSMUSG00000025064.14	Col17a1	NA	4.49532	0.00846304	1.44217	0.630062
ENSMUSG00000016524.12	Il19	NA	4.44241	0.00431394	-2.12414	0.510999
ENSMUSG00000022824.12	Muc13	NA	4.41081	3.65026e-18	-0.714829	0.565115
ENSMUSG00000047518.3	Slfnl1	NA	4.34768	0.0321317	0.825009	NA
ENSMUSG00000047528.13	Als2cr12	NA	4.3375	0.0436057	1.07325	NA
ENSMUSG00000095187.2	Olfr1381	NA	4.30079	0.0352579	2.45848	NA
ENSMUSG00000048572.4	Tmem252	NA	4.29796	1.10035e-06	1.37312	0.337468
ENSMUSG00000022878.5	Adipoq	NA	4.28676	0.044052	3.78509	NA
ENSMUSG00000027350.8	Chgb	NA	4.23305	7.17392e-07	1.54091	0.236304
ENSMUSG00000060678.5	Hist1h4c	NA	4.13278	8.66695e-05	0.950865	0.645207
ENSMUSG00000019992.8	Mtfr2	NA	4.06197	2.89037e-12	0.835638	0.422075
ENSMUSG00000051435.11	Fhad1	NA	4.01236	4.16587e-07	-1.11864	0.498424
ENSMUSG00000062061.3	Obp2a	NA	3.87828	0.0161418	1.29215	NA
ENSMUSG00000030270.11	Cpne9	NA	3.83711	0.0249643	1.17189	NA
ENSMUSG00000035455.12	Fignl1	NA	3.82106	0.0362814	4.7385	NA
ENSMUSG00000032013.6	Trim29	NA	3.77787	0.0243363	1.81402	NA
ENSMUSG00000044991.10	RP23-391A14.5	NA	3.76879	4.70906e-33	0.277828	0.644884
ENSMUSG00000025475.17	Adgra1	NA	3.74165	0.0359345	0.878541	NA
ENSMUSG00000091275.1	RP23-314N18.4	NA	3.69971	0.0012698	1.75382	0.303423
ENSMUSG00000029671.15	Wnt16	NA	3.69191	0.000796644	-1.37209	0.61331
ENSMUSG00000059003.12	Grin2a	NA	3.67535	1.29918e-05	0.20292	0.925432
ENSMUSG00000017697.3	Ada	NA	3.61605	2.09826e-12	0.842394	0.336046
ENSMUSG00000028211.11	Trp53inp1	1	3.60298	1.14763e-31	-0.886187	0.0338584
ENSMUSG00000032899.14	Styk1	NA	3.49079	0.018816	1.08309	0.668757
ENSMUSG00000048003.12	Catsper4	NA	3.48662	0.00601108	1.91901	0.285407
ENSMUSG00000078307.3	RP23-35N23.2	NA	3.47668	1.72357e-12	1.17268	0.0850046
ENSMUSG00000028341.9	Nr4a3	NA	3.40763	3.48762e-08	1.00121	0.270613
ENSMUSG00000000903.3	Vpreb3	NA	3.39863	0.00351136	-0.509127	0.854987
ENSMUSG00000049985.15	Ankrd55	NA	3.37461	3.42652e-12	1.21041	0.0781844
ENSMUSG00000111409.1	RP24-329C11.10	NA	3.37358	0.000136885	-0.57672	0.774477
ENSMUSG00000024042.6	Sik1	NA	3.3723	1.01567e-66	0.824392	0.000708138
ENSMUSG00000026826.13	Nr4a2	NA	3.35749	3.2854e-08	-0.52534	0.648401
ENSMUSG00000004902.7	Slc25a18	NA	3.34876	0.00013626	2.58886	0.0143211
ENSMUSG00000040485.5	Lrrc52	NA	3.34261	4.59354e-18	-0.602048	0.386674
ENSMUSG00000057716.6	Tmem178b	1	3.33758	2.06052e-06	0.494523	0.710686
ENSMUSG00000043164.3	Tmem212	NA	3.33044	0.0286788	-2.48031	NA
ENSMUSG00000051509.6	Olfr414	NA	3.31829	0.0299324	0.745771	0.79752
ENSMUSG00000084897.1	RP23-192A6.2	NA	3.31026	9.471e-08	-0.435365	0.708764
ENSMUSG00000073209.4	Klf14	NA	3.30497	0.00138608	-0.524384	0.828739
ENSMUSG00000020434.4	RP23-128G5.3	NA	3.29949	1.96926e-16	-0.355815	0.709711
ENSMUSG00000024903.10	Lao1	NA	3.29516	0.0408551	-1.83487	NA
ENSMUSG00000049892.7	Rasd1	NA	3.26648	1.80347e-36	0.557755	0.182714
ENSMUSG00000020108.4	Ddit4	NA	3.25803	2.45821e-35	1.06946	0.000921691
ENSMUSG00000068232.3	Vmn1r42	NA	3.24622	0.00244153	-0.147868	0.96009
ENSMUSG00000058975.7	Kcnc1	NA	3.24283	3.66777e-10	-0.896334	0.324614
ENSMUSG00000035506.16	Slc12a8	NA	3.23207	2.83101e-06	0.0867456	0.963233
ENSMUSG00000096045.7	RP23-56M18.1	NA	3.22583	0.0253239	-0.572568	NA
ENSMUSG00000026018.12	Ica1l	NA	3.21927	0.0368698	-0.462447	NA
ENSMUSG00000035896.5	Rnase1	NA	3.19668	1.56949e-13	1.0686	0.0700461
ENSMUSG00000020848.7	Doc2b	NA	3.18919	4.43989e-08	-0.949686	0.320969
ENSMUSG00000028358.15	Zfp618	NA	3.18233	0.041379	-0.760844	0.780081
ENSMUSG00000101904.1	RP24-87I22.3	NA	3.1713	4.06594e-21	0.42226	0.498424
ENSMUSG00000041930.7	Fam222a	NA	3.1533	5.53854e-15	-0.697982	0.395145
ENSMUSG00000026840.14	Lamc3	NA	3.1474	3.89152e-05	0.871466	0.512155
ENSMUSG00000067698.4	RP24-162F23.8	NA	3.12761	2.23711e-07	-1.62869	0.163684
ENSMUSG00000028982.9	Slc25a33	NA	3.1087	1.80128e-32	0.377804	0.389782
ENSMUSG00000006724.12	Cyp27b1	NA	3.09756	0.0158612	0.152735	NA
ENSMUSG00000038751.5	Ptk6	NA	3.06849	0.00120127	0.754242	0.667533
ENSMUSG00000096436.3	Olfr1437	NA	3.06211	0.000684719	-1.0437	0.61012
ENSMUSG00000020734.13	Grin2c	NA	3.05716	8.59846e-10	1.44883	0.0255564
ENSMUSG00000030713.6	Klk7	NA	3.03911	0.0483772	-0.023682	NA
ENSMUSG00000030162.14	Olr1	NA	3.03338	0.00178498	-0.15097	0.949492
ENSMUSG00000038894.7	Irs2	NA	3.01745	2.9531e-24	0.366235	0.473419
ENSMUSG00000104824.1	RP23-56M18.5	NA	3.01261	0.00017384	-1.86788	0.238954
ENSMUSG00000091956.2	C2cd4b	NA	3.01209	0.00916463	1.65094	0.320541
ENSMUSG00000009114.17	RP23-280M4.1	NA	2.99869	0.00195579	0.259881	0.899177
ENSMUSG00000035394.11	Cfap53	NA	2.98322	6.77529e-07	-0.835267	0.468739
ENSMUSG00000025372.16	Baiap2	NA	2.96537	2.59559e-26	-0.631337	0.128421
ENSMUSG00000071192.5	Wfikkn1	NA	2.95543	0.000155371	-0.783012	0.630011
ENSMUSG00000024795.11	Kif20b	NA	2.93732	3.45447e-06	-0.621071	0.598868
ENSMUSG00000030235.17	Slco1c1	NA	2.93674	0.000399059	0.474317	0.780138
ENSMUSG00000039313.14	RP23-407B23.1	NA	2.93316	0.000191425	-0.889216	0.574215
ENSMUSG00000029136.9	Rbks	NA	2.93059	5.70951e-17	0.071647	0.93851
ENSMUSG00000031530.6	Dusp4	NA	2.92015	3.9568e-20	-0.126897	0.864904
ENSMUSG00000045094.7	Arhgef37	NA	2.91297	1.0056e-28	-0.799484	0.032808
ENSMUSG00000028834.13	Trim63	1	2.9116	1.07211e-43	-0.0819272	0.861361
ENSMUSG00000050558.13	Prokr2	NA	2.9099	2.68809e-06	-1.3121	0.276176
ENSMUSG00000020892.10	Aloxe3	NA	2.8719	0.000668254	-0.216683	0.919247
ENSMUSG00000027470.9	Mylk2	NA	2.8693	0.000299614	0.896823	0.502464
ENSMUSG00000027313.3	Chac1	NA	2.86787	1.8907e-10	0.940167	0.136469
ENSMUSG00000056531.11	Ccdc18	NA	2.84779	0.0452231	0.101686	NA
ENSMUSG00000031762.7	Mt2	NA	2.82698	0.000246888	1.19749	0.268779
ENSMUSG00000073876.3	Il11ra2	NA	2.79634	1.83918e-06	0.72779	0.499786
ENSMUSG00000055978.5	Fut2	NA	2.7926	1.56495e-10	0.0968691	0.928028
ENSMUSG00000022385.11	Gtse1	NA	2.7807	1.79454e-05	0.047695	0.97885
ENSMUSG00000091049.8	RP24-162F23.1	NA	2.75292	0.0131432	-1.92919	0.35211
ENSMUSG00000073530.11	Pappa2	NA	2.74984	0.0155152	0.92016	0.623372
ENSMUSG00000090125.3	Pou3f1	NA	2.73737	0.0214901	1.09078	0.580198
ENSMUSG00000040298.6	Btbd16	NA	2.73342	1.02422e-05	-0.502967	0.697105
ENSMUSG00000079362.5	RP23-329M7.3	NA	2.72106	6.39294e-05	-0.0814252	0.961491
ENSMUSG00000024056.9	Ndc80	NA	2.71728	0.0453943	1.15433	NA
ENSMUSG00000001627.12	Ifrd1	NA	2.71446	1.63748e-93	0.150707	0.540658
ENSMUSG00000041477.14	Dcp1b	NA	2.70986	4.97882e-16	0.306693	0.629131
ENSMUSG00000101750.3	Olfr1392	NA	2.69266	0.020091	-1.21254	0.618902
ENSMUSG00000009092.5	Derl3	NA	2.66546	0.0232281	1.04043	0.600536
ENSMUSG00000054582.4	Pabpc1l	NA	2.65775	0.00074275	0.835429	0.545635
ENSMUSG00000048327.6	Ckap2l	NA	2.65463	0.00018956	1.07529	0.32413
ENSMUSG00000028836.14	Slc30a2	NA	2.64404	0.000846798	-0.817125	0.628002
ENSMUSG00000029757.16	Dync1i1	NA	2.63581	0.0244198	1.06283	0.58237
ENSMUSG00000028794.13	A3galt2	NA	2.62888	3.03288e-05	0.351334	0.787813
ENSMUSG00000090291.2	Lrrc10b	NA	2.62184	2.01801e-05	-1.22682	0.267287
ENSMUSG00000031997.9	Trpc6	NA	2.61259	0.00771671	-0.0425275	0.986848
ENSMUSG00000022129.4	Dct	NA	2.61085	4.02204e-10	0.468751	0.523186
ENSMUSG00000014813.9	Stc1	NA	2.60925	1.63542e-05	1.22675	0.135021
ENSMUSG00000042812.5	Foxf1	NA	2.59664	0.00063759	-0.0538882	0.979023
ENSMUSG00000068015.8	Lrch1	NA	2.58416	1.63136e-06	-1.16396	0.104784
ENSMUSG00000031766.4	Slc12a3	NA	2.58107	1.79485e-12	-0.570771	0.34403
ENSMUSG00000042622.14	Maff	NA	2.54644	3.22495e-18	0.267819	0.629786
ENSMUSG00000029321.1	Slc10a6	NA	2.53286	3.29565e-11	0.902167	0.0807689
ENSMUSG00000026073.13	Il1r2	NA	2.50278	0.0307511	-1.27259	0.568867
ENSMUSG00000109398.2	RP23-143D11.2	NA	2.49875	0.00270388	1.03504	0.42736
ENSMUSG00000071350.12	Setdb2	NA	2.49225	5.0342e-18	-0.574231	0.214006
ENSMUSG00000032515.8	Csrnp1	NA	2.48905	6.76526e-40	0.384388	0.175548
ENSMUSG00000028862.6	Map3k6	NA	2.4882	0.000206667	0.631047	0.571782
ENSMUSG00000046101.16	Mcmdc2	NA	2.48226	0.00134644	-0.857416	0.528629
ENSMUSG00000020593.15	Lpin1	NA	2.46642	1.07359e-17	-0.883323	0.0165653
ENSMUSG00000033022.7	Cdo1	NA	2.44768	0.00100795	-1.81937	0.0456176
ENSMUSG00000031972.5	Acta1	NA	2.43722	6.86026e-07	1.25496	0.0439543
ENSMUSG00000069041.8	Slc25a31	NA	2.42498	0.0180074	1.27993	0.396872
ENSMUSG00000091405.2	Hist2h4	NA	2.40087	0.00331814	-0.630537	0.715063
ENSMUSG00000029086.15	Prom1	NA	2.394	1.16944e-09	1.04674	0.0578661
ENSMUSG00000024529.13	Lox	2	2.39134	1.04042e-12	-0.625915	0.208767
ENSMUSG00000021097.15	Clmn	1	2.39069	1.12553e-12	-0.274091	0.669045
ENSMUSG00000005413.8	Hmox1	NA	2.38882	0.012582	0.64411	0.688759
ENSMUSG00000021965.3	Ska3	NA	2.37397	0.0441691	0.470035	0.833221
ENSMUSG00000031765.8	Mt1	NA	2.37248	0.000112166	0.712909	0.456187
ENSMUSG00000036545.8	Adamts2	2	2.37038	8.61713e-12	-0.259919	0.691962
ENSMUSG00000027956.11	Tmem144	NA	2.36966	4.59354e-18	-0.17539	0.747265
ENSMUSG00000025489.5	Ifitm5	NA	2.35486	0.0110893	1.58545	0.193895
ENSMUSG00000040084.9	Bub1b	NA	2.35061	0.000683245	0.58661	0.630574
ENSMUSG00000068231.5	Vmn1r43	NA	2.34513	0.0356604	-0.352006	0.87762
ENSMUSG00000050211.14	Pla2g4e	NA	2.33082	6.41689e-09	0.566494	0.363987
ENSMUSG00000037621.8	Atoh8	NA	2.32052	1.12638e-12	0.51172	0.308793
ENSMUSG00000021477.9	Ctsl	NA	2.31884	2.37974e-25	-0.250584	0.522702
ENSMUSG00000030528.12	Blm	NA	2.30162	3.30138e-05	-1.3201	0.0787403
ENSMUSG00000024912.5	Fosl1	NA	2.29363	0.0477442	2.40039	0.0726964
ENSMUSG00000104713.4	Gbp6	NA	2.28667	1.11698e-20	-1.60903	4.04983e-09
ENSMUSG00000052117.5	RP23-334A5.4	NA	2.28657	0.000356837	-0.441233	0.734055
ENSMUSG00000023034.7	Nr4a1	NA	2.28419	1.13677e-13	0.523952	0.252274
ENSMUSG00000041423.16	Paqr6	NA	2.25888	8.46623e-05	-0.00332841	0.998101
ENSMUSG00000032712.16	RP23-214L4.1	NA	2.25442	3.40117e-13	0.448631	0.355039
ENSMUSG00000021750.15	Fam107a	NA	2.2524	0.0181862	-0.445939	0.793564
ENSMUSG00000056602.11	Fry	NA	2.24718	9.05006e-25	0.0331044	0.952876
ENSMUSG00000030087.11	Klf15	NA	2.24655	3.06751e-21	-0.222148	0.616587
ENSMUSG00000027831.9	Veph1	NA	2.24419	0.0272246	-1.08729	0.555523
ENSMUSG00000093985.7	RP23-304L22.3	NA	2.23939	0.00538907	0.177973	0.926627
ENSMUSG00000075012.4	Fjx1	NA	2.22998	0.000164392	0.830721	0.36925
ENSMUSG00000035459.17	Stab2	NA	2.22283	1.71164e-20	-0.141305	0.79201
ENSMUSG00000031889.9	AC124713.2	NA	2.21098	2.33517e-12	-0.479964	0.325873
ENSMUSG00000036030.9	Prtg	NA	2.20674	0.0446345	0.346331	0.865031
ENSMUSG00000039911.13	Spsb1	NA	2.20522	6.01856e-24	1.4639e-05	0.999944
ENSMUSG00000079049.9	Serpinb1c	NA	2.19772	0.00230762	1.56345	0.0888354
ENSMUSG00000028214.13	Gem	NA	2.19607	9.62286e-13	0.614204	0.182592
ENSMUSG00000025432.11	Avil	NA	2.19132	7.51221e-08	1.00084	0.0621318
ENSMUSG00000029134.14	Plb1	NA	2.19053	5.35174e-05	1.05054	0.166643
ENSMUSG00000023067.13	Cdkn1a	NA	2.19005	0.000178064	-0.69295	0.443113
ENSMUSG00000028841.14	Cnksr1	NA	2.17615	1.78524e-16	0.720707	0.0398316
ENSMUSG00000031770.16	Herpud1	NA	2.17047	1.80884e-17	-0.0279971	0.966979
ENSMUSG00000021879.13	Dnah12	NA	2.16433	8.13074e-05	-0.880788	0.34297
ENSMUSG00000032611.9	RP23-448A11.15	NA	2.16076	0.0330187	1.20978	0.411596
ENSMUSG00000071324.11	Armc2	NA	2.15157	2.81332e-46	0.0658496	0.847577
ENSMUSG00000114212.1	RP23-393I20.2	NA	2.14922	0.0241035	0.0859296	0.970422
ENSMUSG00000026628.13	Atf3	NA	2.14837	1.10995e-09	0.771908	0.110772
ENSMUSG00000024210.2	Ip6k3	NA	2.13437	2.91784e-08	0.579451	0.33
ENSMUSG00000044505.5	Lingo4	NA	2.12774	0.0385397	0.52906	0.784376
ENSMUSG00000053719.10	Egfbp2	NA	2.12673	2.25667e-05	-0.0976886	0.934823
ENSMUSG00000030161.8	Gabarapl1	NA	2.12044	2.57258e-13	0.0727158	0.914172
ENSMUSG00000042726.14	Trafd1	1	2.11966	1.06872e-23	-0.201533	0.608182
ENSMUSG00000022091.6	Sorbs3	NA	2.11719	2.03901e-14	0.28156	0.566426
ENSMUSG00000009487.10	Otog	NA	2.10777	0.0471868	1.22229	0.428951
ENSMUSG00000079056.12	Kcnip3	NA	2.1077	6.59785e-08	0.458702	0.493896
ENSMUSG00000046733.7	Gprc5a	NA	2.09644	2.72028e-06	0.390154	0.64074
ENSMUSG00000030911.7	Zp2	NA	2.09603	0.00082555	-0.239035	0.856465
ENSMUSG00000028989.3	Angptl7	NA	2.09053	6.58637e-07	-0.479418	0.529442
ENSMUSG00000021025.8	Nfkbia	NA	2.0895	1.81718e-25	0.929596	8.66193e-05
ENSMUSG00000049303.10	Syt12	NA	2.08314	1.13677e-13	0.200218	0.711882
ENSMUSG00000032015.16	Pou2f3	NA	2.07958	0.00961917	-0.577137	0.712256
ENSMUSG00000029167.13	Ppargc1a	1	2.07656	5.44035e-13	-0.78235	0.0368903
ENSMUSG00000056501.3	Cebpb	NA	2.07651	6.83176e-11	0.322694	0.566917
ENSMUSG00000022358.7	Fbxo32	NA	2.07622	1.96146e-14	-0.160814	0.766288
ENSMUSG00000020676.2	Ccl11	NA	2.07597	7.80451e-05	1.54713	0.013513
ENSMUSG00000030562.17	Nox4	NA	2.06659	1.05004e-07	-0.675862	0.305855
ENSMUSG00000040128.9	Pnrc1	NA	2.06632	3.91688e-33	-0.522622	0.022775
ENSMUSG00000022025.13	Cnmd	NA	2.06298	1.11156e-08	0.50786	0.396872
ENSMUSG00000056749.7	Nfil3	NA	2.05981	7.78436e-31	-0.891274	9.67488e-05
ENSMUSG00000034825.14	Nrip3	NA	2.04938	0.0262775	0.314559	0.868645
ENSMUSG00000043953.12	Ccrl2	NA	2.04299	1.10774e-31	0.318596	0.254381
ENSMUSG00000031004.8	Mki67	NA	2.03083	1.72917e-07	-0.661815	0.266668
ENSMUSG00000060969.9	Irx1	NA	2.02584	0.0480359	0.0144683	0.994528
ENSMUSG00000009394.13	Syn2	NA	2.02529	6.92875e-10	-0.229386	0.71644
ENSMUSG00000024471.12	Myot	NA	2.02314	1.47445e-13	0.515854	0.191812
ENSMUSG00000038546.9	Ranbp9	NA	2.02255	1.26996e-18	-0.415309	0.228435
ENSMUSG00000020034.7	Tcp11l2	NA	2.02192	7.51806e-15	-0.565132	0.119392
ENSMUSG00000042406.8	Atf4	NA	2.00533	1.07665e-29	0.0278965	0.951233
ENSMUSG00000029683.7	Lmod2	NA	2.00203	1.70152e-22	0.20447	0.584112
ENSMUSG00000025726.11	Slc28a1	NA	2.0013	0.0360636	0.225805	0.915281
ENSMUSG00000042417.5	Ccno	NA	1.9996	0.0123714	0.164014	0.927837
ENSMUSG00000042641.18	Rgsl1	NA	1.99849	0.0186127	1.13014	0.348017
ENSMUSG00000027748.11	Trpc4	NA	1.98876	0.00228881	-0.162014	0.917363
ENSMUSG00000105096.1	Gbp10	NA	1.98424	8.90633e-07	-1.15924	0.0347262
ENSMUSG00000061878.15	Sphk1	NA	1.9811	2.9789e-06	1.17752	0.0276573
ENSMUSG00000049551.2	Fzd9	NA	1.97009	0.000135831	-0.36439	0.733627
ENSMUSG00000038550.10	Ciart	NA	1.96772	5.01972e-09	2.21131	4.13363e-10
ENSMUSG00000020424.3	Gatsl3	NA	1.96325	3.11468e-20	0.824934	0.00212347
ENSMUSG00000022180.7	Slc7a8	NA	1.96273	1.52548e-09	-0.493183	0.337639
ENSMUSG00000068742.11	Cry2	NA	1.96016	6.02715e-27	0.212722	0.506871
ENSMUSG00000036523.16	Greb1	NA	1.95924	3.37856e-05	0.462872	0.579616
ENSMUSG00000030144.4	Clec4d	NA	1.9557	0.000445239	0.045103	0.973941
ENSMUSG00000110353.1	RP23-234F23.1	NA	1.95329	8.0369e-07	-0.580732	0.380912
ENSMUSG00000001228.14	Uhrf1	NA	1.95322	2.03842e-05	-1.33891	0.0445053
ENSMUSG00000044737.6	Klk14	NA	1.95113	0.0321469	1.24237	0.318862
ENSMUSG00000064057.12	Scgb3a1	NA	1.94732	0.00678929	1.26646	0.187458
ENSMUSG00000038332.13	Sesn1	NA	1.94253	3.30887e-05	-0.563727	0.440442
ENSMUSG00000022479.15	Vdr	NA	1.93544	0.001541	0.752993	0.453977
ENSMUSG00000108889.2	Olfr1555-ps1	NA	1.92893	0.0466475	-2.60426	0.182534
ENSMUSG00000038816.14	Ctnnal1	NA	1.92591	3.6047e-25	-0.523458	0.0374489
ENSMUSG00000045968.7	Teddm2	NA	1.91582	1.09712e-07	0.63867	0.246833
ENSMUSG00000028801.14	Stpg1	NA	1.91149	0.000106496	-0.366131	0.699539
ENSMUSG00000049008.4	AC124604.3	NA	1.90056	0.043208	0.54376	0.752153
ENSMUSG00000003752.9	Itpkc	NA	1.89654	2.33517e-12	0.164973	0.766238
ENSMUSG00000022548.14	Apod	NA	1.89631	2.64588e-09	0.542174	0.246238
ENSMUSG00000026950.17	Neb	NA	1.88945	2.30962e-07	-0.234698	0.736235
ENSMUSG00000078722.2	RP23-411B7.5	NA	1.88736	0.000317658	-0.11425	0.928274
ENSMUSG00000041046.7	Ramp3	NA	1.88522	2.28726e-09	0.530979	0.265899
ENSMUSG00000038216.7	Pnmt	NA	1.8824	0.00210712	1.40324	0.0651215
ENSMUSG00000051111.16	Sv2c	NA	1.88219	0.0103059	-0.415473	0.760052
ENSMUSG00000036411.10	RP23-342N3.3	NA	1.87671	0.00750704	0.512518	0.704332
ENSMUSG00000019102.10	Aldh3a1	NA	1.86191	0.02386	1.20729	0.283373
ENSMUSG00000046179.17	E2f8	NA	1.86125	0.000143454	0.0217378	0.986368
ENSMUSG00000038068.15	Rnf144b	NA	1.8587	1.88051e-19	-0.116732	0.782896
ENSMUSG00000091144.2	Phf11d	NA	1.85136	3.9028e-06	-0.852279	0.161454
ENSMUSG00000058260.2	Serpina9	NA	1.85108	0.0368566	0.534971	0.736944
ENSMUSG00000005686.17	Ampd3	NA	1.85048	2.54582e-10	-0.407283	0.376185
ENSMUSG00000032315.6	Cyp1a1	NA	1.84613	0.0131085	-1.21124	0.273082
ENSMUSG00000029843.4	Slc13a4	NA	1.84068	0.0120269	0.744797	0.529276
ENSMUSG00000031016.9	Wee1	NA	1.83225	7.761e-06	0.00880959	0.993129
ENSMUSG00000019970.15	Sgk1	1	1.82868	5.11454e-17	0.438667	0.16247
ENSMUSG00000052253.6	Zfp622	NA	1.82755	5.48967e-16	0.437519	0.190088
ENSMUSG00000031636.7	Pdlim3	NA	1.82219	0.00161537	0.369229	0.716572
ENSMUSG00000055866.9	Per2	NA	1.81821	2.30786e-05	1.55108	0.00149864
ENSMUSG00000047250.13	Ptgs1	NA	1.81715	4.45221e-07	-0.00188374	0.998101
ENSMUSG00000078735.3	Il11ra2	NA	1.8106	0.0590362	1.44987	0.234755
ENSMUSG00000016520.7	Lnx2	NA	1.80707	4.26763e-11	0.0189938	0.978642
ENSMUSG00000051439.6	Cd14	NA	1.80654	3.07196e-12	0.0381515	0.955605
ENSMUSG00000079465.8	Col4a3	2	1.80314	1.60517e-12	-0.321962	0.486795
ENSMUSG00000018339.11	Gpx3	NA	1.80227	1.84166e-10	0.525763	0.192156
ENSMUSG00000048707.9	Tprn	NA	1.80058	1.66558e-15	-0.575288	0.0825488
ENSMUSG00000002910.11	Arrdc2	NA	1.79319	0.0140079	0.459441	0.71103
ENSMUSG00000053166.14	Cdh22	NA	1.79298	4.77098e-07	0.844811	0.0743689
ENSMUSG00000061815.11	Rufy4	NA	1.7886	1.84963e-06	-0.195092	0.799985
ENSMUSG00000034936.2	Arl4d	NA	1.78754	1.48459e-18	-0.024808	0.96498
ENSMUSG00000032577.16	Mapkapk3	NA	1.78535	5.02111e-19	0.356449	0.243076
ENSMUSG00000025172.2	Ankrd2	NA	1.78342	0.0353461	1.32275	0.229273
ENSMUSG00000071637.5	Cebpd	NA	1.78196	2.35414e-13	1.56086	3.40071e-09
ENSMUSG00000039756.12	Dnttip2	NA	1.78184	8.44788e-23	0.0585535	0.889238
ENSMUSG00000020812.17	RP23-313J14.6	NA	1.77874	6.87486e-12	0.0866572	0.882641
ENSMUSG00000018143.10	Mafk	NA	1.77575	4.58523e-13	0.115778	0.819549
ENSMUSG00000000223.13	Drp2	1	1.77325	0.000592626	0.0182955	0.989169
ENSMUSG00000001943.8	Vsig2	NA	1.77274	2.9014e-19	0.361361	0.229048
ENSMUSG00000048445.6	Ccdc57	NA	1.76821	1.20251e-05	0.534829	0.410054
ENSMUSG00000003545.3	Fosb	NA	1.76725	0.00104412	0.575415	0.511158
ENSMUSG00000032815.16	Fanca	NA	1.76523	0.000590848	-0.459723	0.620148
ENSMUSG00000022094.15	Slc39a14	NA	1.76095	3.42932e-16	-0.0443409	0.932664
ENSMUSG00000038508.7	Gdf15	NA	1.75375	0.0527557	2.18207	0.0281212
ENSMUSG00000036964.14	Trim17	NA	1.74996	0.0108526	-0.436627	0.752218
ENSMUSG00000021943.7	Gdf10	NA	1.74722	8.59618e-06	-0.0728923	0.940251
ENSMUSG00000015312.9	Gadd45b	NA	1.74161	2.19156e-12	0.6352	0.059057
ENSMUSG00000035969.15	Rusc2	NA	1.74121	2.76504e-08	-0.644246	0.134597
ENSMUSG00000031284.16	Pak3	NA	1.74061	0.0390626	-0.17842	0.927257
ENSMUSG00000034640.9	Tiparp	NA	1.72864	2.52648e-11	0.10864	0.843452
ENSMUSG00000054252.17	Fgfr3	NA	1.72582	1.18379e-06	-0.17456	0.803833
ENSMUSG00000022439.9	Parvg	NA	1.72155	0.000650038	-0.187015	0.858389
ENSMUSG00000054855.13	Rnd1	1	1.71939	0.000153363	0.875419	0.150267
ENSMUSG00000045211.5	Nudt18	NA	1.71862	0.00768698	0.334154	0.773816
ENSMUSG00000028793.15	Rnf19b	NA	1.71228	1.98867e-19	-0.142964	0.702242
ENSMUSG00000067158.9	Col4a4	2	1.71039	1.38992e-18	0.0107022	0.983313
ENSMUSG00000000531.5	Grasp	NA	1.70738	3.54591e-15	0.233213	0.551153
ENSMUSG00000003418.11	St8sia6	1	1.70471	8.48996e-22	-0.59671	0.0178119
ENSMUSG00000048878.6	Hexim1	NA	1.70338	1.11535e-24	0.307787	0.234856
ENSMUSG00000027244.14	Atg13	NA	1.70127	3.9085e-12	-0.432659	0.229273
ENSMUSG00000029352.14	Crybb3	NA	1.69935	0.00216647	0.730211	0.382162
ENSMUSG00000058297.16	Spock2	NA	1.69924	0.00239244	-0.441238	0.642144
ENSMUSG00000027692.16	Tnik	NA	1.68995	5.13072e-10	-0.436968	0.284825
ENSMUSG00000033752.7	Mnd1	NA	1.68831	0.00218152	-0.00559515	0.99679
ENSMUSG00000037725.8	Ckap2	NA	1.68551	0.0249674	0.111669	0.950191
ENSMUSG00000034858.16	Fam214a	NA	1.6774	1.44054e-07	-0.464175	0.334303
ENSMUSG00000048534.7	Amica1	NA	1.67205	0.0461917	-0.188257	0.919247
ENSMUSG00000020893.17	Per1	1	1.66931	1.14122e-07	0.862296	0.0291314
ENSMUSG00000046694.6	Fam46b	NA	1.66925	0.022498	0.161479	0.916889
ENSMUSG00000037185.9	Krt80	NA	1.66541	5.88464e-06	-0.576401	0.293433
ENSMUSG00000033107.5	Rnf125	NA	1.66531	1.6207e-08	-0.554917	0.229531
ENSMUSG00000035354.9	Uvrag	NA	1.66292	2.34133e-11	-0.404138	0.283246
ENSMUSG00000022018.7	Rgcc	NA	1.65742	7.12335e-11	0.925626	0.00233946
ENSMUSG00000090698.2	Apold1	NA	1.64914	2.25584e-10	1.22184	3.46535e-05
ENSMUSG00000024201.12	Kdm4b	NA	1.64705	1.55915e-07	0.842729	0.0347065
ENSMUSG00000028967.10	Errfi1	NA	1.64358	1.43288e-12	0.267075	0.498753
ENSMUSG00000030643.14	Rab30	1	1.64324	4.79169e-17	-0.548621	0.049173
ENSMUSG00000040721.9	Zfhx2	NA	1.63943	1.80837e-13	-1.05996	9.73288e-05
ENSMUSG00000071392.6	Ect2l	NA	1.63511	0.0154325	-0.630805	0.617436
ENSMUSG00000035860.9	Cdhr3	NA	1.63402	0.027881	0.626428	0.597861
ENSMUSG00000062991.7	Nrg1	NA	1.6336	0.00129147	0.848185	0.21921
ENSMUSG00000052726.15	Kcnt2	NA	1.63244	2.52401e-05	0.210852	0.779676
ENSMUSG00000061175.11	Fnip2	NA	1.6321	7.62508e-14	-0.0341802	0.951233
ENSMUSG00000090799.2	Klhl33	NA	1.62583	1.83918e-06	-1.32044	0.00069872
ENSMUSG00000028645.11	Slc2a1	NA	1.62536	2.60841e-09	-0.117176	0.837047
ENSMUSG00000026773.19	Pfkfb3	NA	1.6234	1.24785e-12	0.664537	0.0240364
ENSMUSG00000066122.6	Olfr45	NA	1.62146	0.0493485	-0.67559	0.645486
ENSMUSG00000021250.13	Fos	1	1.62059	0.0184309	-0.0309611	0.983946
ENSMUSG00000020023.18	Tmcc3	NA	1.62021	6.07393e-27	0.202493	0.424971
ENSMUSG00000025473.16	Adam8	NA	1.62011	0.000128048	0.630663	0.321695
ENSMUSG00000026313.16	Hdac4	1	1.61993	4.26007e-14	-0.284917	0.421346
ENSMUSG00000060681.15	Slc9a6	NA	1.61795	2.55862e-22	0.0737662	0.837047
ENSMUSG00000063889.16	Crem	NA	1.61692	2.72744e-08	0.193628	0.730724
ENSMUSG00000038463.8	Olfml2b	NA	1.61606	1.78954e-13	0.0654069	0.900469
ENSMUSG00000003477.5	Inmt	NA	1.61158	2.36112e-06	0.423344	0.432577
ENSMUSG00000024206.14	Rfx2	NA	1.60934	0.00169843	-0.436272	0.623043
ENSMUSG00000030630.16	Fah	NA	1.60893	1.03205e-11	-0.172484	0.699719
ENSMUSG00000043613.8	Mmp3	NA	1.60532	4.11421e-05	0.947776	0.0543082
ENSMUSG00000092470.1	RP23-372H6.5	NA	1.60391	0.000137091	-0.242062	0.779061
ENSMUSG00000020130.9	Tbc1d15	NA	1.60389	1.85741e-10	-0.275688	0.522099
ENSMUSG00000050296.14	Abca12	NA	1.60192	8.14454e-07	0.497705	0.304837
ENSMUSG00000073758.10	Sh3d21	NA	1.59737	1.5029e-07	0.0272845	0.971079
ENSMUSG00000028864.7	Hgf	NA	1.59599	0.0120386	-0.360341	0.768559
ENSMUSG00000035021.13	Baz1a	NA	1.59484	4.83982e-10	-0.233648	0.630414
ENSMUSG00000064284.12	Cdpf1	NA	1.58387	3.55708e-12	0.124899	0.790424
ENSMUSG00000037447.16	Arid5a	NA	1.58188	4.83069e-08	0.383094	0.403414
ENSMUSG00000040093.15	Bmf	1	1.58061	2.23219e-08	-0.119748	0.842052
ENSMUSG00000074207.10	Adh1	NA	1.57838	9.471e-08	0.637893	0.109427
ENSMUSG00000079415.2	Cntf	NA	1.57779	0.0331533	1.20433	0.20244
ENSMUSG00000025723.12	Nmb	NA	1.57315	0.000558013	0.827203	0.187457
ENSMUSG00000005533.10	Igf1r	NA	1.57046	4.93079e-11	-0.564941	0.0808451
ENSMUSG00000047875.6	Gpr157	NA	1.56685	5.55411e-17	-0.1189	0.751668
ENSMUSG00000020107.10	Anapc16	NA	1.56087	3.64951e-18	-0.163947	0.625869
ENSMUSG00000050103.18	Agmo	NA	1.55997	6.85713e-07	-0.489554	0.318248
ENSMUSG00000040170.13	Fmo2	NA	1.55968	1.18779e-11	-0.0930921	0.849545
ENSMUSG00000022231.10	Sema5a	NA	1.55891	0.00245767	-1.01276	0.124572
ENSMUSG00000040165.14	Cd209c	NA	1.55429	0.0468611	1.34254	0.166781
ENSMUSG00000032218.7	Ccnb2	NA	1.55394	0.044245	0.542662	0.674379
ENSMUSG00000020183.11	Cpm	NA	1.55121	3.45123e-12	-0.215056	0.605713
ENSMUSG00000024561.9	Mbd1	NA	1.54381	0.00175244	-0.161727	0.869781
ENSMUSG00000014158.12	Trpv4	NA	1.54167	6.92416e-08	-0.295311	0.554756
ENSMUSG00000029516.19	Cit	NA	1.53931	0.00223677	-0.147496	0.889238
ENSMUSG00000016239.11	Lonrf3	NA	1.53747	0.000529584	-0.969902	0.172556
ENSMUSG00000078566.8	Bnip3	NA	1.53731	1.90511e-09	-0.100263	0.852764
ENSMUSG00000042895.6	Abra	NA	1.53614	6.09623e-09	-0.227819	0.635279
ENSMUSG00000007827.10	Ankrd26	NA	1.53546	0.00319741	-1.18087	0.0726235
ENSMUSG00000039661.14	Dusp26	NA	1.52835	0.0478464	-0.0848184	0.963665
ENSMUSG00000021752.13	Kctd6	NA	1.52466	4.3046e-13	0.0247721	0.965369
ENSMUSG00000038295.14	Atg9b	NA	1.52436	0.0242048	-0.681404	0.54941
ENSMUSG00000062382.9	RP23-44G15.5	NA	1.52256	0.01449	0.00248079	0.998147
ENSMUSG00000039958.17	Mettl20	NA	1.52241	4.87324e-09	-0.418229	0.281355
ENSMUSG00000020919.11	Stat5b	NA	1.51783	5.42485e-20	-0.2035	0.475734
ENSMUSG00000090236.2	Car15	NA	1.51763	0.00390606	-0.225041	0.829007
ENSMUSG00000016552.13	Foxred2	NA	1.51701	0.00519072	-0.424461	0.673679
ENSMUSG00000005514.14	Por	NA	1.51582	1.94134e-14	-0.241395	0.472517
ENSMUSG00000047793.13	Sned1	NA	1.51453	8.12935e-09	-0.833809	0.0102463
ENSMUSG00000075256.9	Cerkl	NA	1.50238	0.0396974	1.02849	0.301601
ENSMUSG00000037071.2	Scd1	NA	1.49819	8.14454e-07	-0.293302	0.579924
ENSMUSG00000037458.15	Azin1	NA	1.49611	4.30994e-12	-0.302801	0.376289
ENSMUSG00000024222.16	Fkbp5	NA	1.49133	0.00216863	-0.894403	0.159596
ENSMUSG00000027932.14	Slc27a3	NA	1.48838	0.0214917	1.09787	0.181103
ENSMUSG00000036390.8	Gadd45a	NA	1.48343	7.83167e-07	-0.0163778	0.982773
ENSMUSG00000016194.14	Hsd11b1	NA	1.4811	5.51414e-19	0.318541	0.200862
ENSMUSG00000026473.15	Glul	NA	1.47797	4.23301e-15	0.131458	0.715898
ENSMUSG00000015405.15	Ace2	NA	1.47565	2.60921e-08	0.445122	0.267942
ENSMUSG00000053414.7	Hunk	NA	1.47307	0.0483778	0.517771	0.677977
ENSMUSG00000020542.18	Myocd	NA	1.46516	6.684e-15	-1.01465	2.34118e-06
ENSMUSG00000003269.17	Cyth2	NA	1.46222	2.89154e-17	0.215904	0.467539
ENSMUSG00000027469.16	Tpx2	NA	1.45762	0.0415406	0.0714573	0.966979
ENSMUSG00000022637.11	Cblb	NA	1.45692	3.8543e-06	-0.604023	0.164415
ENSMUSG00000027463.14	Slc52a3	NA	1.45531	7.39633e-05	0.533174	0.334915
ENSMUSG00000004655.5	Aqp1	NA	1.44898	1.34059e-14	0.34868	0.203268
ENSMUSG00000071454.13	Dtnb	NA	1.44603	5.82251e-07	0.510487	0.232616
ENSMUSG00000043439.5	Epop	NA	1.44494	0.0203285	-0.215427	0.86133
ENSMUSG00000025161.16	Slc16a3	NA	1.43985	0.0100484	1.4523	0.0231383
ENSMUSG00000028766.10	Alpl	NA	1.43935	1.2302e-06	0.477778	0.266448
ENSMUSG00000031442.20	Mcf2l	NA	1.43904	2.71582e-07	-0.109081	0.852023
ENSMUSG00000099041.1	RP23-395P6.10	NA	1.43443	1.77331e-06	-0.348761	0.477883
ENSMUSG00000074063.10	Osgin1	NA	1.43284	6.72925e-06	-0.532066	0.269143
ENSMUSG00000028978.12	Nos3	NA	1.43272	6.55806e-14	0.145388	0.688581
ENSMUSG00000057835.7	Zfp119a	NA	1.43251	1.47163e-05	0.0799171	0.919247
ENSMUSG00000027412.12	Lpin3	NA	1.43225	0.000888474	-0.0869389	0.928494
ENSMUSG00000032238.17	Rora	2	1.43205	8.62158e-10	-0.317489	0.395389
ENSMUSG00000053647.4	Gper1	NA	1.42845	0.00385208	0.89994	0.171473
ENSMUSG00000025650.12	Col7a1	2	1.42376	0.0691255	2.41516	0.00263484
ENSMUSG00000039361.11	Picalm	NA	1.41777	2.23839e-08	-0.183437	0.695593
ENSMUSG00000024190.6	Dusp1	NA	1.41688	5.89284e-10	0.282989	0.447793
ENSMUSG00000115020.1	Vmn1r218	NA	1.41507	0.0425252	0.213439	0.878031
ENSMUSG00000031431.13	Tsc22d3	NA	1.41336	1.01822e-06	0.474832	0.253137
ENSMUSG00000029675.12	Eln	3	1.41213	6.75615e-14	-0.117476	0.753269
ENSMUSG00000038022.11	Fam188b	NA	1.41155	3.43988e-05	-0.0587187	0.944656
ENSMUSG00000024301.9	Kifc5b	NA	1.40863	0.0115726	0.577675	0.513502
ENSMUSG00000063445.14	Nmral1	NA	1.40564	9.23522e-06	0.610375	0.174748
ENSMUSG00000032332.17	Col12a1	NA	1.40281	0.020094	0.724876	0.404148
ENSMUSG00000061742.11	Slc22a12	NA	1.40223	0.0288749	-0.796884	0.411023
ENSMUSG00000040451.17	Sgms1	NA	1.40024	2.52648e-11	-0.162944	0.677312
ENSMUSG00000070002.7	Ell	NA	1.39988	9.56399e-13	0.0460752	0.922256
ENSMUSG00000060639.5	Hist1h4i	NA	1.39595	0.000514368	0.28154	0.704089
ENSMUSG00000036913.15	Trim67	NA	1.39554	0.007288	0.383882	0.670151
ENSMUSG00000028271.9	Gtf2b	NA	1.39094	1.19159e-07	0.404216	0.307335
ENSMUSG00000029135.10	Fosl2	NA	1.38864	7.60072e-14	0.422563	0.0986011
ENSMUSG00000018593.13	Sparc	2	1.38492	2.02069e-23	0.628011	0.000120764
ENSMUSG00000032411.15	Tfdp2	NA	1.38312	8.03785e-09	-0.366539	0.308839
ENSMUSG00000054263.12	Lifr	NA	1.37999	1.3889e-12	-0.371405	0.187941
ENSMUSG00000074178.2	Gm10638	NA	1.37664	0.00645832	-0.23509	0.803833
ENSMUSG00000079462.1	RP24-193H8.3	NA	1.37655	0.00238061	-0.988353	0.128986
ENSMUSG00000041794.13	Myrip	NA	1.37057	0.000154891	0.222324	0.742819
ENSMUSG00000030223.14	Ptpro	NA	1.36955	0.0020988	-0.459765	0.526564
ENSMUSG00000020027.18	Socs2	NA	1.36935	7.02137e-09	0.100494	0.837048
ENSMUSG00000022246.14	Rai14	NA	1.36824	3.39936e-08	0.170734	0.719031
ENSMUSG00000018931.3	Natd1	NA	1.36774	3.60019e-11	-0.471238	0.102846
ENSMUSG00000024330.16	Col11a2	NA	1.36703	0.0129678	0.577036	0.502356
ENSMUSG00000019944.14	Rhobtb1	1	1.36496	2.49963e-05	0.198419	0.740585
ENSMUSG00000033313.11	Fbxl8	NA	1.35869	0.00216789	0.256589	0.757925
ENSMUSG00000025981.13	Coq10b	NA	1.35824	4.96185e-08	1.24168	5.37267e-06
ENSMUSG00000044456.16	Rin3	NA	1.35818	1.60448e-08	-0.14011	0.769056
ENSMUSG00000034903.18	Cobll1	NA	1.35599	2.3392e-09	-0.455565	0.151108
ENSMUSG00000027947.11	Il6ra	NA	1.35134	0.00125571	-0.598654	0.325271
ENSMUSG00000015837.15	Sqstm1	NA	1.34825	8.11143e-09	0.134401	0.768559
ENSMUSG00000015647.9	Lama5	NA	1.34765	1.46115e-08	0.395363	0.254248
ENSMUSG00000050234.7	Gja4	NA	1.34656	6.4543e-12	0.662139	0.00674504
ENSMUSG00000030067.17	Foxp1	1	1.3459	1.81308e-12	-0.554775	0.0265739
ENSMUSG00000022951.15	Rcan1	NA	1.34458	4.73193e-06	0.193757	0.718932
ENSMUSG00000032376.12	Usp3	NA	1.3437	1.49381e-13	-0.0736026	0.854717
ENSMUSG00000061859.16	Inadl	NA	1.34295	4.32245e-10	0.424475	0.164876
ENSMUSG00000021886.7	Gpr65	NA	1.34259	0.0215981	0.66116	0.447126
ENSMUSG00000026655.15	Fam107b	NA	1.34256	4.11864e-06	-0.0891383	0.891016
ENSMUSG00000019848.14	Popdc3	NA	1.33772	1.08584e-06	-0.136946	0.79983
ENSMUSG00000078816.9	Prkcg	NA	1.33605	1.90051e-05	0.0538403	0.943444
ENSMUSG00000035595.6	RP23-6P9.7	NA	1.33421	0.000122034	0.368196	0.528818
ENSMUSG00000034271.16	Jdp2	NA	1.33249	6.43596e-06	0.385721	0.409492
ENSMUSG00000022096.14	Hr	NA	1.33162	0.000349693	-0.467635	0.408236
ENSMUSG00000030522.14	Mtmr10	NA	1.33161	2.85378e-11	-0.0452393	0.925754
ENSMUSG00000023032.12	Slc4a8	NA	1.33001	3.15988e-07	0.138026	0.793071
ENSMUSG00000039903.16	Eva1c	NA	1.32981	0.0225878	0.0469307	0.972384
ENSMUSG00000033863.1	Klf9	NA	1.3287	5.97586e-08	-0.248951	0.551848
ENSMUSG00000028917.14	Plekhm2	NA	1.32822	5.44339e-16	0.355152	0.123366
ENSMUSG00000041132.11	N4bp2l1	1	1.32665	0.00056421	-0.779954	0.131047
ENSMUSG00000052934.14	Fbxo31	NA	1.32233	1.54905e-10	-0.397969	0.173763
ENSMUSG00000006418.17	Rnf114	NA	1.32026	4.09233e-18	0.183217	0.480728
ENSMUSG00000025283.15	Sat1	NA	1.31726	3.47133e-15	0.274504	0.285535
ENSMUSG00000038903.13	Ccdc68	NA	1.31704	0.00184681	0.154861	0.858564
ENSMUSG00000024883.7	Rin1	NA	1.31506	0.0225436	0.54954	0.527547
ENSMUSG00000079484.12	Phyhd1	NA	1.31239	1.59451e-09	0.167661	0.675693
ENSMUSG00000039220.16	Ppp1r10	NA	1.31226	0.00095157	0.464744	0.443286
ENSMUSG00000031574.8	Star	NA	1.31193	0.0109994	1.15114	0.0587632
ENSMUSG00000029603.15	Dtx1	NA	1.31058	0.0323309	-0.416767	0.697268
ENSMUSG00000039126.10	Prune2	NA	1.30769	8.76584e-06	-0.146253	0.796385
ENSMUSG00000024558.12	Mapk4	NA	1.30632	1.46642e-08	-0.467875	0.161926
ENSMUSG00000030862.13	Cpxm2	NA	1.30575	0.000111289	0.183144	0.774477
ENSMUSG00000041180.13	Hectd2	NA	1.30574	0.0012061	-0.424712	0.523186
ENSMUSG00000015053.14	Gata2	NA	1.30558	1.56356e-15	0.103872	0.754665
ENSMUSG00000042510.7	RP24-87I22.6	NA	1.30429	0.0140423	0.850113	0.228394
ENSMUSG00000028111.4	Ctsk	NA	1.30269	3.09626e-05	0.621662	0.145982
ENSMUSG00000003032.8	Klf4	1	1.2994	1.35135e-09	0.687723	0.00878349
ENSMUSG00000052632.15	Asap2	NA	1.2989	2.29292e-07	-0.251914	0.561317
ENSMUSG00000038900.17	Rpl12	NA	1.29763	1.20061e-05	0.432142	0.3255
ENSMUSG00000001739.14	Cldn15	NA	1.29693	8.72213e-07	0.822977	0.00981754
ENSMUSG00000041488.16	Stx3	NA	1.29669	3.53292e-06	-0.177776	0.737503
ENSMUSG00000053470.13	Kdm3a	NA	1.29665	7.17524e-12	-0.334344	0.235227
ENSMUSG00000022205.15	Sub1	NA	1.2958	8.16079e-16	0.282058	0.244335
ENSMUSG00000022270.16	Retreg1	NA	1.29529	5.57115e-07	-0.0393013	0.950337
ENSMUSG00000028391.16	Wdr31	NA	1.29455	0.0125231	-0.263708	0.796385
ENSMUSG00000031740.8	Mmp2	1	1.29199	6.28812e-22	0.596622	0.000184848
ENSMUSG00000021903.11	Galnt15	NA	1.29155	6.88351e-08	0.0799876	0.875655
ENSMUSG00000035984.14	Nme5	NA	1.29037	0.000413214	-0.227983	0.742819
ENSMUSG00000038175.10	Mylip	NA	1.28927	4.57867e-10	0.254105	0.45399
ENSMUSG00000054728.16	Phactr1	NA	1.28879	1.95e-05	0.511853	0.229137
ENSMUSG00000054277.8	Arfgap3	NA	1.28662	4.1904e-09	0.518451	0.0807689
ENSMUSG00000031360.14	Ctps2	NA	1.28436	4.45736e-05	0.106816	0.870023
ENSMUSG00000029780.14	Nt5c3	NA	1.28354	8.93494e-18	-0.0197799	0.960195
ENSMUSG00000068794.7	Col28a1	NA	1.27931	0.0317275	1.00016	0.186428
ENSMUSG00000038370.6	Pcp4l1	NA	1.279	2.92471e-07	-0.109547	0.827977
ENSMUSG00000041112.16	Elmo1	NA	1.27751	1.09139e-05	-0.0225771	0.974221
ENSMUSG00000045294.11	Insig1	1	1.2766	5.89284e-10	-0.165103	0.669931
ENSMUSG00000030655.15	Smg1	NA	1.27444	3.85025e-11	-0.209505	0.526564
ENSMUSG00000033644.5	Piwil2	NA	1.27024	0.00235635	0.878254	0.0980842
ENSMUSG00000024076.9	Vit	NA	1.26495	0.0115657	0.617328	0.393119
ENSMUSG00000005125.13	Ndrg1	NA	1.26091	2.85763e-09	0.301381	0.357996
ENSMUSG00000027487.11	Cdk5rap1	NA	1.25859	0.0081062	0.289557	0.725931
ENSMUSG00000029126.7	Nsg1	NA	1.25854	0.00326008	0.562432	0.365327
ENSMUSG00000022074.6	Tnfrsf10b	NA	1.25703	0.00180604	0.0541326	0.954518
ENSMUSG00000020227.10	Irak3	NA	1.25696	6.86018e-09	0.378452	0.237347
ENSMUSG00000052572.16	Dlg2	2	1.25655	0.00135344	-0.0766109	0.929566
ENSMUSG00000053093.16	Myh7	NA	1.25103	0.100832	3.22671	7.66981e-06
ENSMUSG00000037580.10	Gch1	NA	1.25048	0.000103048	0.291028	0.603736
ENSMUSG00000015468.14	Notch4	NA	1.24955	1.06066e-07	0.106474	0.822712
ENSMUSG00000043505.8	Gimap5	NA	1.24907	0.00608648	0.3132	0.689526
ENSMUSG00000032010.15	Usp2	NA	1.24656	3.23588e-07	0.564858	0.0769247
ENSMUSG00000028444.17	Cntfr	NA	1.24647	0.0115043	0.389196	0.637829
ENSMUSG00000027397.14	Slc20a1	NA	1.24545	2.19156e-12	-0.027305	0.951233
ENSMUSG00000020472.14	Zkscan17	NA	1.24334	3.54702e-11	-0.242851	0.434656
ENSMUSG00000024867.14	Pip5k1b	NA	1.24276	4.32245e-10	-0.335098	0.258997
ENSMUSG00000034083.16	Ccdc174	NA	1.23904	1.12203e-09	0.328002	0.299089
ENSMUSG00000074794.10	Arrdc3	2	1.23808	4.06721e-09	0.0281645	0.95829
ENSMUSG00000011034.6	Slc5a1	NA	1.23695	0.0203057	-0.084841	0.946335
ENSMUSG00000061983.7	Rps12	NA	1.23623	0.00137049	0.647167	0.215486
ENSMUSG00000057137.9	Tmem140	NA	1.23393	2.25489e-14	-0.0443592	0.906104
ENSMUSG00000079481.11	Nhsl2	NA	1.23295	1.57651e-05	-0.29801	0.534487
ENSMUSG00000034255.17	Arhgap27	NA	1.23156	9.76534e-07	0.369115	0.328344
ENSMUSG00000107023.2	RP24-159C12.7	NA	1.227	0.00178731	1.07032	0.0205871
ENSMUSG00000028337.14	Coro2a	NA	1.22542	0.0422617	-0.812101	0.350374
ENSMUSG00000046223.10	Plaur	NA	1.22388	0.00116687	0.512969	0.354333
ENSMUSG00000022474.15	Pmm1	NA	1.22194	0.000154891	0.161775	0.791727
ENSMUSG00000030994.15	RP23-445H7.1	NA	1.21785	0.00489248	0.675475	0.280664
ENSMUSG00000022376.8	Adcy8	NA	1.21626	0.0310808	-0.611329	0.495375
ENSMUSG00000036833.16	Pnpla7	NA	1.21608	2.62587e-09	-0.415488	0.145588
ENSMUSG00000058163.14	RP23-14F5.8	NA	1.21517	0.0362876	-0.248949	0.827922
ENSMUSG00000039960.5	Rhou	NA	1.21156	0.00076023	-0.0426877	0.961257
ENSMUSG00000070720.3	Tmem200b	NA	1.21116	1.19269e-05	-0.144937	0.799076
ENSMUSG00000021365.15	Nedd9	NA	1.21109	3.10368e-13	-0.0328129	0.935382
ENSMUSG00000095677.1	Dynlt1f	1	1.21004	1.54939e-06	0.697371	0.0282292
ENSMUSG00000026134.11	Prim2	NA	1.2092	0.000868847	-0.1414	0.854987
ENSMUSG00000028576.12	Ift74	NA	1.20854	0.000225229	-0.239976	0.690601
ENSMUSG00000057337.13	Chst3	NA	1.20846	2.34835e-05	-0.758375	0.0460066
ENSMUSG00000078954.9	Arhgap8	NA	1.2073	0.0104387	-0.421598	0.61452
ENSMUSG00000044199.6	S1pr4	NA	1.20378	0.0225418	-0.225648	0.822952
ENSMUSG00000001891.16	Ugp2	NA	1.20245	2.19478e-16	0.00667318	0.98562
ENSMUSG00000045576.16	St7l	NA	1.20227	2.45368e-05	0.199746	0.700213
ENSMUSG00000055116.8	Arntl	NA	1.20078	4.35496e-07	-1.91964	1.11263e-14
ENSMUSG00000020427.11	Igfbp3	NA	1.19963	4.7531e-05	0.0608323	0.927789
ENSMUSG00000032802.8	Srxn1	NA	1.19669	0.000205463	-0.336984	0.516816
ENSMUSG00000036578.7	Fxyd7	NA	1.19652	0.0238744	1.41264	0.0150162
ENSMUSG00000064179.13	Tnnt1	NA	1.1963	0.00539177	0.224322	0.77371
ENSMUSG00000059811.13	Atl2	NA	1.19598	1.30417e-14	-0.00785235	0.983946
ENSMUSG00000054720.12	Lrrc8c	NA	1.19478	1.65516e-07	-0.233389	0.548754
ENSMUSG00000024481.4	Lvrn	NA	1.19408	0.00245767	-0.608997	0.27982
ENSMUSG00000021338.17	Lrrc16a	NA	1.19352	0.0265638	-0.393404	0.659661
ENSMUSG00000038264.8	Sema7a	NA	1.19284	2.1206e-10	0.296284	0.296562
ENSMUSG00000056900.13	Usp13	NA	1.19248	7.90044e-07	-0.549216	0.0824003
ENSMUSG00000038594.9	Cep85l	1	1.19168	1.07396e-11	-0.705621	0.000843099
ENSMUSG00000037996.17	Slc24a2	NA	1.19151	0.00652049	0.414519	0.568764
ENSMUSG00000030967.15	Zranb1	NA	1.19055	1.48047e-10	-0.00526179	0.99155
ENSMUSG00000050105.5	Grrp1	NA	1.19008	0.000559645	0.880384	0.0352186
ENSMUSG00000002831.13	Plin4	NA	1.19003	7.51221e-08	0.0311918	0.953496
ENSMUSG00000029648.13	Flt1	NA	1.1895	6.04689e-19	-0.171462	0.444833
ENSMUSG00000044857.7	Lemd2	1	1.18861	3.9917e-13	0.0728317	0.833634
ENSMUSG00000065999.13	RP23-326E2.4	NA	1.18583	0.033216	-0.0947661	0.938022
ENSMUSG00000078994.9	Zfp429	NA	1.18501	0.00895554	0.37411	0.616363
ENSMUSG00000041120.6	Nbl1	NA	1.18303	0.000344224	-0.122067	0.855487
ENSMUSG00000025902.13	Sox17	NA	1.18299	2.58595e-06	0.799976	0.00772494
ENSMUSG00000089809.9	Rasgef1b	NA	1.18247	0.0025755	0.133459	0.864698
ENSMUSG00000047714.14	Ppp1r2	NA	1.17859	1.06179e-12	-0.185551	0.512544
ENSMUSG00000057719.10	Sh3rf2	NA	1.17803	1.8426e-05	-0.515868	0.168688
ENSMUSG00000021508.11	Cxcl14	NA	1.17782	0.000808796	1.13744	0.00418614
ENSMUSG00000003134.10	Tbc1d8	NA	1.17687	1.03221e-10	0.130842	0.717273
ENSMUSG00000039781.14	Cep131	NA	1.17545	0.000782965	0.258044	0.677636
ENSMUSG00000024742.15	Fen1	NA	1.17537	0.00303993	0.0365615	0.969963
ENSMUSG00000092417.3	Gpank1	NA	1.17478	0.00019734	0.474964	0.2971
ENSMUSG00000027715.9	Ccna2	NA	1.17101	0.0258815	0.352108	0.702924
ENSMUSG00000017652.16	Cd40	NA	1.17092	0.0119962	0.660847	0.325441
ENSMUSG00000023885.8	Thbs2	NA	1.16696	4.86398e-11	0.0694316	0.855635
ENSMUSG00000030089.15	Slc41a3	NA	1.16683	4.35221e-05	-1.13019	0.000395069
ENSMUSG00000021273.10	Fdft1	NA	1.16635	3.6863e-10	-0.0842691	0.826309
ENSMUSG00000037966.15	Ninj1	NA	1.16564	1.75664e-08	0.00692796	0.989353
ENSMUSG00000048756.11	Foxo3	1	1.16537	5.12262e-06	-0.310257	0.442948
ENSMUSG00000035121.6	Neil2	NA	1.16456	8.1164e-05	-0.240066	0.654385
ENSMUSG00000058291.14	Zfp68	NA	1.16249	5.91147e-16	0.0808173	0.784651
ENSMUSG00000024052.17	Lpin2	NA	1.16248	0.000311246	-0.646074	0.133523
ENSMUSG00000062329.4	Cytl1	NA	1.15721	0.00821603	0.14389	0.866003
ENSMUSG00000034442.11	Trmt5	NA	1.15613	9.27338e-08	0.090656	0.838501
ENSMUSG00000051316.8	Taf7	NA	1.15483	6.05893e-07	0.135266	0.769376
ENSMUSG00000066263.10	Olfr639	NA	1.1541	0.0333721	-0.828693	0.318248
ENSMUSG00000047205.12	Dusp18	NA	1.15316	3.86898e-08	-0.888885	0.000198023
ENSMUSG00000020251.13	Glt8d2	NA	1.15028	0.0157441	0.53535	0.460795
ENSMUSG00000017707.9	Serinc3	NA	1.14947	8.63071e-13	-0.121724	0.686235
ENSMUSG00000030847.8	Bag3	NA	1.14886	2.64699e-15	0.207353	0.367921
ENSMUSG00000060187.4	Lrrc10	NA	1.14707	7.29374e-07	0.128223	0.774654
ENSMUSG00000028795.15	Ccdc28b	NA	1.14532	0.000297413	0.552571	0.201553
ENSMUSG00000030353.15	Tead4	NA	1.14505	1.96753e-05	0.351927	0.407673
ENSMUSG00000040270.16	Bach2	1	1.14324	0.000174602	-0.703693	0.0818493
ENSMUSG00000040152.8	Thbs1	NA	1.13789	0.00211541	0.947348	0.0314515
ENSMUSG00000032578.7	Cish	NA	1.13691	2.03992e-05	0.174594	0.71927
ENSMUSG00000062760.10	RP23-95H5.1	NA	1.13501	0.0443869	0.316973	0.746166
ENSMUSG00000059864.2	Olfr1393	NA	1.13407	0.0413093	-0.420958	0.661354
ENSMUSG00000036934.9	RP23-211B19.2	NA	1.13265	3.89083e-06	-0.0962221	0.852764
ENSMUSG00000029722.15	Agfg2	NA	1.13238	6.38264e-10	-0.672806	0.0027882
ENSMUSG00000079654.3	Prrt4	1	1.13163	0.00731431	0.583329	0.3255
ENSMUSG00000018347.16	Zkscan6	NA	1.13055	3.26255e-06	0.397471	0.267996
ENSMUSG00000023868.15	Pde10a	NA	1.12899	0.000835894	0.090092	0.905536
ENSMUSG00000019122.8	Ccl9	NA	1.12879	0.00420603	0.905414	0.057809
ENSMUSG00000057193.8	Slc44a2	NA	1.12825	4.30444e-16	0.110484	0.67363
ENSMUSG00000036206.12	Sh3bp4	NA	1.12813	1.11813e-10	-0.0796333	0.828739
ENSMUSG00000041592.16	Sdk2	NA	1.12781	0.027272	-1.07096	0.0884554
ENSMUSG00000052906.7	Ubxn8	NA	1.12748	3.23431e-08	0.0211536	0.968963
ENSMUSG00000023046.6	Igfbp6	NA	1.12732	0.00141691	0.651797	0.16134
ENSMUSG00000070576.4	Mn1	NA	1.12713	3.14461e-06	-0.147966	0.751332
ENSMUSG00000025907.14	Rb1cc1	NA	1.12712	7.86356e-08	-0.323306	0.302853
ENSMUSG00000053198.13	Prx	NA	1.1267	0.0284038	0.471594	0.562542
ENSMUSG00000041219.14	Arhgap11a	NA	1.12607	0.0190868	-0.306249	0.724258
ENSMUSG00000020363.6	Gfpt2	NA	1.12505	0.000253853	0.963601	0.00660011
ENSMUSG00000027933.11	Ints3	NA	1.12265	4.92333e-09	-0.167994	0.63166
ENSMUSG00000091971.3	Hspa1a	NA	1.12214	0.0089115	-0.557255	0.377701
ENSMUSG00000044337.5	Ackr3	NA	1.12133	2.55881e-06	0.0729098	0.886343
ENSMUSG00000036208.13	Nepro	NA	1.11905	0.000596549	-0.0270181	0.972384
ENSMUSG00000003154.15	Foxj2	1	1.1168	2.60902e-08	-0.529392	0.0401463
ENSMUSG00000035493.10	Tgfbi	NA	1.1142	4.94021e-09	0.157421	0.655151
ENSMUSG00000069763.3	Tmem100	NA	1.11322	0.00191019	0.526516	0.293938
ENSMUSG00000053560.4	Ier2	NA	1.11107	1.05274e-05	0.905466	0.00172664
ENSMUSG00000003762.13	Adck4	NA	1.11068	3.5415e-07	0.10971	0.802695
ENSMUSG00000028776.14	Tinagl1	NA	1.11043	8.42003e-09	0.0248847	0.959804
ENSMUSG00000045319.13	Proser2	NA	1.11006	6.95871e-05	-0.489325	0.231908
ENSMUSG00000024843.15	Chka	NA	1.10776	0.00243508	-0.128606	0.860125
ENSMUSG00000003779.15	Kif20a	NA	1.10668	0.039473	0.0806797	0.946768
ENSMUSG00000032715.9	Trib3	NA	1.10589	0.00187603	0.38973	0.491253
ENSMUSG00000008348.9	Ubc	NA	1.10563	8.15004e-13	-0.963464	1.0861e-08
ENSMUSG00000045392.8	Olfr1033	NA	1.10554	3.57214e-05	-0.313908	0.47461
ENSMUSG00000026365.15	Cfh	NA	1.10463	3.83425e-05	0.138436	0.786902
ENSMUSG00000024085.13	Man2a1	NA	1.10434	8.25109e-10	-0.175461	0.582714
ENSMUSG00000040435.12	Ppp1r15a	NA	1.10412	5.90666e-05	-0.0906727	0.87323
ENSMUSG00000021133.9	Susd6	NA	1.10274	4.96428e-06	-0.216791	0.606106
ENSMUSG00000031842.14	Pde4c	NA	1.1022	7.85966e-05	-0.198671	0.696911
ENSMUSG00000095990.1	Zfp97	NA	1.0996	7.01238e-10	-0.101109	0.781365
ENSMUSG00000074824.3	Rslcan18	NA	1.09941	0.0414024	-0.793737	0.302753
ENSMUSG00000030530.15	Furin	NA	1.09904	1.74196e-07	-1.03528	7.75165e-06
ENSMUSG00000036264.9	Fstl4	NA	1.09882	0.00020633	-0.502792	0.229531
ENSMUSG00000031700.11	Gpt2	NA	1.09865	6.70208e-11	-1.01036	7.55001e-08
ENSMUSG00000034412.13	Tbc1d10a	NA	1.09853	2.39754e-06	0.495153	0.115551
ENSMUSG00000031939.16	Taf1d	NA	1.09509	1.32595e-06	0.181116	0.657146
ENSMUSG00000046707.9	Csnk2a2	NA	1.09015	7.61762e-07	-0.312444	0.348695
ENSMUSG00000016541.10	Atxn10	NA	1.08815	1.39704e-06	-0.0373901	0.944691
ENSMUSG00000041773.8	Enc1	NA	1.088	0.00156666	0.869265	0.0351554
ENSMUSG00000072294.5	Klf12	1	1.08638	3.70002e-06	-0.529014	0.0980842
ENSMUSG00000039842.15	Mcph1	NA	1.08531	1.7926e-06	-0.277416	0.4658
ENSMUSG00000037664.13	Cdkn1c	NA	1.08495	7.91247e-07	0.239664	0.515238
ENSMUSG00000031382.14	Asb11	NA	1.08072	1.21621e-10	-0.185038	0.516447
ENSMUSG00000029552.19	Tes	NA	1.08063	0.000848755	-0.0498711	0.948665
ENSMUSG00000039221.10	Rpl22l1	NA	1.08019	2.53761e-06	0.241635	0.532362
ENSMUSG00000061039.5	Olfr920	NA	1.0791	0.0471868	-0.826248	0.300466
ENSMUSG00000028909.17	Ptpru	NA	1.07869	0.00871947	-0.206961	0.783474
ENSMUSG00000031701.6	Dnaja2	NA	1.07858	2.86714e-09	-0.153898	0.641264
ENSMUSG00000045896.14	Paip2b	NA	1.078	2.05728e-08	-0.484711	0.0541442
ENSMUSG00000074807.2	Gm10762	NA	1.07757	0.0155064	-0.280143	0.717273
ENSMUSG00000021108.18	Prkch	NA	1.07704	7.66634e-11	0.248831	0.333102
ENSMUSG00000010755.17	Cars	NA	1.07622	6.86026e-07	0.156393	0.696911
ENSMUSG00000024935.10	Slc1a1	NA	1.07571	0.0043298	0.222496	0.741881
ENSMUSG00000042429.8	Adora1	NA	1.07515	0.00952441	0.630247	0.256802
ENSMUSG00000096696.1	Zfp960	NA	1.07262	0.000208426	0.293551	0.539716
ENSMUSG00000073490.11	Ifi207	NA	1.07251	0.000683872	0.152676	0.79752
ENSMUSG00000028840.10	Zfp593	NA	1.07221	0.000376776	0.607885	0.125904
ENSMUSG00000024395.8	Lims2	NA	1.07082	1.75473e-07	0.230097	0.496655
ENSMUSG00000022579.10	Gpihbp1	NA	1.06981	2.16265e-05	0.812344	0.00574003
ENSMUSG00000003617.16	Cp	NA	1.0691	2.08895e-08	-0.293803	0.302836
ENSMUSG00000027074.14	Slc43a3	NA	1.06789	1.82989e-07	0.223494	0.511548
ENSMUSG00000017740.17	Slc12a5	NA	1.06701	0.0149128	0.00180049	0.998147
ENSMUSG00000026409.14	Pfkfb2	NA	1.06688	2.08703e-08	-0.280674	0.333111
ENSMUSG00000021260.8	Hhipl1	NA	1.06663	0.00255776	-0.00282117	0.997279
ENSMUSG00000027243.8	Harbi1	NA	1.06632	1.03647e-06	-0.516337	0.0832914
ENSMUSG00000001227.11	Sema6b	NA	1.06489	9.42706e-07	0.589997	0.031035
ENSMUSG00000029913.14	Prdm5	NA	1.06447	4.81969e-06	0.247106	0.536484
ENSMUSG00000024421.16	Lama3	NA	1.06375	0.00864722	0.259488	0.7216
ENSMUSG00000073434.11	Wdr90	NA	1.06368	0.010361	0.741245	0.168135
ENSMUSG00000024678.6	Ms4a4d	NA	1.06299	5.91399e-08	0.17066	0.636843
ENSMUSG00000046034.8	Otulin	NA	1.06103	1.49333e-05	0.149503	0.745972
ENSMUSG00000052560.15	Cpne8	NA	1.06018	0.0465824	0.455166	0.580198
ENSMUSG00000031812.16	Map1lc3b	NA	1.06016	2.3392e-09	0.162621	0.608022
ENSMUSG00000020190.13	Mknk2	NA	1.05984	0.000149221	-0.235124	0.62483
ENSMUSG00000079555.2	Haus3	NA	1.05924	0.00056608	0.336099	0.503294
ENSMUSG00000032202.11	Rab27a	NA	1.05864	0.00622177	-0.102642	0.900426
ENSMUSG00000066880.15	Zfp617	NA	1.05811	1.79485e-12	-0.225955	0.347264
ENSMUSG00000059013.12	Sh2d3c	NA	1.05569	6.86026e-07	0.346236	0.261004
ENSMUSG00000027580.17	Helz2	NA	1.05565	2.35243e-12	-0.231023	0.324212
ENSMUSG00000033713.12	Foxn3	NA	1.05386	5.50983e-08	-0.55593	0.0221802
ENSMUSG00000035357.16	Pdzrn3	NA	1.0525	2.61464e-05	-0.158973	0.731413
ENSMUSG00000060470.7	Adgrg3	NA	1.05207	0.0421393	0.681105	0.327964
ENSMUSG00000073725.8	Lmbrd1	NA	1.05186	1.58835e-07	0.192966	0.58098
ENSMUSG00000064120.13	Mocs1	NA	1.0486	7.22808e-10	-0.285332	0.269788
ENSMUSG00000016528.10	Mapkapk2	NA	1.04713	2.91829e-11	0.0930503	0.764019
ENSMUSG00000021559.14	Dapk1	NA	1.04699	2.32943e-07	-0.0559891	0.901554
ENSMUSG00000007476.18	Lrrc8a	NA	1.04629	1.43193e-05	0.334206	0.35327
ENSMUSG00000001240.13	Ramp2	NA	1.04536	3.58271e-06	0.549469	0.0566159
ENSMUSG00000031833.10	Mast3	NA	1.0441	1.05877e-05	-0.243359	0.549084
ENSMUSG00000048997.17	Atxn7l2	NA	1.04173	0.00187287	-0.0696861	0.926627
ENSMUSG00000029534.17	St7	NA	1.04019	9.95195e-08	-0.332391	0.256275
ENSMUSG00000027346.15	Gpcpd1	1	1.03956	0.000211762	-0.264928	0.569206
ENSMUSG00000071540.4	RP23-56C21.4	NA	1.03926	0.000780043	-0.620395	0.119715
ENSMUSG00000032633.12	Flcn	NA	1.0388	5.18749e-05	0.23027	0.600026
ENSMUSG00000050708.16	Ftl1	NA	1.03777	0.000853241	0.27579	0.59495
ENSMUSG00000038173.15	Enpp6	NA	1.0377	0.0447675	0.0979597	0.927789
ENSMUSG00000018263.11	Tbx5	NA	1.03622	1.13074e-09	-0.278643	0.276894
ENSMUSG00000042745.9	Id1	NA	1.03521	4.67655e-05	1.36801	2.46658e-07
ENSMUSG00000045761.15	Fam179a	NA	1.03495	0.021764	1.21891	0.0140903
ENSMUSG00000018932.9	Map2k3	NA	1.03476	4.1739e-09	0.0648539	0.861927
ENSMUSG00000017999.16	Ddx27	NA	1.03374	1.34014e-09	-0.0968401	0.781315
ENSMUSG00000026778.13	Prkcq	NA	1.0315	0.000205858	0.562678	0.125282
ENSMUSG00000032265.14	Fam46a	NA	1.03085	0.000101634	-0.0363064	0.953614
ENSMUSG00000046675.7	Tmem251	NA	1.03061	8.45741e-05	0.440842	0.234895
ENSMUSG00000034157.12	Cipc	NA	1.02633	2.16867e-11	0.15764	0.555837
ENSMUSG00000116045.1	Hgs	NA	1.02463	0.000215858	-0.317791	0.467208
ENSMUSG00000041000.8	Trim62	NA	1.02431	0.00346457	-0.0383296	0.965273
ENSMUSG00000046442.4	Ppm1e	1	1.02392	0.00156142	-0.848747	0.0294931
ENSMUSG00000029571.14	Tmem106b	NA	1.02329	0.000134522	-0.55633	0.109682
ENSMUSG00000028525.16	Pde4b	NA	1.0228	4.22064e-05	0.262399	0.519766
ENSMUSG00000025491.14	Ifitm1	NA	1.02159	0.00145958	0.761341	0.0535417
ENSMUSG00000030801.10	Kat8	NA	1.0212	1.32673e-07	0.0145353	0.976234
ENSMUSG00000035112.17	Wnk4	NA	1.01813	1.42453e-06	0.796671	0.00115018
ENSMUSG00000001053.15	N4bp3	NA	1.01741	1.85428e-05	0.4538	0.165396
ENSMUSG00000022037.15	Clu	NA	1.01651	1.79485e-12	0.615018	0.000226223
ENSMUSG00000032000.17	Birc3	NA	1.0152	0.000100089	-0.0737273	0.895072
ENSMUSG00000029388.14	Eif2b1	NA	1.01391	1.18379e-06	-0.218139	0.537937
ENSMUSG00000038007.14	Acer2	NA	1.01213	0.000100864	-0.0183148	0.976319
ENSMUSG00000036745.15	Ttll7	NA	1.01075	0.000283617	-0.223397	0.645486
ENSMUSG00000019850.11	Tnfaip3	NA	1.01033	0.000399059	0.260968	0.593098
ENSMUSG00000028496.17	Mllt3	NA	1.00969	0.00010614	-0.0933413	0.860557
ENSMUSG00000055013.15	Agap1	NA	1.00937	0.000581735	-0.45782	0.263704
ENSMUSG00000020044.13	Timp3	NA	1.00902	1.39704e-06	0.170058	0.648258
ENSMUSG00000032998.16	Foxj3	NA	1.00788	3.06237e-11	-0.27192	0.22679
ENSMUSG00000030088.15	Aldh1l1	NA	1.00779	0.0130465	-0.604938	0.274747
ENSMUSG00000026819.15	Slc25a25	NA	1.00646	0.00516375	-0.228886	0.716862
ENSMUSG00000034612.7	Chst11	NA	1.00617	0.000205465	0.157931	0.757497
ENSMUSG00000034675.17	Dbn1	NA	1.00561	0.000901414	0.748339	0.0410386
ENSMUSG00000020151.16	Ptprr	NA	1.00353	0.0284038	0.685475	0.254108
ENSMUSG00000037679.9	Inf2	NA	1.00275	8.77078e-06	0.418437	0.177361
ENSMUSG00000029670.12	Ing3	NA	1.00228	3.34808e-06	0.35237	0.269286
ENSMUSG00000030521.11	Mphosph10	NA	1.00117	0.000567926	-0.0438642	0.948909
ENSMUSG00000026637.13	Traf5	NA	0.999759	0.011023	0.128038	0.871626
ENSMUSG00000020400.17	Tnip1	NA	0.999299	1.70658e-09	0.1255	0.68699
ENSMUSG00000021835.15	Bmp4	NA	0.996221	0.00408307	0.226069	0.710846
ENSMUSG00000025089.15	Gfra1	NA	0.994575	0.000972288	-0.650049	0.0923893
ENSMUSG00000075600.3	Zc3h3	NA	0.993961	2.1758e-06	-0.0309711	0.952114
ENSMUSG00000071369.11	Map3k5	NA	0.993551	3.51676e-11	-0.336628	0.104831
ENSMUSG00000039879.9	Heca	NA	0.993335	3.00075e-06	-0.718413	0.00434048
ENSMUSG00000068874.13	Selenbp1	NA	0.993042	6.67021e-06	-0.0186278	0.97193
ENSMUSG00000020085.15	Aifm2	NA	0.992571	6.58637e-07	0.00683578	0.989058
ENSMUSG00000020485.14	Supt4a	NA	0.991829	2.91784e-08	0.0539033	0.892465
ENSMUSG00000057440.7	Mpp7	NA	0.990761	0.00913342	-1.13123	0.00999982
ENSMUSG00000031490.6	Eif4ebp1	NA	0.990352	0.000317945	0.545526	0.128455
ENSMUSG00000031712.10	Il15	NA	0.98887	2.51718e-06	-0.017163	0.973496
ENSMUSG00000024524.16	Gnal	NA	0.988604	0.0735844	-1.41241	0.0437783
ENSMUSG00000041353.12	Tmem29	NA	0.986664	0.00299037	0.332793	0.551059
ENSMUSG00000029401.8	Rilpl2	NA	0.986461	0.000676986	0.0499533	0.942198
ENSMUSG00000062822.8	CH36-200G6.4	NA	0.98577	2.44629e-06	0.116832	0.773355
ENSMUSG00000024030.6	Abcg1	NA	0.984956	0.00211872	-0.586077	0.190411
ENSMUSG00000055994.15	Nod2	NA	0.984509	0.00366825	0.147764	0.822952
ENSMUSG00000037266.18	Rsrp1	NA	0.98432	1.29589e-05	0.0915075	0.839481
ENSMUSG00000026116.11	Tmem131	NA	0.982009	3.42402e-08	-0.328655	0.195115
ENSMUSG00000035948.13	Acss3	NA	0.981233	0.0133583	-0.860956	0.0916716
ENSMUSG00000028150.14	Rorc	NA	0.980626	1.39322e-08	-0.182028	0.537362
ENSMUSG00000020844.6	Nxn	NA	0.9803	8.00108e-06	-0.0949035	0.831597
ENSMUSG00000021431.15	Snrnp48	NA	0.978245	6.58162e-05	-0.121342	0.794981
ENSMUSG00000047446.18	Arl4a	1	0.976901	7.70353e-05	0.112154	0.816283
ENSMUSG00000024101.14	Washc1	NA	0.975948	3.54064e-06	0.00156707	0.997378
ENSMUSG00000020134.13	Peli1	NA	0.975435	1.78815e-06	-0.406703	0.157287
ENSMUSG00000022500.15	Litaf	NA	0.974704	1.05584e-06	0.426294	0.110769
ENSMUSG00000040123.17	Zmym5	NA	0.974093	4.77551e-07	-0.348369	0.205084
ENSMUSG00000022817.14	Itgb5	NA	0.972304	1.18215e-09	0.232733	0.341486
ENSMUSG00000030739.18	Myh14	NA	0.972044	6.27537e-14	0.467132	0.00300053
ENSMUSG00000040289.8	Hey1	NA	0.971343	0.000130728	0.125366	0.797979
ENSMUSG00000034235.17	Usp54	NA	0.97031	0.000100864	-0.227235	0.591181
ENSMUSG00000022377.16	Asap1	NA	0.970276	4.82878e-11	-0.192827	0.425615
ENSMUSG00000035877.17	Zhx3	1	0.968983	8.26511e-05	-0.255558	0.526826
ENSMUSG00000049791.4	Fzd4	NA	0.967045	1.1541e-07	0.149774	0.64889
ENSMUSG00000025572.17	Tmc6	NA	0.966117	0.00175027	0.189988	0.731578
ENSMUSG00000026923.15	Notch1	NA	0.965744	0.00451147	-0.0262416	0.973394
ENSMUSG00000030470.15	Csrp3	NA	0.965095	1.4781e-07	0.443561	0.0623904
ENSMUSG00000049550.17	Clip1	NA	0.964892	0.00051849	-0.153085	0.766288
ENSMUSG00000020262.15	Adarb1	NA	0.964461	1.27585e-14	-0.0325929	0.912417
ENSMUSG00000038831.16	Ralgps1	1	0.964174	2.32364e-07	-0.0154527	0.973815
ENSMUSG00000029484.12	Anxa3	NA	0.962341	4.8395e-09	0.029936	0.939657
ENSMUSG00000001946.14	Esam	NA	0.960264	7.06657e-14	0.310594	0.0732721
ENSMUSG00000033684.14	Qsox1	NA	0.96003	0.000352541	-0.263307	0.548159
ENSMUSG00000017428.16	Psmd11	NA	0.959149	9.84533e-08	-0.0959259	0.786015
ENSMUSG00000026170.6	Cyp27a1	NA	0.958935	3.79566e-10	-0.123518	0.665763
ENSMUSG00000047617.11	RP23-47P18.9	NA	0.958668	2.03992e-05	0.604723	0.0296875
ENSMUSG00000078919.10	Dpm1	NA	0.955727	3.15937e-07	-0.00451552	0.99293
ENSMUSG00000025245.14	Lztfl1	NA	0.955506	3.88462e-05	-0.382809	0.244344
ENSMUSG00000025337.10	Sbds	NA	0.955268	7.0813e-08	0.0227321	0.959925
ENSMUSG00000027999.15	Pla2g12a	NA	0.955078	5.15046e-05	0.00961235	0.986632
ENSMUSG00000067780.3	Pi15	3	0.954988	0.019001	0.00605128	0.994528
ENSMUSG00000061079.14	Zfp143	NA	0.954323	0.00015197	-0.041197	0.945183
ENSMUSG00000026270.11	Capn10	NA	0.953973	0.00112599	-0.221545	0.671297
ENSMUSG00000034164.17	Emid1	1	0.952488	0.0719844	1.5108	0.00482152
ENSMUSG00000044177.4	Wfikkn2	NA	0.951764	6.36395e-05	-0.044328	0.936023
ENSMUSG00000078349.2	AW011738	NA	0.951518	0.00211541	-0.457302	0.315396
ENSMUSG00000032078.17	Zpr1	NA	0.95043	0.00100757	0.245821	0.616587
ENSMUSG00000038708.10	Golga4	NA	0.949175	8.8618e-07	-0.233245	0.448618
ENSMUSG00000025006.16	Sorbs1	NA	0.949167	1.4623e-06	-0.604004	0.0109294
ENSMUSG00000025815.13	Dhtkd1	NA	0.949115	0.00599949	-0.579204	0.211507
ENSMUSG00000030189.15	Ybx3	1	0.948903	5.15058e-06	-0.112751	0.778408
ENSMUSG00000040751.12	Lat2	NA	0.945928	0.0480359	0.276696	0.734163
ENSMUSG00000026672.11	Optn	NA	0.945546	6.4543e-12	0.0591172	0.837651
ENSMUSG00000035863.14	Palm	1	0.944788	5.90375e-07	-0.129573	0.711265
ENSMUSG00000075705.12	Msrb1	NA	0.944418	1.5359e-10	0.237052	0.283394
ENSMUSG00000008384.8	Sertad1	NA	0.943929	0.00459398	0.87629	0.0238865
ENSMUSG00000026466.16	Tor1aip1	NA	0.943037	9.96214e-11	-0.365406	0.0578661
ENSMUSG00000019866.14	Aim1	NA	0.941747	8.66695e-05	-0.126659	0.783845
ENSMUSG00000044938.8	Klhl31	NA	0.941586	4.75085e-10	-0.0824281	0.784462
ENSMUSG00000028954.11	Nub1	NA	0.940799	4.46387e-09	0.082055	0.79752
ENSMUSG00000025178.8	Pi4k2a	NA	0.94062	1.19222e-06	-0.33016	0.237986
ENSMUSG00000039713.16	Plekhg5	NA	0.94019	7.50165e-06	0.195123	0.592197
ENSMUSG00000032599.12	Ip6k2	NA	0.939977	0.000536939	0.153658	0.758905
ENSMUSG00000025982.13	Sf3b1	NA	0.939696	1.91392e-09	-0.0504411	0.88156
ENSMUSG00000023826.15	Park2	NA	0.939288	7.04533e-05	0.565729	0.057809
ENSMUSG00000021285.15	Ppp1r13b	1	0.938567	7.56116e-08	0.0166666	0.970177
ENSMUSG00000029822.15	Osbpl3	NA	0.938311	2.92273e-10	-0.421226	0.0322821
ENSMUSG00000030029.14	Lrig1	NA	0.938125	2.04155e-05	-0.304912	0.358047
ENSMUSG00000008730.17	Hipk1	NA	0.938069	4.13736e-05	-0.418457	0.179285
ENSMUSG00000024087.3	Cyp1b1	NA	0.937576	0.012006	0.2005	0.762337
ENSMUSG00000066571.13	RP23-349I9.6	NA	0.936986	7.90388e-08	-0.375418	0.112053
ENSMUSG00000040040.16	Ift88	NA	0.936808	0.00064326	-0.400106	0.32156
ENSMUSG00000014905.4	Dnajb9	NA	0.936765	1.52236e-05	-0.171944	0.655838
ENSMUSG00000054509.7	Parp4	NA	0.936746	1.57335e-09	-0.119708	0.677988
ENSMUSG00000022462.7	Slc38a2	NA	0.93636	0.00125439	-0.25506	0.598075
ENSMUSG00000020076.7	Ddx50	NA	0.935892	6.83332e-13	0.294682	0.101594
ENSMUSG00000028331.12	Trmo	NA	0.935446	0.0456293	1.19251	0.0180597
ENSMUSG00000022148.16	Fyb	NA	0.935381	0.0847564	1.83503	0.000629329
ENSMUSG00000024528.7	Srfbp1	NA	0.93255	0.00018391	0.0645349	0.906737
ENSMUSG00000092329.1	AC114005.5	NA	0.92931	0.0051967	0.343206	0.505009
ENSMUSG00000020811.16	Wscd1	NA	0.928537	0.000107042	0.260866	0.505168
ENSMUSG00000034135.15	Sik3	NA	0.927878	1.54223e-05	-0.677618	0.00765651
ENSMUSG00000066278.6	Vps37b	NA	0.927713	1.9496e-05	-0.54482	0.0515523
ENSMUSG00000028822.11	Tmem50a	NA	0.926529	2.71316e-08	0.150409	0.615355
ENSMUSG00000030103.11	Bhlhe40	NA	0.925568	0.000970925	1.23521	3.0092e-05
ENSMUSG00000020300.14	Cpeb4	NA	0.925536	0.000423712	-0.471538	0.181477
ENSMUSG00000042419.8	Nfkbil1	NA	0.925345	0.0146314	0.318026	0.612333
ENSMUSG00000015305.6	Sash1	NA	0.924327	3.91262e-08	-0.591436	0.00337242
ENSMUSG00000091938.2	Gm2564	NA	0.924001	0.342116	2.34985	0.00852623
ENSMUSG00000027997.9	Casp6	NA	0.923578	0.00117091	-0.0878312	0.881511
ENSMUSG00000016024.9	Lbp	NA	0.923007	0.000606803	-0.16261	0.741017
ENSMUSG00000038670.11	Mybpc2	NA	0.922864	0.00321566	0.865241	0.0166561
ENSMUSG00000008393.9	Carhsp1	NA	0.92249	1.12937e-08	0.37268	0.0848638
ENSMUSG00000037820.15	Tgm2	NA	0.921986	1.43426e-16	0.0730207	0.738846
ENSMUSG00000038217.13	Tlcd2	NA	0.921281	0.0404173	0.0688831	0.944668
ENSMUSG00000051586.16	Mical3	NA	0.920411	2.70846e-05	-0.355975	0.25106
ENSMUSG00000070424.12	Art5	NA	0.920188	0.00019316	-0.0917998	0.854987
ENSMUSG00000037339.17	Fam53a	NA	0.92016	2.16623e-05	-0.109597	0.792516
ENSMUSG00000032495.8	Lrrc2	NA	0.919807	5.17457e-12	-0.253546	0.185379
ENSMUSG00000034614.14	Pik3ip1	NA	0.918921	1.02157e-06	0.518707	0.0267398
ENSMUSG00000064220.6	Hist2h2aa2	NA	0.918008	0.0128797	0.571977	0.243141
ENSMUSG00000022831.14	Hcls1	NA	0.917871	0.000296374	0.332216	0.387179
ENSMUSG00000040339.10	Fam102b	NA	0.917093	0.000185604	-0.0767137	0.87999
ENSMUSG00000061111.8	Fam195b	NA	0.916316	1.12203e-09	0.395007	0.0439543
ENSMUSG00000022425.16	Enpp2	1	0.915885	0.000320297	0.285675	0.477036
ENSMUSG00000020312.12	Shc2	NA	0.91532	0.0269598	0.492476	0.404148
ENSMUSG00000002847.6	Pla1a	NA	0.913781	7.10609e-06	0.446309	0.0980842
ENSMUSG00000024778.12	Fas	NA	0.913373	0.000154891	0.384703	0.256586
ENSMUSG00000035828.11	Pim3	NA	0.912732	0.000177948	0.679614	0.019403
ENSMUSG00000047022.18	Mipol1	NA	0.91239	0.00282534	-0.150228	0.797979
ENSMUSG00000047330.8	Kcne4	NA	0.911743	0.00420096	0.360291	0.467496
ENSMUSG00000035399.12	Oser1	NA	0.911545	2.83228e-05	0.338573	0.281033
ENSMUSG00000078515.4	Ddi2	1	0.910645	0.000164392	-0.00685735	0.99121
ENSMUSG00000017299.13	Dnttip1	NA	0.910601	8.34095e-09	-0.0566791	0.870376
ENSMUSG00000020806.15	Rhbdf2	NA	0.910334	3.16786e-05	0.180424	0.641541
ENSMUSG00000095595.2	Fam177a	NA	0.908817	1.91092e-05	-0.206242	0.567355
ENSMUSG00000028796.17	Phc2	NA	0.908323	1.047e-10	-0.184702	0.425204
ENSMUSG00000023087.15	Noct	NA	0.906602	0.00316448	-0.175118	0.751332
ENSMUSG00000022911.10	Arl13b	NA	0.906047	0.00579575	-0.0213076	0.978318
ENSMUSG00000007659.18	Bcl2l1	NA	0.905986	0.0137831	-0.0959287	0.897869
ENSMUSG00000031379.13	Pir	NA	0.905804	0.00319097	0.0223293	0.97476
ENSMUSG00000096255.1	Dynlt1	NA	0.905534	2.11908e-07	0.173988	0.56296
ENSMUSG00000032212.10	Sltm	NA	0.90397	1.57161e-11	0.269321	0.159896
ENSMUSG00000042390.9	Gatad2b	NA	0.899783	5.926e-05	-0.45171	0.128903
ENSMUSG00000020088.10	Sar1a	NA	0.899512	2.26098e-10	0.0578078	0.846501
ENSMUSG00000084883.2	Ccdc85c	NA	0.898594	4.48174e-08	-0.545376	0.00674039
ENSMUSG00000034401.16	Spata6	NA	0.897316	0.000145121	0.0153335	0.97885
ENSMUSG00000039703.15	Nploc4	NA	0.896455	3.52434e-10	-0.324407	0.0956098
ENSMUSG00000031822.20	Gse1	NA	0.896153	0.000936798	-0.51492	0.150252
ENSMUSG00000040624.17	Plekhg1	NA	0.895617	2.97167e-05	-0.201356	0.584524
ENSMUSG00000033323.13	Ctdp1	NA	0.89465	8.04969e-07	0.353169	0.165985
ENSMUSG00000021775.11	Nr1d2	NA	0.894188	3.45123e-12	0.802909	9.40699e-09
ENSMUSG00000010067.13	Rassf1	NA	0.893651	0.000650877	0.497624	0.149182
ENSMUSG00000017009.3	Sdc4	NA	0.890421	2.58815e-05	0.263861	0.424799
ENSMUSG00000019996.17	Map7	NA	0.890058	0.00288145	-0.930455	0.00579673
ENSMUSG00000055817.17	Mta3	NA	0.889841	0.000321912	-0.271923	0.496248
ENSMUSG00000050628.6	Ubald2	NA	0.889244	0.000662651	0.369121	0.324962
ENSMUSG00000029465.14	Arpc3	NA	0.889011	7.44098e-08	0.391709	0.0706787
ENSMUSG00000019254.16	Ppp1r12c	NA	0.887845	0.000102876	0.00732635	0.989376
ENSMUSG00000059669.8	Taf1b	NA	0.887794	6.86536e-06	0.0726127	0.863429
ENSMUSG00000075701.9	Vimp	NA	0.887406	5.31013e-08	0.133354	0.65872
ENSMUSG00000090958.2	Lrrc32	NA	0.886747	0.00209324	0.171395	0.740681
ENSMUSG00000039067.5	Psmd7	NA	0.886443	2.35242e-11	0.148284	0.512582
ENSMUSG00000033016.15	Nfatc1	NA	0.886405	7.17392e-07	-0.0950255	0.787671
ENSMUSG00000024191.14	Bnip1	NA	0.885753	1.22793e-07	0.158609	0.600818
ENSMUSG00000033502.14	Cdc14a	NA	0.885711	0.0118576	0.223306	0.716923
ENSMUSG00000046768.13	Rhoj	NA	0.883516	3.11367e-06	0.0320137	0.943702
ENSMUSG00000026203.16	Dnajb2	NA	0.881786	5.9866e-09	0.0127286	0.973126
ENSMUSG00000072812.4	Ahnak2	NA	0.880884	0.0049964	0.35914	0.446542
ENSMUSG00000038539.15	Atf5	NA	0.880742	3.57128e-05	0.0687601	0.876978
ENSMUSG00000042109.8	Csdc2	NA	0.880653	0.0007124	-0.188779	0.675693
ENSMUSG00000039844.19	Rapgef1	NA	0.878332	2.43612e-07	-0.272726	0.272446
ENSMUSG00000032125.20	Robo4	NA	0.87818	3.97925e-06	0.326961	0.224618
ENSMUSG00000053158.10	Fes	NA	0.877942	0.000470616	0.125866	0.790902
ENSMUSG00000069049.11	Eif2s3y	NA	0.877032	0.00396046	-0.601682	0.121393
ENSMUSG00000026615.14	Eprs	NA	0.8769	3.12783e-08	-0.081986	0.792852
ENSMUSG00000057054.11	Inca1	NA	0.874647	0.00200674	0.194173	0.700213
ENSMUSG00000034949.18	Zfr2	NA	0.87459	0.0180213	0.421938	0.43919
ENSMUSG00000024661.6	Fth1	NA	0.873484	1.4781e-07	0.230011	0.365257
ENSMUSG00000070407.5	Hs3st3b1	1	0.873458	0.0368066	-0.647482	0.26689
ENSMUSG00000069495.12	Epc2	NA	0.8728	0.000302214	-0.259534	0.504002
ENSMUSG00000040557.14	Wbscr27	NA	0.871968	0.017332	-0.0311353	0.97098
ENSMUSG00000027488.12	Snta1	NA	0.871288	4.47457e-07	0.136933	0.660024
ENSMUSG00000026790.19	Odf2	NA	0.870637	3.40504e-05	-0.423259	0.133266
ENSMUSG00000037608.16	Bclaf1	NA	0.870239	0.00026897	-0.100226	0.82996
ENSMUSG00000022383.13	Ppara	NA	0.866665	0.0223892	-0.614051	0.211719
ENSMUSG00000028970.9	Abcb1b	NA	0.866213	0.000930633	0.540247	0.108619
ENSMUSG00000058761.5	Rnf169	2	0.865321	0.000120254	0.0598587	0.903212
ENSMUSG00000026197.12	Zfand2b	NA	0.86529	0.000500386	0.480143	0.148311
ENSMUSG00000025142.17	Aspscr1	NA	0.865152	1.04042e-12	0.129317	0.54652
ENSMUSG00000027439.9	Gzf1	NA	0.864324	0.000109705	-0.256218	0.47039
ENSMUSG00000030748.9	Il4ra	NA	0.863982	6.0118e-05	0.614435	0.0170227
ENSMUSG00000032440.13	Tgfbr2	NA	0.861673	2.42747e-07	0.0556949	0.87548
ENSMUSG00000042215.8	Bag2	NA	0.861342	4.75741e-06	-0.193657	0.542963
ENSMUSG00000042616.8	Oscp1	NA	0.860663	0.032335	0.403708	0.501408
ENSMUSG00000030711.15	Sult1a1	NA	0.859201	0.00785367	0.321777	0.519923
ENSMUSG00000048249.14	Crebrf	NA	0.858418	0.000105109	-0.251923	0.471993
ENSMUSG00000015942.9	Gtf2ird2	NA	0.858301	0.00127579	-0.0439008	0.943825
ENSMUSG00000033777.3	Tlr13	NA	0.857905	0.0470682	-0.406076	0.558438
ENSMUSG00000021767.18	Kat6b	NA	0.857505	9.82314e-07	-0.463377	0.0394093
ENSMUSG00000068250.13	Amn1	NA	0.85716	0.00167439	0.218476	0.637948
ENSMUSG00000021981.10	Cab39l	NA	0.85696	0.00120396	-0.446198	0.216088
ENSMUSG00000032435.9	Dync1li1	NA	0.856624	1.01285e-06	-0.329163	0.179134
ENSMUSG00000027075.16	Slc43a1	NA	0.856584	0.039082	0.639101	0.231572
ENSMUSG00000027834.15	Serpini1	NA	0.856019	0.0023406	-0.198399	0.687156
ENSMUSG00000038193.4	Hand2	NA	0.855134	0.00189737	0.407019	0.289312
ENSMUSG00000032641.18	Gpr19	NA	0.85401	0.0243429	-0.0058456	0.994467
ENSMUSG00000032359.14	Ctsh	NA	0.853792	0.00046741	0.0330389	0.95346
ENSMUSG00000032702.16	Kank1	NA	0.853478	0.00953044	-0.500036	0.257129
ENSMUSG00000021785.8	Ngly1	NA	0.852919	4.67904e-06	-0.27031	0.334966
ENSMUSG00000020720.13	Psmd12	NA	0.852867	2.85763e-09	0.187318	0.414596
ENSMUSG00000021904.6	Sema3g	NA	0.851897	4.84543e-08	-0.0938161	0.757485
ENSMUSG00000019505.7	Ubb	NA	0.851849	9.88464e-10	0.102684	0.691734
ENSMUSG00000098134.1	Rnf113a2	NA	0.851594	0.000618967	0.0135646	0.982003
ENSMUSG00000022146.12	Osmr	NA	0.851033	0.00460937	0.563329	0.144018
ENSMUSG00000024925.10	Rnaseh2c	NA	0.850285	0.102936	1.25288	0.0242607
ENSMUSG00000044749.13	Abca6	NA	0.849094	0.00954209	-0.953602	0.0107381
ENSMUSG00000048186.14	Bend7	NA	0.847926	0.000523885	-0.390748	0.27431
ENSMUSG00000074825.4	Itpripl1	NA	0.847882	0.000178064	0.411964	0.178966
ENSMUSG00000031023.5	Akip1	NA	0.847674	0.000523743	0.619403	0.0388655
ENSMUSG00000034390.16	Cmip	NA	0.844843	7.45034e-05	-0.50637	0.0742889
ENSMUSG00000039474.13	Wfs1	NA	0.844784	1.15287e-06	-0.150349	0.625275
ENSMUSG00000073700.3	Klhl21	NA	0.844095	1.4114e-07	-0.407431	0.0493501
ENSMUSG00000028088.14	Fmo5	NA	0.844075	1.0398e-06	-0.448448	0.0433018
ENSMUSG00000033855.15	Ston1	NA	0.843644	0.035738	-0.899616	0.0555665
ENSMUSG00000022122.15	Ednrb	NA	0.842687	0.000255699	-0.00764835	0.989058
ENSMUSG00000024948.14	Map4k2	NA	0.842309	5.17375e-05	-0.254931	0.429452
ENSMUSG00000055148.7	Klf2	NA	0.841723	8.92258e-05	1.43082	2.82556e-11
ENSMUSG00000028124.15	Gclm	NA	0.839746	0.0136486	-0.611157	0.158225
ENSMUSG00000110195.1	Pde2a	NA	0.839664	6.14263e-08	0.268979	0.226581
ENSMUSG00000024535.15	Snx24	1	0.838735	0.000890565	-0.231623	0.590244
ENSMUSG00000026213.15	Stk11ip	NA	0.838507	0.000222433	-0.215407	0.574332
ENSMUSG00000031605.8	Klhl2	NA	0.838502	0.000802921	-0.342728	0.356774
ENSMUSG00000051343.11	Rab11fip5	NA	0.837355	2.762e-06	-0.432645	0.0593026
ENSMUSG00000031075.18	Ano1	NA	0.837178	4.5876e-05	-0.20974	0.53926
ENSMUSG00000018425.18	Dhx40	NA	0.835204	4.18586e-10	-0.339815	0.0620912
ENSMUSG00000048218.6	Amigo2	NA	0.834651	0.00223289	0.169548	0.730175
ENSMUSG00000025790.14	Slco3a1	NA	0.834622	2.13444e-09	-0.373952	0.0372029
ENSMUSG00000020847.15	Rph3al	NA	0.8342	0.00445466	-0.516947	0.199527
ENSMUSG00000042594.16	Sh2b3	NA	0.833231	1.59937e-07	0.332023	0.124475
ENSMUSG00000047648.13	Fbxo30	NA	0.832867	0.00434566	-0.177474	0.731403
ENSMUSG00000027014.14	Cwc22	NA	0.832718	0.000388221	-0.175383	0.674151
ENSMUSG00000030287.15	Itpr2	NA	0.832652	0.00101729	-0.794197	0.00663605
ENSMUSG00000035004.3	Igsf6	NA	0.832609	0.0401266	-0.30702	0.660024
ENSMUSG00000079018.10	Ly6c1	NA	0.832572	5.91267e-05	0.586473	0.0182748
ENSMUSG00000020072.15	Pbld2	NA	0.831184	0.0409565	-0.787586	0.124572
ENSMUSG00000021294.7	Kif26a	1	0.831101	0.003324	0.0281807	0.966979
ENSMUSG00000071347.3	C1qtnf9	NA	0.829746	2.7721e-05	0.603507	0.0100132
ENSMUSG00000013846.10	St3gal1	NA	0.829529	0.000366065	0.101444	0.821433
ENSMUSG00000066613.14	Zfp932	NA	0.828638	0.0113255	0.416215	0.384404
ENSMUSG00000055322.15	Tns1	NA	0.828365	1.30478e-05	-0.40606	0.102547
ENSMUSG00000033326.15	Kdm4a	1	0.827984	1.07582e-11	-0.238193	0.182669
ENSMUSG00000045466.18	Zfp956	NA	0.827928	0.0447803	-0.122466	0.879071
ENSMUSG00000041870.16	Ankrd13a	NA	0.827437	2.95101e-06	0.233792	0.395136
ENSMUSG00000020092.9	Pald1	NA	0.827275	3.56494e-05	0.0294337	0.951233
ENSMUSG00000054716.4	Zfp771	NA	0.826803	0.0310808	-0.123002	0.866539
ENSMUSG00000009291.13	Pttg1ip	NA	0.826508	3.28118e-11	-0.107774	0.638462
ENSMUSG00000042978.10	Sbk1	NA	0.82638	0.00298408	-0.351164	0.387179
ENSMUSG00000038132.6	Rbm24	NA	0.825167	0.000173683	-0.162768	0.673227
ENSMUSG00000001156.9	Mxd1	2	0.82469	0.000344224	-0.48274	0.125056
ENSMUSG00000026748.13	Plxdc2	NA	0.823343	0.00165659	0.314882	0.425468
ENSMUSG00000025190.13	Got1	NA	0.822128	8.4639e-08	-0.259478	0.239851
ENSMUSG00000021557.15	Agtpbp1	NA	0.821959	2.45076e-09	-0.19828	0.350032
ENSMUSG00000018449.12	Rpain	NA	0.821711	0.000400631	0.643523	0.0192793
ENSMUSG00000039943.16	Plcb4	NA	0.821689	1.0701e-12	-0.25004	0.121742
ENSMUSG00000019790.17	Stxbp5	NA	0.820926	3.86516e-06	-0.45254	0.0485463
ENSMUSG00000000093.6	Tbx2	NA	0.81948	0.000662651	0.251981	0.517373
ENSMUSG00000028826.14	Tmem57	NA	0.819067	8.66695e-05	-0.0774623	0.855618
ENSMUSG00000093962.7	RP23-292J1.3	NA	0.81896	0.0255466	0.187433	0.772991
ENSMUSG00000043424.10	Eif3j2	NA	0.817994	9.79511e-05	-0.344831	0.248272
ENSMUSG00000056313.5	RP23-310J6.1	NA	0.817647	0.00170142	0.888615	0.00199035
ENSMUSG00000030411.16	Nova2	NA	0.81746	0.000805716	0.265329	0.493579
ENSMUSG00000010095.13	Slc3a2	NA	0.817321	1.89405e-08	0.173239	0.473371
ENSMUSG00000048120.16	Entpd1	NA	0.817151	0.00231812	-0.228518	0.612906
ENSMUSG00000018819.10	Lsp1	NA	0.815903	0.00314985	0.458666	0.213665
ENSMUSG00000020541.12	Tom1l1	NA	0.815835	6.8908e-05	-0.253245	0.434728
ENSMUSG00000008307.11	AC090443.3	NA	0.815303	0.0231583	-0.4114	0.445088
ENSMUSG00000043251.6	Exoc3l	NA	0.814937	0.00568334	0.789193	0.0197387
ENSMUSG00000026074.15	Map4k4	2	0.814685	7.82709e-06	-0.501026	0.0260499
ENSMUSG00000030987.5	Stim1	NA	0.814119	0.000125063	-0.120452	0.762506
ENSMUSG00000031502.11	Col4a1	2	0.813934	9.16604e-07	-0.045641	0.901125
ENSMUSG00000038116.16	Phf20	NA	0.813904	7.76102e-08	0.0530264	0.870926
ENSMUSG00000008301.11	Phax	NA	0.813504	0.000225068	0.199297	0.596598
ENSMUSG00000030158.12	Clec12b	NA	0.813279	0.0419613	-0.156262	0.836063
ENSMUSG00000025027.17	Xpnpep1	NA	0.812867	4.1739e-09	0.15445	0.511228
ENSMUSG00000034430.16	Zxdc	NA	0.812315	6.63195e-05	-0.273084	0.378774
ENSMUSG00000020936.8	Nmt1	NA	0.811703	2.18532e-06	-0.242002	0.347818
ENSMUSG00000038291.16	Snx25	NA	0.810098	0.0253538	0.0922333	0.900246
ENSMUSG00000038290.15	Smg6	NA	0.809403	6.38218e-07	-0.3128	0.17157
ENSMUSG00000029815.12	Malsu1	NA	0.808677	0.000100864	0.360333	0.211591
ENSMUSG00000037958.13	Nsrp1	NA	0.808443	0.0170245	0.200296	0.732013
ENSMUSG00000034480.18	Diaph2	NA	0.808431	0.00163144	-0.470068	0.167644
ENSMUSG00000057130.11	Txnl4a	NA	0.808314	0.00010553	0.482406	0.0656765
ENSMUSG00000032350.9	Gclc	NA	0.807685	0.00109218	-0.152916	0.732976
ENSMUSG00000025184.10	R3hcc1l	NA	0.807102	0.00192524	0.0322304	0.959362
ENSMUSG00000005625.15	Psmd4	NA	0.806988	4.16752e-05	0.282387	0.326778
ENSMUSG00000054302.15	Eapp	NA	0.806876	0.000314573	0.223785	0.540005
ENSMUSG00000030972.6	Acsm5	NA	0.806323	0.0272942	0.0356305	0.966243
ENSMUSG00000020530.14	Ggnbp2	NA	0.80568	2.7605e-05	0.125658	0.720023
ENSMUSG00000047881.14	Rell1	NA	0.805497	0.000661578	0.254436	0.503368
ENSMUSG00000038593.18	Tctn1	NA	0.803154	5.63452e-05	-0.0349008	0.942016
ENSMUSG00000007122.11	Casq1	NA	0.803074	0.0318819	1.37876	0.000214127
ENSMUSG00000029229.8	Chic2	1	0.802534	0.000661578	-0.244437	0.526213
ENSMUSG00000041417.15	Pik3r1	1	0.801466	0.0137086	-0.807747	0.0321034
ENSMUSG00000034898.16	Filip1	NA	0.800988	9.54056e-07	-0.594947	0.00191248
ENSMUSG00000022584.14	Ly6c2	NA	0.800146	0.000208426	0.407594	0.16247
ENSMUSG00000006169.19	Clint1	NA	0.799542	5.84042e-06	-0.392071	0.0919401
ENSMUSG00000018171.9	Vmp1	NA	0.799011	2.63228e-06	-0.0367965	0.925834
ENSMUSG00000006476.19	Nsmf	NA	0.798655	0.00096604	0.412938	0.206152
ENSMUSG00000037235.13	Mxd4	1	0.79852	2.6299e-05	0.0848058	0.820294
ENSMUSG00000038244.13	Mical2	NA	0.796783	1.39464e-05	0.135092	0.680084
ENSMUSG00000057315.14	Arhgap24	NA	0.796489	0.00199333	-0.0218712	0.971079
ENSMUSG00000033739.8	Fkbpl	NA	0.796258	0.022261	0.0252103	0.974221
ENSMUSG00000059791.14	Nrm	NA	0.795376	0.0897287	1.56031	0.000633317
ENSMUSG00000068114.7	Ccdc134	NA	0.794764	0.0067077	0.379757	0.362643
ENSMUSG00000038456.9	Dennd2a	NA	0.793668	0.0135648	0.238222	0.657262
ENSMUSG00000039737.11	Prkrip1	NA	0.792353	0.00353037	0.319175	0.443544
ENSMUSG00000025821.9	Zfp282	2	0.790909	0.00110155	0.0217018	0.970422
ENSMUSG00000039701.11	Usp53	NA	0.790155	9.56329e-05	0.113348	0.769376
ENSMUSG00000042133.16	Ppig	NA	0.789993	0.0304689	-0.520596	0.281182
ENSMUSG00000023764.18	Sfi1	NA	0.789904	0.0119962	0.352276	0.448478
ENSMUSG00000060477.14	Irak2	NA	0.789778	0.00305046	-0.143589	0.771281
ENSMUSG00000025793.16	Hgs	NA	0.789039	0.00246687	-0.416928	0.251082
ENSMUSG00000044475.14	Ascc1	NA	0.788907	5.94083e-07	0.241268	0.30795
ENSMUSG00000057963.9	Itpk1	NA	0.788626	0.000133619	-0.22037	0.522392
ENSMUSG00000112129.1	Pbld1	NA	0.787631	0.00747452	-0.105304	0.855852
ENSMUSG00000024197.9	Plin3	NA	0.787261	1.4517e-08	-0.309152	0.0985629
ENSMUSG00000036381.13	P2ry14	NA	0.786871	0.00371175	0.256609	0.563464
ENSMUSG00000027206.13	Cops2	NA	0.786353	1.70428e-05	-0.180454	0.55512
ENSMUSG00000003581.14	Rnf215	NA	0.786034	2.72424e-06	0.381275	0.0862746
ENSMUSG00000070697.4	Utp3	NA	0.785672	0.000188144	0.114064	0.774827
ENSMUSG00000030347.6	RP23-222G22.7	NA	0.785503	0.000205457	0.625257	0.0121749
ENSMUSG00000029178.14	Klf3	NA	0.785485	4.45083e-06	-0.611023	0.00219218
ENSMUSG00000040659.3	Efhd2	NA	0.785173	0.000115535	0.306794	0.293067
ENSMUSG00000041598.7	Cdc42ep4	NA	0.784056	0.000252152	0.39636	0.167322
ENSMUSG00000032666.16	AC166332.1	NA	0.783941	0.000500677	0.108176	0.797979
ENSMUSG00000029223.12	Uchl1	NA	0.783835	0.00214386	0.198733	0.651366
ENSMUSG00000022009.1	Nufip1	NA	0.782568	0.00144917	0.133178	0.773577
ENSMUSG00000030222.13	Rerg	NA	0.78253	0.0389641	0.0345098	0.968963
ENSMUSG00000034731.10	Dgkh	1	0.782408	0.000886728	-0.573438	0.0518353
ENSMUSG00000041268.17	Dmxl2	NA	0.781674	0.00018693	-0.477096	0.0742902
ENSMUSG00000024014.7	Pim1	NA	0.781366	5.13283e-05	-0.432079	0.0887405
ENSMUSG00000055447.19	Cd47	NA	0.781284	3.63203e-05	0.0319828	0.942805
ENSMUSG00000040717.6	Il17rd	NA	0.780886	0.000222433	0.129931	0.740475
ENSMUSG00000019278.5	Dpep1	NA	0.780686	0.000107918	0.178175	0.60472
ENSMUSG00000020412.16	Ascc2	NA	0.779749	9.52658e-10	-0.0520777	0.849314
ENSMUSG00000033228.8	Scaf11	NA	0.77839	1.11718e-08	-0.277979	0.145218
ENSMUSG00000019979.12	Apaf1	NA	0.778276	0.0404694	0.0677893	0.932031
ENSMUSG00000020435.17	Osbp2	NA	0.778022	4.70009e-07	-0.293368	0.183042
ENSMUSG00000026393.10	Nek7	NA	0.777593	0.000784396	-0.250596	0.49188
ENSMUSG00000060981.7	Hist1h4h	NA	0.776431	0.00685581	0.508107	0.172465
ENSMUSG00000017132.17	Cyth1	NA	0.775931	4.20479e-09	0.0824249	0.748236
ENSMUSG00000002486.15	Tchp	NA	0.775631	0.00404124	-0.0212678	0.973496
ENSMUSG00000032849.14	Abcc4	NA	0.775346	0.000764713	-0.395685	0.213382
ENSMUSG00000040022.14	Rab11fip2	NA	0.774785	0.000890565	-0.401035	0.213642
ENSMUSG00000024074.7	Crim1	NA	0.774552	0.000143454	-0.0772945	0.851753
ENSMUSG00000090213.1	Tmem189	NA	0.774015	7.15806e-10	0.060064	0.815197
ENSMUSG00000022136.8	Dnajc3	NA	0.773826	5.35219e-07	0.163011	0.528629
ENSMUSG00000020423.6	Btg2	2	0.77226	0.0097585	1.00693	0.00171777
ENSMUSG00000028745.18	Capzb	NA	0.771771	9.82239e-10	0.227818	0.209143
ENSMUSG00000022389.15	Tef	NA	0.771335	2.03992e-05	0.759285	0.000128507
ENSMUSG00000058486.11	Wdr91	NA	0.771211	0.00120227	-0.428684	0.192302
ENSMUSG00000024780.7	Cdc37l1	NA	0.770997	0.0001711	-0.31407	0.280487
ENSMUSG00000031627.9	Irf2	NA	0.770881	0.000475419	-0.0339395	0.947311
ENSMUSG00000049878.13	Rlf	1	0.770588	0.000351722	-0.199124	0.584524
ENSMUSG00000036721.14	Zscan12	NA	0.770568	0.0056444	-0.0743033	0.900049
ENSMUSG00000030269.14	Mtmr14	NA	0.770529	1.76281e-07	0.0820658	0.778408
ENSMUSG00000024991.7	Eif3a	NA	0.770154	7.38567e-06	-0.296172	0.219431
ENSMUSG00000060591.9	Ifitm2	NA	0.76916	5.365e-05	0.948576	2.25884e-06
ENSMUSG00000042729.10	Wdr74	NA	0.768142	4.68289e-05	0.275393	0.32413
ENSMUSG00000018217.12	Pmp22	1	0.767887	4.12055e-06	0.493401	0.0145557
ENSMUSG00000062352.13	Itgb1bp1	NA	0.76775	6.76075e-06	0.462646	0.0291314
ENSMUSG00000034908.16	Sidt2	1	0.767744	0.00112323	-0.716917	0.00801673
ENSMUSG00000046447.3	Camk2n1	NA	0.766329	0.00079625	-0.105117	0.808395
ENSMUSG00000021895.10	Arhgef3	NA	0.765904	1.31989e-07	0.139366	0.584512
ENSMUSG00000029710.15	Ephb4	NA	0.765768	4.70009e-07	0.0418671	0.901824
ENSMUSG00000024066.8	Xdh	NA	0.765233	0.000498815	0.000488724	0.998828
ENSMUSG00000039982.7	Dtx4	2	0.764615	1.46405e-05	-0.259926	0.331951
ENSMUSG00000026042.16	Col5a2	2	0.764466	1.43982e-05	0.341987	0.153832
ENSMUSG00000039148.4	Sart1	NA	0.764074	5.66491e-06	0.137426	0.646816
ENSMUSG00000001128.7	Cfp	NA	0.76395	0.0298301	0.592951	0.182986
ENSMUSG00000020102.15	Slc16a7	1	0.76335	0.00428505	-0.664154	0.0478506
ENSMUSG00000037949.8	Ano10	NA	0.762966	0.00405747	0.14016	0.771329
ENSMUSG00000024854.3	Pold4	NA	0.762498	0.00212842	0.00498355	0.993129
ENSMUSG00000003865.16	Gys1	NA	0.762432	2.31438e-09	-0.285833	0.0974327
ENSMUSG00000048200.12	Cracr2b	NA	0.762346	0.0088406	0.441374	0.256802
ENSMUSG00000062198.5	RP23-454K24.1	NA	0.762114	3.14461e-06	0.315806	0.164876
ENSMUSG00000029228.15	Lnx1	NA	0.761584	1.10636e-05	0.403162	0.0734214
ENSMUSG00000074971.4	Fibin	NA	0.76141	0.0430868	-0.191399	0.773355
ENSMUSG00000074272.10	Ceacam1	NA	0.759437	0.00069084	-0.365921	0.237656
ENSMUSG00000049076.10	Acap2	NA	0.75883	9.49889e-06	-0.267032	0.285575
ENSMUSG00000032540.16	Abhd5	NA	0.757947	1.04032e-08	-0.071208	0.788164
ENSMUSG00000049488.14	Tmem67	NA	0.757438	0.0119961	-0.113301	0.851815
ENSMUSG00000024589.16	Nedd4l	NA	0.757324	9.82314e-07	-0.0873106	0.771329
ENSMUSG00000040220.10	Gas8	NA	0.75631	0.0256906	0.161016	0.790256
ENSMUSG00000040669.14	Phc1	1	0.756255	0.00320133	-0.0504527	0.928334
ENSMUSG00000037204.7	Atg101	NA	0.755507	0.00213633	0.688774	0.0154637
ENSMUSG00000028693.15	Nasp	3	0.755211	6.21994e-05	0.205282	0.502419
ENSMUSG00000029528.18	Pxn	NA	0.75515	1.47419e-08	0.175976	0.40388
ENSMUSG00000021418.15	Rpp40	NA	0.75506	0.0483778	0.550076	0.273053
ENSMUSG00000045790.10	Ccdc149	NA	0.754813	0.00155104	0.0940133	0.844066
ENSMUSG00000026288.14	Inpp5d	NA	0.753855	0.0242726	0.241988	0.663426
ENSMUSG00000006050.11	Sra1	NA	0.753815	5.31367e-06	0.290252	0.210483
ENSMUSG00000016918.15	Sulf1	NA	0.753587	0.000441869	0.904367	7.76869e-05
ENSMUSG00000015243.4	Abca1	NA	0.753411	0.00277493	-0.772882	0.00688444
ENSMUSG00000063808.14	Gpatch1	NA	0.752813	0.000281004	-0.24794	0.449611
ENSMUSG00000025812.17	Pard3	NA	0.751464	7.00457e-05	-0.68583	0.00159482
ENSMUSG00000021686.5	Ap3b1	NA	0.750694	0.000609918	0.105071	0.799749
ENSMUSG00000006920.14	Ezh1	NA	0.750372	6.36016e-05	-0.264608	0.337468
ENSMUSG00000016487.15	Ppfibp1	NA	0.75022	1.05668e-05	-0.45266	0.033016
ENSMUSG00000062127.11	Cttnbp2nl	NA	0.750112	0.000110421	-0.0311215	0.946163
ENSMUSG00000006014.16	Prg4	NA	0.750049	0.0348862	0.703147	0.0971962
ENSMUSG00000074264.12	Amy1	NA	0.749768	0.00352925	0.254722	0.529777
ENSMUSG00000026812.16	Tsc1	NA	0.74969	0.00012886	-0.610186	0.00814357
ENSMUSG00000015214.14	Mtmr1	NA	0.748847	0.0109058	-0.820765	0.0140903
ENSMUSG00000085795.8	Zfp703	NA	0.748776	0.0051111	0.0345165	0.955539
ENSMUSG00000021715.12	Cwc27	NA	0.748568	0.000767587	0.32727	0.303007
ENSMUSG00000037174.18	Elf2	1	0.747052	2.13537e-06	0.0490705	0.884101
ENSMUSG00000028530.14	Jak1	NA	0.745889	0.000113604	-0.344468	0.190124
ENSMUSG00000024899.6	Papss2	NA	0.745885	0.0021632	0.0929684	0.844932
ENSMUSG00000046598.14	Bdh1	1	0.745261	0.00282534	-0.308457	0.401875
ENSMUSG00000021690.10	Jmy	1	0.744781	2.38308e-05	-0.409014	0.0712284
ENSMUSG00000012114.16	Med15	NA	0.744764	1.69363e-06	-0.0993015	0.736523
ENSMUSG00000028988.13	Ctnnbip1	1	0.744683	0.00254126	0.318373	0.375616
ENSMUSG00000021116.10	Eif2s1	NA	0.744147	0.000701439	-0.166433	0.661282
ENSMUSG00000023092.16	Fhl1	NA	0.743832	0.00665271	0.667069	0.0391877
ENSMUSG00000037712.16	Fermt2	1	0.743798	5.19242e-06	-0.337354	0.121366
ENSMUSG00000029062.14	Cdk11b	NA	0.743681	1.96561e-09	0.00196087	0.994615
ENSMUSG00000020532.18	Acaca	NA	0.743627	0.0289589	-0.396633	0.414596
ENSMUSG00000041438.8	Utp4	NA	0.743618	5.42123e-07	-0.0686284	0.820294
ENSMUSG00000002833.11	Hdgfrp2	NA	0.74312	1.86067e-08	0.00174161	0.995688
ENSMUSG00000036106.15	Prr5	NA	0.742656	0.037975	0.231248	0.699952
ENSMUSG00000069729.13	Arid1b	NA	0.742389	4.43519e-05	-0.562806	0.00963009
ENSMUSG00000034154.15	Ino80	NA	0.742389	2.69349e-06	-0.0652653	0.840814
ENSMUSG00000055917.15	Zfp277	NA	0.740394	4.8409e-05	0.0351981	0.933692
ENSMUSG00000002250.15	Ppard	1	0.739222	1.70535e-05	-0.226548	0.395389
ENSMUSG00000032198.9	Dock6	NA	0.738963	0.000419281	0.127093	0.737977
ENSMUSG00000074582.10	Arfgef2	1	0.738708	0.000794066	-0.578798	0.0287664
ENSMUSG00000041729.15	Coro2b	NA	0.738489	4.30542e-05	-0.0340781	0.934823
ENSMUSG00000063558.4	Aox1	NA	0.738073	0.00103623	0.193072	0.610807
ENSMUSG00000034007.10	Scaper	NA	0.737425	2.53223e-05	-0.370248	0.117968
ENSMUSG00000021144.14	Mta1	NA	0.73635	0.000245913	-0.195923	0.553717
ENSMUSG00000021180.9	Rps6ka5	NA	0.736126	0.00288481	-0.203401	0.632277
ENSMUSG00000020220.16	Vps13d	1	0.734526	3.94242e-08	0.0419872	0.884151
ENSMUSG00000041057.9	Wdr43	NA	0.733563	0.000493983	-0.0778649	0.854717
ENSMUSG00000034165.16	Ccnd3	NA	0.733179	7.5595e-08	0.134982	0.566636
ENSMUSG00000031370.12	Zrsr2	NA	0.732769	8.34018e-05	0.083954	0.821713
ENSMUSG00000021149.8	Gtpbp4	NA	0.731931	0.000786083	0.0670206	0.879978
ENSMUSG00000038168.5	P3h2	NA	0.730399	0.0175896	-0.224042	0.667883
ENSMUSG00000001473.6	Tubb6	NA	0.729512	0.00319741	0.620982	0.0347262
ENSMUSG00000030996.8	Art1	NA	0.729216	0.000260826	0.519432	0.0320955
ENSMUSG00000025237.16	Parp6	NA	0.729215	2.12028e-05	0.254177	0.3185
ENSMUSG00000053799.6	Exoc6	NA	0.729181	1.45104e-07	-0.0651257	0.817785
ENSMUSG00000042485.7	Mustn1	NA	0.728799	0.0348448	0.711939	0.0795333
ENSMUSG00000041313.14	Slc7a1	1	0.728733	0.00352925	-0.171007	0.691358
ENSMUSG00000064080.12	Fbln2	NA	0.728455	2.92576e-05	0.357945	0.119715
ENSMUSG00000045248.6	Med26	1	0.728106	0.0108767	0.296275	0.499582
ENSMUSG00000028187.10	Rpf1	NA	0.727714	0.00118647	0.394694	0.192297
ENSMUSG00000055239.10	Kcmf1	NA	0.727406	8.58902e-08	-0.132548	0.574415
ENSMUSG00000029512.11	Ulk1	NA	0.72729	0.00068979	-0.485608	0.0700508
ENSMUSG00000020263.14	Appl2	NA	0.725739	0.000344352	0.0732246	0.857741
ENSMUSG00000034616.16	Ssh3	NA	0.725716	0.00291802	0.241031	0.537075
ENSMUSG00000019132.11	RP23-92G13.4	NA	0.725178	4.16198e-05	-0.257947	0.317139
ENSMUSG00000014444.17	Piezo1	NA	0.723509	0.00024043	0.0607963	0.881116
ENSMUSG00000025422.9	Agap2	NA	0.723423	0.00952362	0.0686727	0.905876
ENSMUSG00000034413.14	Neurl1b	NA	0.723042	0.00953517	0.50478	0.158049
ENSMUSG00000037805.14	Rpl10a	NA	0.722816	0.004265	0.757203	0.00775491
ENSMUSG00000029592.11	Usp30	NA	0.72266	0.000835322	-0.420611	0.147229
ENSMUSG00000042099.15	Kank3	NA	0.722658	0.00013335	0.470367	0.0439543
ENSMUSG00000039219.18	Arid4b	NA	0.722168	6.03731e-05	-0.22132	0.432577
ENSMUSG00000018372.13	Cep95	NA	0.719269	0.00781663	0.266825	0.529777
ENSMUSG00000022550.18	Adck5	NA	0.718075	0.0125168	0.36268	0.377154
ENSMUSG00000024603.8	Dctn4	NA	0.717708	1.41246e-05	-0.1808	0.504002
ENSMUSG00000033055.11	Ankrd54	NA	0.717707	0.0120805	0.104778	0.851753
ENSMUSG00000064145.12	Arih2	NA	0.716803	7.44159e-05	0.001605	0.996885
ENSMUSG00000049940.7	Pgrmc2	NA	0.716416	2.67958e-05	-0.0652032	0.852641
ENSMUSG00000032845.15	Alpk2	NA	0.714961	0.000109238	-0.530808	0.0160631
ENSMUSG00000025323.10	Sp4	NA	0.714497	0.024226	-0.787454	0.0341007
ENSMUSG00000050212.4	Eva1b	1	0.713711	0.0247395	0.68667	0.0651131
ENSMUSG00000035397.8	Klf16	NA	0.713157	0.0258815	0.730739	0.0482354
ENSMUSG00000000439.9	Mkrn2	NA	0.712863	0.000116819	-0.145604	0.653599
ENSMUSG00000047123.8	Ticam1	NA	0.712734	0.000600765	-0.0120253	0.980494
ENSMUSG00000028907.7	Utp11	NA	0.712186	2.88695e-05	0.214638	0.415997
ENSMUSG00000049439.13	Cyp20a1	NA	0.711957	0.00136811	-0.207649	0.576308
ENSMUSG00000034158.9	Lrrc58	NA	0.711931	0.0082259	-0.341088	0.376924
ENSMUSG00000037989.15	Wnk2	NA	0.71188	0.000437097	-0.544343	0.0253975
ENSMUSG00000031503.13	Col4a2	2	0.711561	3.68414e-06	0.0412829	0.903212
ENSMUSG00000103476.1	RP24-79E2.2	NA	0.711315	0.0371646	0.581261	0.169897
ENSMUSG00000028878.11	Fam76a	NA	0.71015	0.000123668	0.25441	0.35075
ENSMUSG00000020250.10	Txnrd1	NA	0.709822	0.0112073	-0.159522	0.745458
ENSMUSG00000007877.2	Tcap	NA	0.709632	3.63836e-05	1.17539	1.11448e-11
ENSMUSG00000025147.7	Mob2	NA	0.709288	1.1751e-05	0.128707	0.655967
ENSMUSG00000043290.6	Zfp784	NA	0.709205	0.0069527	0.118236	0.810923
ENSMUSG00000055980.2	Irs1	1	0.708567	0.0030644	-1.46163	9.44271e-10
ENSMUSG00000002307.15	Daxx	NA	0.70766	0.00600082	-0.0425781	0.941866
ENSMUSG00000092260.7	Zfp963	NA	0.707035	0.0484152	0.401377	0.433249
ENSMUSG00000015501.10	Hivep2	NA	0.706592	2.78192e-05	-0.324684	0.160414
ENSMUSG00000038895.16	Zfp653	NA	0.705582	0.010541	0.226601	0.620283
ENSMUSG00000028016.9	Ints12	NA	0.705091	0.00240942	-0.12078	0.781649
ENSMUSG00000004096.9	Cwc15	NA	0.703408	7.06007e-07	0.366284	0.0433018
ENSMUSG00000034593.16	Myo5a	NA	0.703137	0.013686	-0.259943	0.564426
ENSMUSG00000050730.17	Arhgap42	NA	0.702836	0.00268224	-0.0766309	0.872112
ENSMUSG00000030059.15	Tmf1	NA	0.702794	0.0169024	-0.453171	0.245537
ENSMUSG00000022466.6	Rpap3	NA	0.70113	0.000102597	-0.0776102	0.831263
ENSMUSG00000037519.17	Ppfia1	NA	0.70069	0.000289325	0.30996	0.251032
ENSMUSG00000030218.2	Mgp	NA	0.700495	0.00280255	0.922438	0.000202164
ENSMUSG00000040006.13	Ginm1	NA	0.700175	8.06981e-06	0.211056	0.377945
ENSMUSG00000022848.8	Dirc2	NA	0.69948	4.78789e-05	-0.41677	0.0554318
ENSMUSG00000000805.18	Car4	NA	0.699455	0.0103459	0.347057	0.367921
ENSMUSG00000026004.15	Kansl1l	NA	0.699449	0.000701439	-0.0996848	0.799241
ENSMUSG00000038143.16	Stox2	NA	0.699329	0.000610404	-0.478084	0.0630303
ENSMUSG00000034485.10	Uaca	NA	0.699021	0.000117234	0.0463886	0.905876
ENSMUSG00000030917.13	Tmem159	NA	0.697599	0.00459398	0.362266	0.285591
ENSMUSG00000029344.14	Tpst2	NA	0.697138	0.000292619	0.35415	0.168347
ENSMUSG00000004508.6	Gab2	NA	0.696794	0.000187528	-0.218045	0.455364
ENSMUSG00000025537.12	Phkg1	NA	0.696655	0.0305353	-0.220597	0.676256
ENSMUSG00000022897.14	Dyrk1a	NA	0.696439	0.000564163	-0.536824	0.027286
ENSMUSG00000025880.11	Smad7	NA	0.696373	0.0024382	0.31532	0.33486
ENSMUSG00000039852.17	Rere	1	0.696297	0.000105475	-0.331732	0.171669
ENSMUSG00000008822.15	Acyp1	NA	0.695885	0.0226619	0.420372	0.311438
ENSMUSG00000048489.12	RP24-171J16.5	NA	0.695832	0.000508126	1.8519	1.07253e-23
ENSMUSG00000029624.10	Ptcd1	NA	0.695807	0.000230015	-0.193198	0.53656
ENSMUSG00000038342.15	Mlxip	1	0.693639	0.000507006	-0.0403658	0.927789
ENSMUSG00000028409.11	Smu1	NA	0.693227	0.000104529	0.0821905	0.811557
ENSMUSG00000036553.16	Sh3tc1	NA	0.692759	0.0242455	0.116941	0.837651
ENSMUSG00000013089.15	Etv5	NA	0.69196	0.00430921	-0.237722	0.5377
ENSMUSG00000005198.15	Polr2a	NA	0.691923	1.66628e-05	-0.466522	0.016677
ENSMUSG00000002455.14	Prpf6	NA	0.691701	1.81973e-06	-0.0583221	0.845148
ENSMUSG00000038776.13	Ephx1	NA	0.691684	3.04004e-05	0.629044	0.000708138
ENSMUSG00000027660.16	Skil	NA	0.69149	0.000763017	-0.203988	0.545635
ENSMUSG00000027360.5	Hdc	NA	0.690601	0.0354618	-0.138286	0.818786
ENSMUSG00000004558.15	Ndrg2	NA	0.690426	1.12158e-06	-0.0243709	0.942641
ENSMUSG00000027465.13	Tbc1d20	NA	0.689902	2.26639e-07	0.00143736	0.996371
ENSMUSG00000028893.8	Sesn2	NA	0.6898	0.0231119	-0.418281	0.34297
ENSMUSG00000048271.14	Rbm33	NA	0.68918	8.67989e-05	-0.59259	0.00345592
ENSMUSG00000007872.3	Id3	NA	0.688413	3.21969e-05	0.653004	0.000372502
ENSMUSG00000028073.15	Pear1	NA	0.688248	0.000561276	0.136758	0.697884
ENSMUSG00000024792.8	Zfpl1	NA	0.688203	0.000473251	0.272769	0.34243
ENSMUSG00000030681.18	Mvp	NA	0.688041	3.16203e-07	0.610084	4.30614e-05
ENSMUSG00000028461.12	Ccdc107	NA	0.687983	0.00122095	0.584542	0.0193288
ENSMUSG00000060594.6	Layn	NA	0.687459	0.116892	1.06456	0.019824
ENSMUSG00000039715.8	Wdr34	NA	0.685709	0.00274441	-0.0639589	0.896205
ENSMUSG00000024892.16	Pcx	NA	0.68546	0.000541619	-0.50228	0.0391877
ENSMUSG00000032925.16	Itgbl1	NA	0.684416	0.013075	0.134474	0.788636
ENSMUSG00000021024.14	Psma6	NA	0.684131	1.24699e-06	0.216713	0.296222
ENSMUSG00000017747.13	Ghdc	NA	0.684012	0.00301106	-0.309427	0.365803
ENSMUSG00000028863.13	Meaf6	NA	0.683613	0.000827349	0.323003	0.254108
ENSMUSG00000031785.16	Adgrg1	NA	0.682553	0.00671555	0.138396	0.757497
ENSMUSG00000024799.15	Tm7sf2	NA	0.680311	0.000940296	0.173221	0.625275
ENSMUSG00000026650.15	Meig1	NA	0.680211	0.228061	1.65401	0.00114509
ENSMUSG00000040584.8	Abcb1a	NA	0.68011	2.46341e-06	-0.0144616	0.968963
ENSMUSG00000061740.8	Cyp2d22	NA	0.679806	5.42732e-06	-0.0751346	0.796037
ENSMUSG00000034037.14	Fgd5	NA	0.679753	0.000668217	0.279963	0.330606
ENSMUSG00000026463.17	Atp2b4	1	0.67906	0.000289166	-0.295093	0.264899
ENSMUSG00000063296.5	Tmem117	NA	0.678554	0.00337407	-0.114971	0.79028
ENSMUSG00000048478.7	Spata33	NA	0.677964	0.00544084	0.65637	0.0279913
ENSMUSG00000029101.15	Rgs12	NA	0.677423	3.50538e-05	0.0326732	0.931182
ENSMUSG00000032735.14	Ablim3	NA	0.67717	0.000321906	0.377556	0.122911
ENSMUSG00000035530.13	Eif1	NA	0.677011	4.92343e-06	0.347566	0.0676887
ENSMUSG00000073418.4	C4b	NA	0.676863	1.92666e-05	0.599973	0.000813857
ENSMUSG00000048799.7	Cep120	NA	0.67629	0.000358253	-0.118732	0.731403
ENSMUSG00000035047.9	Kri1	NA	0.676055	0.00687187	0.0299989	0.959574
ENSMUSG00000048416.15	Mlf1	1	0.675273	9.05076e-07	0.477863	0.00296216
ENSMUSG00000019828.13	Grm1	NA	0.67487	0.00771205	-0.0973215	0.839634
ENSMUSG00000031480.15	Thsd1	NA	0.67481	0.0131313	-0.128379	0.796385
ENSMUSG00000018076.12	Med13l	NA	0.674721	0.000248676	-0.598329	0.00518407
ENSMUSG00000040414.7	Slc25a28	NA	0.674663	0.00071256	0.298058	0.289302
ENSMUSG00000031393.16	Mecp2	NA	0.674327	0.000460743	-0.451961	0.0598872
ENSMUSG00000059920.9	RP23-32M15.2	NA	0.674245	1.19241e-05	-0.157498	0.545635
ENSMUSG00000040213.13	Ccbl2	NA	0.673825	0.000177948	-0.149062	0.633941
ENSMUSG00000021996.16	Esd	NA	0.673716	4.1499e-05	0.168779	0.52976
ENSMUSG00000032878.16	Ccdc85a	1	0.673372	0.007052	-0.143284	0.749831
ENSMUSG00000022442.16	Ttll1	NA	0.673201	0.000622554	0.280513	0.320023
ENSMUSG00000022750.17	Klhl22	NA	0.672988	0.000301794	-0.0623693	0.870216
ENSMUSG00000026155.13	Smap1	NA	0.672004	0.0155059	0.011531	0.985311
ENSMUSG00000032883.15	Acsl3	NA	0.671939	0.00306524	-0.581682	0.0439543
ENSMUSG00000004364.14	Cul3	NA	0.67188	4.16061e-05	-0.142544	0.616363
ENSMUSG00000020608.7	Smc6	NA	0.671605	0.000495542	-0.176124	0.588591
ENSMUSG00000020319.9	Wdpcp	NA	0.671279	0.0443882	-0.0481341	0.947771
ENSMUSG00000030432.12	Rpl28	NA	0.671191	1.39755e-05	0.886834	4.46984e-08
ENSMUSG00000024217.9	Snrpc	NA	0.670917	0.000193289	0.739681	0.000130203
ENSMUSG00000079620.13	Muc4	NA	0.670803	0.394287	1.90711	0.00817599
ENSMUSG00000022024.10	Sugt1	NA	0.670779	5.32058e-05	0.199409	0.441231
ENSMUSG00000053617.11	Sh3pxd2a	3	0.670121	9.07004e-06	-0.094138	0.738494
ENSMUSG00000021806.4	Nid2	NA	0.670018	0.0480359	0.0264294	0.971079
ENSMUSG00000024048.14	Myl12a	NA	0.669788	0.000463219	0.246694	0.384404
ENSMUSG00000021846.9	Peli2	NA	0.669787	0.00604051	0.151571	0.7216
ENSMUSG00000085793.2	Lin52	NA	0.669363	0.00486983	-0.108201	0.804967
ENSMUSG00000029598.12	Plbd2	NA	0.668951	9.63359e-05	-0.138729	0.643179
ENSMUSG00000030717.9	Nupr1	NA	0.668723	0.162735	1.06704	0.0320902
ENSMUSG00000032280.16	Tle3	NA	0.668571	0.00688464	0.605817	0.0359228
ENSMUSG00000028932.7	Psmc2	NA	0.668386	2.46671e-09	0.0232999	0.930278
ENSMUSG00000015971.5	Actr8	NA	0.668281	2.06052e-06	0.0370991	0.905803
ENSMUSG00000020709.15	Adap2	NA	0.668138	0.0135687	-0.676159	0.0391877
ENSMUSG00000029502.14	Golga3	NA	0.667907	0.000214198	-0.275775	0.281897
ENSMUSG00000013787.15	Ehmt2	NA	0.667611	2.68879e-05	0.253832	0.263792
ENSMUSG00000030603.16	Psmc4	NA	0.667386	1.1304e-06	0.217386	0.278221
ENSMUSG00000063146.11	Clip2	NA	0.667149	0.0131974	0.367599	0.323341
ENSMUSG00000024533.16	Spire1	NA	0.666669	0.0151375	-0.555983	0.109505
ENSMUSG00000026489.13	Adck3	NA	0.666492	0.000346954	-0.299246	0.24546
ENSMUSG00000071708.11	Sms	1	0.666221	0.000139416	-0.00827776	0.983946
ENSMUSG00000037736.18	Limch1	NA	0.665821	0.00327659	-0.180653	0.63585
ENSMUSG00000024805.16	Pcgf5	NA	0.66579	0.00161249	-0.0347807	0.942409
ENSMUSG00000039041.15	Adrm1	NA	0.665684	1.06544e-06	0.0695657	0.794229
ENSMUSG00000021428.9	Riok1	NA	0.665602	0.00396591	0.187869	0.623823
ENSMUSG00000002688.8	Prkd1	NA	0.663636	0.00902947	0.303578	0.417172
ENSMUSG00000023960.13	Enpp5	NA	0.663107	2.07393e-06	-0.00300133	0.993129
ENSMUSG00000023923.10	Tbc1d5	NA	0.663009	0.000525945	-0.365329	0.153419
ENSMUSG00000024335.19	Brd2	NA	0.661021	2.65456e-12	-0.19701	0.143157
ENSMUSG00000004535.12	Tax1bp1	NA	0.66071	5.81052e-07	-0.0124743	0.970017
ENSMUSG00000040711.7	Sh3pxd2b	NA	0.660563	0.0291415	-0.328818	0.465016
ENSMUSG00000052062.14	Pard3b	NA	0.660029	0.00163182	-0.0506151	0.911475
ENSMUSG00000027678.17	Ncoa3	1	0.659937	0.012969	-0.173909	0.699719
ENSMUSG00000045092.8	S1pr1	NA	0.659903	0.00384235	0.418537	0.156343
ENSMUSG00000018927.3	Ccl6	NA	0.6595	0.0242535	0.908357	0.00359789
ENSMUSG00000039318.12	Rab3gap2	NA	0.659317	1.02422e-05	-0.228288	0.304837
ENSMUSG00000010453.12	Kansl3	NA	0.658934	5.84967e-05	-0.107602	0.717348
ENSMUSG00000047649.9	Cd3eap	NA	0.658116	0.00552948	-0.33618	0.32413
ENSMUSG00000028140.13	Mrpl9	NA	0.657871	2.18967e-07	0.0231847	0.938986
ENSMUSG00000022124.15	Fbxl3	NA	0.657745	0.0087129	-0.262998	0.492911
ENSMUSG00000074749.10	Kiz	NA	0.657377	5.87182e-07	0.282548	0.110772
ENSMUSG00000045193.13	Cirbp	NA	0.656814	6.46254e-08	0.367287	0.0141811
ENSMUSG00000039959.13	Hip1	1	0.655587	3.63325e-07	0.0102451	0.974144
ENSMUSG00000063952.15	Brpf3	NA	0.655435	2.19379e-05	-0.00435155	0.991278
ENSMUSG00000035342.13	Lzts2	NA	0.655297	0.00016345	0.221276	0.400163
ENSMUSG00000030595.15	Nfkbib	NA	0.654458	0.000682925	0.203243	0.511158
ENSMUSG00000031803.8	B3gnt3	NA	0.653885	0.00830328	0.631685	0.0277303
ENSMUSG00000023919.7	Cenpq	NA	0.653798	0.019456	-0.607553	0.0905858
ENSMUSG00000043085.14	Tmem82	NA	0.653681	0.0561753	0.804445	0.035249
ENSMUSG00000030104.9	Edem1	NA	0.653044	0.0140264	0.0525506	0.926627
ENSMUSG00000022523.9	Fgf12	NA	0.652927	0.697974	3.59439	0.00730654
ENSMUSG00000026121.13	Sema4c	NA	0.652684	0.0281323	-0.184043	0.713931
ENSMUSG00000042423.9	Fbrs	1	0.652326	0.000122215	-0.0727623	0.828399
ENSMUSG00000007817.14	Zmiz1	1	0.651109	7.63444e-08	-0.532811	0.000102307
ENSMUSG00000035284.10	Vps13c	NA	0.650917	0.00613124	-0.330269	0.320969
ENSMUSG00000031536.6	Polb	NA	0.649745	7.32836e-05	0.231193	0.338181
ENSMUSG00000051335.6	Gfod1	1	0.649377	2.08556e-06	-0.353497	0.0442682
ENSMUSG00000026832.12	Cytip	NA	0.648679	0.4659	-1.76518	0.0476454
ENSMUSG00000006273.14	Atp6v1b2	NA	0.648476	1.54079e-06	-0.277336	0.129749
ENSMUSG00000091811.2	Inafm1	NA	0.648153	0.00783975	0.0839492	0.860186
ENSMUSG00000038859.7	Baiap2l1	NA	0.647666	0.00230044	-0.37985	0.1883
ENSMUSG00000021709.14	Erbb2ip	NA	0.647647	0.00486983	-0.333347	0.295261
ENSMUSG00000034595.17	Ppp1r18	NA	0.647536	0.00109868	0.422557	0.0933764
ENSMUSG00000095061.1	RP23-387F1.4	NA	0.647348	0.694225	-5.16544	0.0143896
ENSMUSG00000032803.15	Cdv3	NA	0.647256	3.44007e-06	-0.00535502	0.987658
ENSMUSG00000002799.6	Jag2	NA	0.647049	0.000509759	-0.237771	0.395744
ENSMUSG00000022306.9	Zfpm2	NA	0.647002	0.00335275	-0.804203	0.00107667
ENSMUSG00000073481.9	2018-03-02	NA	0.646854	7.01052e-05	0.442476	0.0251995
ENSMUSG00000032625.14	Thsd7a	NA	0.646421	0.0172563	0.149164	0.757486
ENSMUSG00000041712.7	Ubr7	NA	0.646317	3.09596e-06	-0.245941	0.213953
ENSMUSG00000024740.9	Ddb1	NA	0.645881	7.52477e-06	-0.138892	0.5701
ENSMUSG00000022237.17	Ankrd33b	NA	0.645762	0.000152544	-0.239957	0.339138
ENSMUSG00000034377.10	Tulp4	NA	0.645489	0.00128099	-0.46514	0.0601869
ENSMUSG00000029034.9	Ints11	NA	0.644679	0.00050687	0.196691	0.511158
ENSMUSG00000027905.15	Ddx20	NA	0.644052	0.000747216	-0.0670838	0.863442
ENSMUSG00000039480.14	Nt5dc1	NA	0.643893	0.0181803	-0.120945	0.807612
ENSMUSG00000053641.9	Dennd4a	1	0.643378	0.0269594	-0.354282	0.395772
ENSMUSG00000038195.6	Rilp	NA	0.643253	0.000392044	0.340438	0.158399
ENSMUSG00000106918.3	Mrpl33	NA	0.642806	2.0539e-07	0.48169	0.000629329
ENSMUSG00000003378.9	Grik5	NA	0.642447	0.00392526	0.334365	0.274684
ENSMUSG00000031714.9	Gab1	1	0.642158	0.000362615	-0.210267	0.451309
ENSMUSG00000003992.14	Ssbp2	NA	0.641049	0.00140847	-0.176064	0.602898
ENSMUSG00000033769.16	Exoc6b	NA	0.64064	0.000177996	0.131929	0.660393
ENSMUSG00000057738.13	Sptan1	1	0.639498	0.000292269	0.156391	0.600026
ENSMUSG00000096199.2	Ptrhd1	NA	0.639145	0.0388811	0.470603	0.237296
ENSMUSG00000021178.9	Psmc1	NA	0.638717	7.83167e-07	0.203713	0.28129
ENSMUSG00000026915.16	Strbp	NA	0.638186	0.00123266	-0.26667	0.357996
ENSMUSG00000021007.14	Spata7	NA	0.638069	0.0369847	-0.137121	0.806825
ENSMUSG00000038612.16	Mcl1	1	0.637389	3.88181e-06	0.0754005	0.776465
ENSMUSG00000006599.13	Gtf2h1	NA	0.63682	0.00166047	-0.204522	0.530799
ENSMUSG00000025584.17	Pde8a	NA	0.636605	0.000226529	-0.502283	0.0165594
ENSMUSG00000038535.17	Zfp280d	NA	0.636468	0.0106436	-0.374557	0.272589
ENSMUSG00000027333.18	Smox	NA	0.636361	0.00301106	0.21154	0.537937
ENSMUSG00000002500.15	Rpl3l	NA	0.635584	2.03863e-08	0.475661	0.000214807
ENSMUSG00000005950.14	P2rx5	NA	0.635574	2.05806e-05	0.075475	0.794426
ENSMUSG00000001175.14	Calm1	NA	0.634807	8.05553e-08	0.323647	0.0294798
ENSMUSG00000035007.5	Rundc1	NA	0.634465	0.0034088	-0.0948438	0.818786
ENSMUSG00000022089.9	Bin3	NA	0.634355	0.0229921	0.121478	0.809555
ENSMUSG00000086158.2	Ccpg1os	NA	0.6343	0.044245	0.140641	0.802135
ENSMUSG00000034252.14	Senp6	NA	0.633223	0.00106884	-0.0238949	0.959362
ENSMUSG00000028277.13	Ube2j1	NA	0.632924	0.0120446	0.0988889	0.833683
ENSMUSG00000048058.17	Ldlrad3	1	0.632645	0.0136486	0.0996717	0.837957
ENSMUSG00000024949.17	Sf1	NA	0.632238	1.6022e-06	-0.0483989	0.859784
ENSMUSG00000032548.14	Slco2a1	NA	0.632121	0.0359285	0.45742	0.236277
ENSMUSG00000040732.18	Erg	NA	0.631809	0.000464105	0.195713	0.49411
ENSMUSG00000018697.14	Aatf	NA	0.631198	0.0104061	0.294875	0.415397
ENSMUSG00000039886.8	Tmem120a	NA	0.630944	0.00763293	0.444462	0.140003
ENSMUSG00000070544.6	Top1	NA	0.630825	0.0016891	-0.00656335	0.989048
ENSMUSG00000039450.11	Dcxr	NA	0.630335	0.0118086	0.325124	0.355483
ENSMUSG00000037685.15	Atp8a1	NA	0.630139	0.00575694	-0.116162	0.779884
ENSMUSG00000026335.16	Pam	NA	0.629523	1.42473e-05	0.0816728	0.766312
ENSMUSG00000029681.12	Bcl7b	NA	0.628123	0.00108879	0.0752881	0.841282
ENSMUSG00000072623.6	Zfp9	NA	0.626976	0.0385404	-0.0881571	0.88156
ENSMUSG00000027365.14	Trpm7	NA	0.626957	0.00327382	-0.267214	0.394462
ENSMUSG00000003549.9	Ercc1	NA	0.626748	0.007052	0.545881	0.0493501
ENSMUSG00000021036.10	Sptlc2	NA	0.626498	0.000666205	0.607468	0.00337242
ENSMUSG00000037606.18	Osbpl5	NA	0.625776	0.000963527	0.333154	0.190588
ENSMUSG00000027510.17	Rbm38	NA	0.625579	0.00843622	-0.249786	0.490857
ENSMUSG00000019851.8	Perp	NA	0.625461	0.000101634	0.130661	0.641264
ENSMUSG00000026921.18	Egfl7	NA	0.623629	0.00137625	0.484353	0.0391877
ENSMUSG00000066621.12	Tecpr1	NA	0.623308	0.00180604	-0.276769	0.332862
ENSMUSG00000041378.1	Cldn5	NA	0.623074	0.0420771	0.225297	0.646816
ENSMUSG00000048807.2	Slc35e4	NA	0.621365	0.0266191	0.158473	0.747177
ENSMUSG00000005397.8	Nid1	NA	0.621329	0.00123808	-0.250791	0.372608
ENSMUSG00000029346.12	Srrd	NA	0.621188	0.0447733	0.29993	0.521132
ENSMUSG00000047454.12	Gphn	NA	0.621071	5.06777e-06	-0.0979461	0.696911
ENSMUSG00000036752.4	Tubb4b	NA	0.620727	0.00285137	-0.0701938	0.864232
ENSMUSG00000059824.12	Dbp	NA	0.620268	0.0179048	3.06586	4.53973e-45
ENSMUSG00000018442.13	Derl2	NA	0.62016	0.00140155	0.105734	0.766721
ENSMUSG00000001151.10	Pcnt	NA	0.619726	9.87117e-05	0.364725	0.0718988
ENSMUSG00000007656.13	Arpp19	1	0.619236	0.000277249	0.650598	0.000456552
ENSMUSG00000063160.12	Numbl	NA	0.618901	0.0181803	0.563427	0.0716673
ENSMUSG00000075227.6	Znhit2	NA	0.617525	0.0372226	0.0221973	0.973496
ENSMUSG00000034832.15	Tet3	7	0.617431	7.52526e-06	-0.153221	0.50339
ENSMUSG00000034620.17	Tmem5	NA	0.617255	0.00352925	-0.0286533	0.952927
ENSMUSG00000004667.18	Polr2e	NA	0.617126	0.000142468	0.487879	0.0102458
ENSMUSG00000066406.15	Akap13	1	0.61655	0.00277287	-0.320683	0.253222
ENSMUSG00000055850.12	Rnf181	NA	0.616467	5.23987e-06	0.243464	0.197025
ENSMUSG00000026478.14	Lamc1	1	0.616158	9.18006e-07	0.463342	0.00144502
ENSMUSG00000031565.18	Fgfr1	NA	0.616096	0.000459737	0.14556	0.629786
ENSMUSG00000074656.12	Eif2s2	NA	0.615976	7.00946e-05	0.253912	0.241814
ENSMUSG00000090258.7	Churc1	NA	0.615952	0.000168116	0.225897	0.347755
ENSMUSG00000057530.14	Ece1	NA	0.615833	3.12763e-06	-0.257913	0.153092
ENSMUSG00000033416.15	Gucd1	NA	0.615791	0.00199373	0.0714241	0.856443
ENSMUSG00000002546.16	Golga2	NA	0.615764	7.64106e-07	-0.16182	0.407396
ENSMUSG00000041375.18	Ccdc9	NA	0.615669	0.000230015	0.134501	0.646816
ENSMUSG00000006301.17	Tmbim1	NA	0.615529	1.72917e-07	0.169306	0.341486
ENSMUSG00000025068.7	Gsto1	NA	0.615496	1.19222e-06	0.232491	0.187607
ENSMUSG00000032519.11	Slc25a38	NA	0.615149	0.000936798	-0.17751	0.569206
ENSMUSG00000030750.13	Nsmce1	NA	0.615095	2.74044e-05	0.648525	4.74978e-05
ENSMUSG00000062901.2	Klhl24	NA	0.614988	0.00624873	-0.631924	0.0135725
ENSMUSG00000029642.11	Polr1d	NA	0.614329	0.000254714	0.348014	0.109353
ENSMUSG00000045969.8	Ing1	NA	0.613775	0.000195686	-0.171193	0.529539
ENSMUSG00000029627.12	Zkscan14	NA	0.613526	0.0224296	0.124926	0.79752
ENSMUSG00000022204.9	Ngdn	NA	0.613221	0.00170142	0.156782	0.641264
ENSMUSG00000058709.11	Egln2	NA	0.613204	0.00105289	0.142745	0.657778
ENSMUSG00000002102.15	Psmc3	NA	0.61313	2.63958e-07	0.254175	0.110772
ENSMUSG00000033453.8	Adamts15	1	0.613062	0.0354473	0.0251968	0.969855
ENSMUSG00000093674.7	Rpl41	NA	0.612906	0.000151888	0.756297	1.00137e-05
ENSMUSG00000002395.14	Use1	NA	0.612771	1.74942e-05	0.635914	4.1218e-05
ENSMUSG00000025495.15	Ptdss2	NA	0.612116	0.00265569	-0.383184	0.149062
ENSMUSG00000021660.14	Btf3	NA	0.61197	0.000263848	0.442019	0.0290885
ENSMUSG00000035949.15	Fbxw2	1	0.611965	1.88096e-06	0.02058	0.947221
ENSMUSG00000057604.9	Lmcd1	NA	0.611703	0.00247511	0.752898	0.000536428
ENSMUSG00000022064.10	Pibf1	NA	0.611675	0.0122008	-0.18774	0.655794
ENSMUSG00000027170.12	Eif3m	NA	0.611511	9.83945e-09	0.431752	0.000434409
ENSMUSG00000029458.14	Brap	NA	0.611398	4.01671e-05	0.0365605	0.912417
ENSMUSG00000018733.10	Pex12	NA	0.611302	0.00898467	-0.00641576	0.99121
ENSMUSG00000009905.5	Kdsr	NA	0.611295	0.0242726	0.0907747	0.859519
ENSMUSG00000015090.13	Ptgds	NA	0.609941	0.025031	-0.345721	0.356218
ENSMUSG00000069601.14	Ank3	1	0.609866	0.00851925	-0.200338	0.594692
ENSMUSG00000004056.15	Akt2	NA	0.609729	2.31626e-07	-0.0993003	0.639218
ENSMUSG00000039908.14	Slc26a11	NA	0.608698	0.0408604	-0.160364	0.758624
ENSMUSG00000022108.8	Itm2b	NA	0.60857	9.04219e-07	0.0369219	0.890289
ENSMUSG00000053333.15	Dis3l2	NA	0.607982	0.00175244	-0.098499	0.789457
ENSMUSG00000035529.10	Prdm4	NA	0.607444	0.00322355	-0.217355	0.50339
ENSMUSG00000059291.15	Rpl11	NA	0.607424	0.000113604	0.693415	4.18298e-05
ENSMUSG00000042472.11	Zfp410	NA	0.607395	0.000774891	-0.0477908	0.902259
ENSMUSG00000020817.16	Rabep1	NA	0.607269	0.000747216	-0.20919	0.452084
ENSMUSG00000022151.16	Ttc33	NA	0.606073	0.0216537	-0.215213	0.61576
ENSMUSG00000034055.16	Phka1	NA	0.606068	0.00293945	-0.301395	0.286236
ENSMUSG00000025225.14	Nfkb2	NA	0.604846	0.000496493	0.0449012	0.904643
ENSMUSG00000021039.9	Snw1	NA	0.604833	1.48259e-06	0.0468748	0.858785
ENSMUSG00000066233.6	Tmem42	NA	0.604668	0.00977539	0.0358947	0.946371
ENSMUSG00000000957.11	Mmp14	NA	0.6046	0.000159882	-0.238574	0.313937
ENSMUSG00000039483.10	Asb6	NA	0.604587	0.0226901	-0.155957	0.734163
ENSMUSG00000031930.11	Wwp2	NA	0.603796	1.76296e-06	-0.12402	0.571157
ENSMUSG00000037960.11	Card19	NA	0.603645	0.00186396	0.2054	0.498576
ENSMUSG00000035441.14	Myo1d	NA	0.602196	0.00997943	0.24146	0.499929
ENSMUSG00000022913.14	Psmg1	NA	0.601925	0.00209324	0.518173	0.0243182
ENSMUSG00000032555.10	Topbp1	NA	0.601132	0.00289881	-0.200869	0.540938
ENSMUSG00000033059.7	Pygb	NA	0.601045	2.08972e-07	0.332349	0.0201464
ENSMUSG00000006221.7	Hspb7	NA	0.600287	6.25588e-08	0.117603	0.527547
ENSMUSG00000089736.2	Tgfbr3l	NA	0.599698	0.0173674	0.593952	0.0400819
ENSMUSG00000023170.14	Gps2	NA	0.59947	0.00441995	0.039035	0.932962
ENSMUSG00000025609.15	Mkln1	NA	0.599215	0.000146022	-0.157464	0.544117
ENSMUSG00000015672.4	Mrpl32	NA	0.598906	0.00141118	0.367424	0.131401
ENSMUSG00000073079.6	Srp54a	NA	0.59886	0.00484635	-0.230184	0.478011
ENSMUSG00000035247.16	Hectd1	NA	0.598369	0.00180604	-0.426601	0.072621
ENSMUSG00000045409.16	Trim39	NA	0.597975	0.00762494	-0.0166451	0.974085
ENSMUSG00000075254.11	Heg1	NA	0.59767	1.06102e-05	-0.45514	0.00406149
ENSMUSG00000035696.15	Rnf38	NA	0.596658	0.00488477	-0.450851	0.0868683
ENSMUSG00000044791.16	Setd2	NA	0.59595	0.000765499	-0.0186201	0.96587
ENSMUSG00000007411.16	Mark3	1	0.595902	0.000345792	0.127103	0.662127
ENSMUSG00000029227.15	Fip1l1	NA	0.595104	6.39294e-05	-0.176222	0.455121
ENSMUSG00000055407.14	Map6	NA	0.594816	0.0856507	0.860998	0.01918
ENSMUSG00000032905.4	Atg12	NA	0.594755	9.65053e-06	-0.0871776	0.731578
ENSMUSG00000032232.14	Cgnl1	NA	0.594251	0.00316184	0.103815	0.778605
ENSMUSG00000034066.13	Farp2	1	0.59408	0.000166474	-0.121789	0.664493
ENSMUSG00000029730.16	Mcm7	NA	0.593663	0.00851114	-0.0870391	0.841083
ENSMUSG00000065954.11	Tacc1	NA	0.593398	3.69911e-08	-0.125713	0.482675
ENSMUSG00000029059.9	Fam213b	NA	0.593234	0.00210723	0.441805	0.0614262
ENSMUSG00000037936.15	Scarb1	NA	0.592726	0.00517097	-0.0202964	0.968515
ENSMUSG00000024534.15	Sncaip	NA	0.592627	0.0284395	0.511556	0.118551
ENSMUSG00000001134.9	Uxt	NA	0.592479	0.00700472	0.382054	0.181103
ENSMUSG00000035891.16	Cerk	NA	0.592432	4.21832e-05	0.000710421	0.998101
ENSMUSG00000023967.9	Mrps18a	NA	0.591978	0.000152972	0.21302	0.355154
ENSMUSG00000029407.10	Uso1	NA	0.591772	0.00131157	-0.0342523	0.933692
ENSMUSG00000002028.13	Kmt2a	NA	0.591638	0.00292068	-0.688395	0.00165366
ENSMUSG00000053931.11	Cnn3	NA	0.591575	8.47491e-05	0.325022	0.0941578
ENSMUSG00000062376.7	Borcs7	NA	0.591482	0.00361309	-0.000688558	0.998507
ENSMUSG00000020549.14	Elac2	NA	0.590663	0.000462061	-0.110865	0.71489
ENSMUSG00000033813.15	Tcea1	NA	0.590477	0.000105239	-0.0413342	0.901125
ENSMUSG00000015522.18	Arnt	1	0.590382	0.00188952	-0.309229	0.23259
ENSMUSG00000061898.10	Rbak	NA	0.588936	0.0420693	-0.299835	0.48875
ENSMUSG00000052040.10	Klf13	1	0.588053	0.010474	-0.0942856	0.826479
ENSMUSG00000049577.15	Zfpm1	NA	0.587988	0.00781919	-0.00471966	0.992989
ENSMUSG00000024346.5	Pfdn1	NA	0.587957	0.000200586	0.461103	0.0133261
ENSMUSG00000021693.20	Kif2a	NA	0.587652	0.007588	-0.475608	0.0817764
ENSMUSG00000030123.15	Plxnd1	NA	0.58753	0.0118173	0.281313	0.402075
ENSMUSG00000050017.11	Pitpnb	NA	0.587524	0.000206097	0.0341846	0.923479
ENSMUSG00000027566.14	Psma7	NA	0.587047	8.34883e-05	0.313539	0.105735
ENSMUSG00000024095.15	Hnrnpll	NA	0.586952	0.000270483	-0.154147	0.571804
ENSMUSG00000023150.14	Ivns1abp	NA	0.586639	1.1751e-05	-0.130847	0.559862
ENSMUSG00000019659.8	Ccdc12	NA	0.586572	0.000288588	0.536537	0.00337242
ENSMUSG00000027329.9	Spef1	NA	0.586541	0.0476598	0.279539	0.533196
ENSMUSG00000020457.13	Drg1	NA	0.586166	0.0152331	0.784414	0.00241182
ENSMUSG00000038975.14	Rabggtb	NA	0.585799	0.000467509	0.287698	0.204746
ENSMUSG00000029455.14	Aldh2	NA	0.585413	0.000198643	0.242865	0.273118
ENSMUSG00000024772.9	Ehd1	NA	0.585054	0.00117716	-0.00360538	0.993129
ENSMUSG00000024959.13	Bad	NA	0.584408	0.0161807	0.483149	0.105057
ENSMUSG00000027452.11	Acss1	NA	0.584259	7.64188e-05	-0.172416	0.454476
ENSMUSG00000038172.14	Ttc39b	NA	0.583997	0.00332062	-0.318181	0.243141
ENSMUSG00000013736.16	Trnt1	NA	0.583757	0.0058854	-0.462416	0.0781842
ENSMUSG00000022092.11	Ppp3cc	NA	0.583517	3.36084e-05	-0.011132	0.973967
ENSMUSG00000057113.13	Npm1	NA	0.583493	0.000246112	0.132965	0.626299
ENSMUSG00000020109.13	Dnajb12	NA	0.583467	8.53584e-05	-0.322015	0.0983887
ENSMUSG00000038611.17	Phrf1	NA	0.582909	0.0106897	0.382125	0.199352
ENSMUSG00000050556.9	Kcnb1	NA	0.582711	0.0303437	0.0128714	0.982773
ENSMUSG00000019899.16	Lama2	NA	0.582358	3.78151e-08	-0.10665	0.562143
ENSMUSG00000068749.9	Psma5	NA	0.582267	4.90386e-05	0.335515	0.0650136
ENSMUSG00000029014.14	Dnajc2	NA	0.581937	0.00076417	-0.00980259	0.980756
ENSMUSG00000047789.5	Slc38a9	NA	0.581924	0.000366619	-0.647857	0.000343342
ENSMUSG00000021913.8	Ogdhl	NA	0.581293	0.0111372	-0.0330599	0.94861
ENSMUSG00000020576.10	Nbas	NA	0.580431	0.000360389	-0.00866929	0.982308
ENSMUSG00000036661.14	Dennd3	NA	0.580215	0.00685581	-0.472145	0.0767213
ENSMUSG00000024754.12	Tmem2	NA	0.57997	0.0139448	0.157117	0.695431
ENSMUSG00000028820.13	Sfpq	1	0.579485	0.000824169	-0.209975	0.425011
ENSMUSG00000038065.13	Mturn	NA	0.579293	0.0124017	-0.0461925	0.926411
ENSMUSG00000028159.14	Dapp1	NA	0.578977	0.0260076	-0.180484	0.676206
ENSMUSG00000015202.13	Cnksr3	NA	0.578548	0.00277245	-0.159213	0.626299
ENSMUSG00000030816.8	Rnf40	NA	0.578513	0.000111516	0.200128	0.372159
ENSMUSG00000059142.15	Zfp945	NA	0.578409	0.00740952	0.448968	0.0905165
ENSMUSG00000003604.14	Aven	NA	0.578018	0.0220794	-0.0385225	0.944691
ENSMUSG00000011148.14	Adssl1	NA	0.576648	2.63855e-05	0.150417	0.497621
ENSMUSG00000028478.18	Clta	NA	0.576151	0.000782818	0.263629	0.271025
ENSMUSG00000071379.2	Hpcal1	NA	0.576108	0.0274238	0.369143	0.288526
ENSMUSG00000020717.19	Pecam1	NA	0.57604	8.45517e-05	0.031844	0.923034
ENSMUSG00000038722.17	Bud31	NA	0.576031	0.000339919	0.289278	0.181103
ENSMUSG00000042719.17	Naa25	NA	0.575729	0.00462275	-0.15009	0.663235
ENSMUSG00000020340.16	Cyfip2	NA	0.575622	0.025221	-0.36968	0.278435
ENSMUSG00000021824.13	Ap3m1	NA	0.575504	0.110483	-0.87584	0.0239466
ENSMUSG00000061787.15	Rps17	NA	0.575026	8.09206e-05	0.605894	0.000130203
ENSMUSG00000031980.9	Agt	NA	0.574958	0.312965	-1.56214	0.00462066
ENSMUSG00000042178.6	Armc5	NA	0.574399	0.000938911	-0.191428	0.494988
ENSMUSG00000038520.15	Tbc1d17	NA	0.574244	0.00190066	0.217692	0.437276
ENSMUSG00000115338.2	Pnp	NA	0.573794	0.0185441	0.680541	0.0109294
ENSMUSG00000000732.9	Icosl	NA	0.57368	0.009157	0.65497	0.00692423
ENSMUSG00000042790.16	Rnf214	1	0.573656	0.0170245	-0.365879	0.253611
ENSMUSG00000035944.17	Ttc38	NA	0.572694	0.00100618	-0.318037	0.17329
ENSMUSG00000029802.13	Abcg2	NA	0.572617	0.00908116	0.0122097	0.980472
ENSMUSG00000080268.3	Brms1	NA	0.57222	0.00387003	0.191511	0.546015
ENSMUSG00000048758.14	Rpl29	NA	0.572151	0.000140593	0.68913	1.6679e-05
ENSMUSG00000044477.11	Zfand3	NA	0.5717	6.94237e-05	-0.224675	0.271809
ENSMUSG00000020902.12	Ntn1	NA	0.571076	0.00123429	-0.494946	0.0168375
ENSMUSG00000036398.13	Ppp1r11	NA	0.57076	0.00771671	0.580033	0.0175043
ENSMUSG00000058624.12	Gda	NA	0.570033	0.0039141	-0.175877	0.589392
ENSMUSG00000034088.15	Hdlbp	NA	0.569773	8.46519e-05	-0.187892	0.388923
ENSMUSG00000015568.16	Lpl	1	0.569734	0.000351722	-0.25976	0.237084
ENSMUSG00000004070.15	Hmox2	NA	0.568696	8.40284e-05	0.167572	0.461812
ENSMUSG00000034243.16	Golgb1	NA	0.568585	0.000445239	-0.0724676	0.815732
ENSMUSG00000062997.6	Rpl35	NA	0.568509	0.000139788	0.717702	4.96925e-06
ENSMUSG00000034321.13	Exosc1	NA	0.568462	0.00607441	0.194292	0.560719
ENSMUSG00000029725.10	Ppp1r35	NA	0.568153	0.194794	1.15259	0.00708502
ENSMUSG00000030738.11	Eif3c	NA	0.567975	9.62165e-07	0.114394	0.562515
ENSMUSG00000021134.17	Srsf5	NA	0.56765	7.14979e-06	0.0313668	0.911177
ENSMUSG00000066705.7	Fxyd6	NA	0.566894	0.000179922	0.772715	8.31029e-07
ENSMUSG00000002885.14	Adgre5	NA	0.566713	0.00106399	-0.0493392	0.891075
ENSMUSG00000009470.17	Tnpo1	NA	0.566354	0.0273724	-0.624886	0.0331911
ENSMUSG00000022032.14	Scara5	NA	0.566344	0.0102057	-0.0450849	0.924643
ENSMUSG00000045078.12	Rnf216	NA	0.566223	0.000390561	-0.27084	0.220591
ENSMUSG00000037526.7	Atg14	NA	0.565945	0.00682235	0.115546	0.757486
ENSMUSG00000009585.18	Apobec3	NA	0.565932	0.00473992	0.23859	0.424549
ENSMUSG00000042524.14	Sun2	NA	0.565723	0.000452919	-0.462024	0.0150162
ENSMUSG00000052139.18	Bre	NA	0.565552	2.92694e-06	0.100739	0.642178
ENSMUSG00000020409.10	Slu7	NA	0.565432	0.000737373	-0.135312	0.64074
ENSMUSG00000019578.11	Ubxn6	NA	0.565407	0.000238266	0.161781	0.512582
ENSMUSG00000050064.14	Zfp697	NA	0.565165	0.0270906	0.367235	0.278347
ENSMUSG00000060036.14	Rpl3	NA	0.564537	8.59864e-05	0.473381	0.00408971
ENSMUSG00000038156.16	Spon1	NA	0.564088	0.000211951	0.254719	0.227397
ENSMUSG00000028041.17	Adam15	NA	0.563932	0.0110291	0.148756	0.691962
ENSMUSG00000046404.5	Yod1	NA	0.563663	0.00977539	0.154866	0.675497
ENSMUSG00000010517.7	Faf1	NA	0.563552	0.000206097	-0.170214	0.479966
ENSMUSG00000020803.3	Txndc17	NA	0.563102	8.65252e-05	0.34913	0.051988
ENSMUSG00000032501.9	Trib1	NA	0.563001	0.0268445	0.268542	0.475668
ENSMUSG00000009535.13	Rnmt	NA	0.562775	0.00977539	0.137703	0.714307
ENSMUSG00000006360.11	Crip1	NA	0.562713	0.0221851	0.89152	0.000412618
ENSMUSG00000038705.13	Gmeb2	NA	0.56271	0.0147747	-0.00866656	0.986848
ENSMUSG00000019971.10	Cep290	NA	0.562642	0.0294856	-0.00655173	0.991857
ENSMUSG00000038784.13	Cnot4	NA	0.562421	0.000394176	-0.0691069	0.823713
ENSMUSG00000002603.15	Tgfb1	NA	0.562331	0.00987372	0.206119	0.547039
ENSMUSG00000029169.11	Dhx15	NA	0.56225	0.000650038	-0.197651	0.433471
ENSMUSG00000028600.15	Podn	NA	0.562072	0.0961695	0.822176	0.0232412
ENSMUSG00000034575.13	Papd7	NA	0.561754	0.00344764	-0.185746	0.54941
ENSMUSG00000040913.10	Fbxw4	NA	0.561471	0.00247707	-0.022829	0.95961
ENSMUSG00000036257.15	Pnpla8	NA	0.561101	0.00247884	-0.252698	0.338181
ENSMUSG00000027375.14	Mal	NA	0.560953	0.0111067	0.0391105	0.935025
ENSMUSG00000039745.8	Htatip2	NA	0.56061	0.000851015	0.143631	0.617307
ENSMUSG00000029246.14	Ppat	NA	0.560232	0.00750106	0.0929893	0.808958
ENSMUSG00000028329.13	Xpa	NA	0.560205	0.0352591	-0.177198	0.695429
ENSMUSG00000028797.20	Tmem234	NA	0.558627	0.000210829	0.0324386	0.924016
ENSMUSG00000018583.5	G3bp1	NA	0.558087	4.31781e-07	0.0413102	0.857741
ENSMUSG00000015932.8	Dstn	NA	0.557599	0.000431689	0.0431953	0.897869
ENSMUSG00000024539.17	Ptpn2	NA	0.557197	0.00945065	-0.0154888	0.974512
ENSMUSG00000039656.16	Rxrb	NA	0.556979	0.000130108	-0.0239787	0.944188
ENSMUSG00000032006.15	Pdgfd	NA	0.556528	0.00659444	0.145852	0.67556
ENSMUSG00000026740.12	Dnajc1	NA	0.556216	0.0398941	-0.274381	0.492763
ENSMUSG00000007739.10	Cct4	NA	0.555939	3.03577e-06	0.133692	0.49188
ENSMUSG00000047141.5	ZNF654	NA	0.555899	0.0186989	-0.23712	0.515883
ENSMUSG00000023277.12	Twf2	NA	0.5551	0.0110635	0.0680693	0.87323
ENSMUSG00000028630.9	Dyrk2	NA	0.554566	0.00947225	-0.620812	0.0108235
ENSMUSG00000030126.17	Tmcc1	NA	0.554431	0.0195135	-0.00552336	0.992291
ENSMUSG00000029385.14	Ccng2	NA	0.554216	0.0400466	-0.599817	0.0577671
ENSMUSG00000040813.16	Tex264	NA	0.553799	0.00513364	0.0395527	0.927011
ENSMUSG00000027304.9	Rtf1	NA	0.553388	8.29299e-05	-0.231391	0.24684
ENSMUSG00000002409.18	Dyrk1b	NA	0.552942	0.0179147	-0.648534	0.0150162
ENSMUSG00000054619.7	Mettl7a1	NA	0.552731	0.000168432	-0.175231	0.446127
ENSMUSG00000050812.18	RP23-211P15.1	NA	0.552608	0.0103215	-0.521798	0.0391877
ENSMUSG00000019362.8	RP24-202L5.2	NA	0.552463	0.00113919	0.505823	0.00947987
ENSMUSG00000032965.10	Ift57	NA	0.552369	0.0362595	-0.161211	0.717783
ENSMUSG00000033486.14	Catsper2	NA	0.551929	0.00862219	-0.0560992	0.89899
ENSMUSG00000001995.9	Sipa1l2	NA	0.551514	7.63082e-05	-0.412648	0.0142074
ENSMUSG00000037211.12	Spry1	1	0.551011	0.00243394	0.240045	0.360054
ENSMUSG00000073982.11	Rhog	NA	0.55087	0.013297	0.512005	0.0510838
ENSMUSG00000020708.12	Psmc5	NA	0.550765	0.00271936	0.264475	0.303011
ENSMUSG00000037148.8	Arhgap10	NA	0.550476	1.94753e-05	-0.240384	0.177257
ENSMUSG00000042305.12	Tmem183a	1	0.550099	0.00375333	-0.342376	0.171947
ENSMUSG00000071711.12	Mpst	NA	0.550098	0.000152412	0.177674	0.429466
ENSMUSG00000031858.16	Mau2	NA	0.549832	0.000436067	-0.361976	0.0664563
ENSMUSG00000064210.7	Ano6	NA	0.549036	0.00157921	-0.101041	0.749709
ENSMUSG00000022707.16	Gbe1	NA	0.548941	0.017001	-0.309965	0.328808
ENSMUSG00000004040.16	Stat3	NA	0.548611	0.0184371	0.381018	0.20292
ENSMUSG00000070426.12	Rnf121	NA	0.548594	0.0136486	0.1829	0.615943
ENSMUSG00000024283.14	Wac	1	0.54838	0.0294729	-0.26196	0.482642
ENSMUSG00000027810.14	Eif2a	NA	0.548314	0.000227675	-0.020302	0.953614
ENSMUSG00000033429.10	Mcee	NA	0.548291	6.97327e-05	0.192216	0.344257
ENSMUSG00000036867.7	Smad6	NA	0.54818	0.0290582	-0.260892	0.493531
ENSMUSG00000018001.18	Cyth3	1	0.547788	0.000222433	0.0724657	0.79752
ENSMUSG00000066043.13	Phactr4	NA	0.547582	0.0169173	-0.0214293	0.968515
ENSMUSG00000029466.11	Anapc7	NA	0.547284	0.000446301	0.125052	0.644255
ENSMUSG00000020430.12	Pes1	NA	0.547257	0.000106496	-0.027186	0.932746
ENSMUSG00000037112.16	Sik2	NA	0.546903	0.0220306	-0.660793	0.0145557
ENSMUSG00000057367.12	Birc2	NA	0.546861	0.00563605	-0.0219605	0.963233
ENSMUSG00000053291.15	Rab4b	NA	0.546696	0.0225169	0.42797	0.154317
ENSMUSG00000024538.7	Ppic	1	0.546564	0.028184	0.429825	0.167771
ENSMUSG00000039849.5	Pcif1	NA	0.546266	0.000300307	0.271405	0.182439
ENSMUSG00000021619.6	Atg10	NA	0.546183	0.0148703	0.192645	0.594692
ENSMUSG00000036817.14	Sun1	NA	0.546106	2.17797e-05	-0.120066	0.586431
ENSMUSG00000027803.14	Wwtr1	NA	0.545893	3.27265e-05	-0.0851444	0.723516
ENSMUSG00000000628.10	Hk2	NA	0.545877	0.0163327	0.214186	0.541429
ENSMUSG00000033102.15	Cdc14b	NA	0.545288	0.0171809	-0.142768	0.716157
ENSMUSG00000023074.11	Mospd1	NA	0.545273	0.0197558	-0.246298	0.482932
ENSMUSG00000041777.12	Cir1	NA	0.544324	0.021441	-0.0384243	0.940559
ENSMUSG00000041096.13	Tspyl2	NA	0.544049	0.00297065	0.286274	0.252274
ENSMUSG00000071415.6	Rpl23	NA	0.543651	0.00860724	0.812775	0.00015684
ENSMUSG00000073702.11	Rpl31	NA	0.543627	0.00205212	0.775042	2.59772e-05
ENSMUSG00000044224.16	Dnajc21	NA	0.543595	0.000696249	0.00106679	0.997445
ENSMUSG00000036944.6	Tmem71	NA	0.543566	0.0350013	-0.287465	0.442872
ENSMUSG00000029480.13	Dhx37	NA	0.543406	0.00105398	-0.126698	0.660904
ENSMUSG00000025453.18	Nnt	NA	0.543197	0.0393795	-0.349129	0.322896
ENSMUSG00000018042.18	Cyb5r3	NA	0.542865	6.0118e-05	0.389799	0.0157839
ENSMUSG00000022837.13	Iqcb1	NA	0.542686	0.0154786	0.414286	0.144018
ENSMUSG00000025408.15	Ddit3	NA	0.542479	0.0293126	0.856075	0.000708138
ENSMUSG00000041241.12	Mul1	NA	0.54114	0.00281465	-0.00649188	0.987941
ENSMUSG00000054237.5	Fra10ac1	NA	0.540964	0.0317542	0.318477	0.357945
ENSMUSG00000021192.16	Golga5	NA	0.540908	0.00405747	-0.144727	0.652393
ENSMUSG00000042272.17	Sestd1	2	0.539989	0.00180827	-0.256475	0.291337
ENSMUSG00000059820.14	RP23-47M24.3	NA	0.539906	0.00369909	-0.00680859	0.987717
ENSMUSG00000028869.13	Gnl2	NA	0.53964	0.000390834	0.111946	0.675497
ENSMUSG00000039891.6	Txlnb	NA	0.539282	1.31331e-05	-0.277439	0.0828757
ENSMUSG00000051154.11	Commd3	NA	0.539	7.52164e-05	0.175095	0.398164
ENSMUSG00000018102.5	Hist1h2bc	NA	0.538943	0.000618967	0.143699	0.584631
ENSMUSG00000068240.5	RP23-24J10.5	NA	0.538823	0.00151023	0.658658	0.000303734
ENSMUSG00000006998.15	Psmd2	NA	0.538744	2.53959e-05	0.110837	0.617782
ENSMUSG00000029191.16	Rfc1	NA	0.538722	0.000122289	0.284014	0.124377
ENSMUSG00000039286.12	Fndc3b	NA	0.538501	0.0114854	-0.400203	0.13834
ENSMUSG00000025371.12	Chmp6	1	0.538497	0.0175788	0.131808	0.737705
ENSMUSG00000046985.11	Tapt1	NA	0.538134	0.00704053	-0.144223	0.669045
ENSMUSG00000062202.13	Btbd9	NA	0.538112	0.00932597	-0.154043	0.660393
ENSMUSG00000047656.8	Trpt1	NA	0.537941	0.0350013	0.624998	0.0285245
ENSMUSG00000028116.13	Myoz2	NA	0.537753	4.12234e-05	0.183882	0.339323
ENSMUSG00000040997.13	Abhd4	1	0.537465	0.00385896	-0.31775	0.198211
ENSMUSG00000028760.16	Eif4g3	NA	0.537153	0.00509234	-0.420865	0.0740931
ENSMUSG00000032252.14	Glce	NA	0.535813	0.000241591	0.0868923	0.749588
ENSMUSG00000041775.7	Mapk1ip1	NA	0.535611	0.0247395	0.244578	0.492079
ENSMUSG00000011114.18	Tbrg1	NA	0.534776	0.0048346	0.111475	0.740782
ENSMUSG00000028821.8	Syf2	NA	0.534031	6.66713e-05	0.410418	0.00887422
ENSMUSG00000049092.11	Gpr137c	NA	0.533994	0.165302	-1.1025	0.00550652
ENSMUSG00000028955.3	Vamp3	1	0.53334	0.000480534	0.357453	0.059057
ENSMUSG00000033159.14	Cnppd1	NA	0.532963	0.000571407	-0.0372431	0.912417
ENSMUSG00000024542.9	Cep192	NA	0.532845	0.0184647	0.107189	0.794872
ENSMUSG00000045854.4	Lyrm2	NA	0.532485	0.0365238	0.184899	0.655764
ENSMUSG00000010911.12	Apip	NA	0.532285	0.000803976	0.266271	0.219246
ENSMUSG00000012428.9	Steap4	NA	0.532162	0.000244849	-0.136918	0.573245
ENSMUSG00000017801.15	Mlx	NA	0.532106	0.0173051	0.163067	0.65704
ENSMUSG00000034563.16	Ccpg1	NA	0.531425	0.000495986	-0.0760516	0.79028
ENSMUSG00000025066.9	Sfr1	NA	0.531411	0.000346319	-0.149932	0.534019
ENSMUSG00000019518.10	Ap4m1	NA	0.531115	0.00827113	-0.15013	0.662429
ENSMUSG00000009927.9	Rps25	NA	0.530702	0.00176287	0.839267	1.35775e-06
ENSMUSG00000005362.14	Crbn	NA	0.530538	0.00388055	-0.183543	0.527773
ENSMUSG00000070319.6	Eif3g	NA	0.530531	0.000115847	0.278893	0.122365
ENSMUSG00000025949.16	Pikfyve	NA	0.530529	0.00988709	-0.709041	0.00189049
ENSMUSG00000028868.13	Wasf2	NA	0.530368	0.000276387	-0.187795	0.390441
ENSMUSG00000033845.13	Mrpl15	NA	0.530035	0.00448183	0.363701	0.123637
ENSMUSG00000030451.15	Herc2	NA	0.530017	0.0181249	-0.15808	0.670965
ENSMUSG00000041560.12	Gltscr2	NA	0.529308	0.000489688	0.311361	0.11063
ENSMUSG00000037415.6	Ranbp10	NA	0.529169	0.00161217	-0.0264556	0.945247
ENSMUSG00000023066.9	Rttn	NA	0.529139	0.0425743	-0.35111	0.334615
ENSMUSG00000063785.12	Utp14a	NA	0.528337	0.00503222	0.136218	0.672617
ENSMUSG00000038335.13	Tsr1	NA	0.528062	0.0478921	0.0252708	0.966965
ENSMUSG00000020719.14	Ddx5	NA	0.527403	9.04276e-07	0.0359975	0.873425
ENSMUSG00000037017.15	Zscan21	NA	0.52708	0.00196805	0.310869	0.165396
ENSMUSG00000048701.13	Ccdc6	NA	0.526916	0.000719617	-0.319761	0.116349
ENSMUSG00000036452.17	Arhgap26	NA	0.526195	0.00556859	-0.148372	0.641264
ENSMUSG00000033396.13	Spg11	NA	0.526148	0.00931803	-0.278497	0.327423
ENSMUSG00000040586.8	Ofd1	NA	0.525803	0.0116263	0.217759	0.495504
ENSMUSG00000030301.17	Ccdc91	NA	0.525458	0.000828312	-0.0556707	0.86036
ENSMUSG00000047036.8	Zfp445	NA	0.525454	0.00752236	-0.246105	0.383555
ENSMUSG00000021585.9	Cast	NA	0.525445	0.00111438	0.0278631	0.938818
ENSMUSG00000041445.9	Mmrn2	NA	0.525367	0.0425743	0.046882	0.930627
ENSMUSG00000020097.14	Sgpl1	NA	0.524723	0.000845575	-0.156946	0.539507
ENSMUSG00000020525.17	Ppm1d	1	0.524714	0.0198115	-0.0626662	0.890394
ENSMUSG00000034684.12	Sema3f	NA	0.524684	0.046206	0.0736137	0.883377
ENSMUSG00000060636.13	Rpl35a	NA	0.524528	0.00225197	0.883804	3.79629e-07
ENSMUSG00000024646.13	Cyb5a	NA	0.524146	0.00131144	0.30744	0.149182
ENSMUSG00000018481.9	Appbp2	1	0.524077	0.000327206	-0.38187	0.0351021
ENSMUSG00000044442.11	N6amt1	NA	0.523942	0.00531524	0.0458571	0.907566
ENSMUSG00000050299.7	Gm9843	NA	0.523938	0.00350374	0.734521	8.77436e-05
ENSMUSG00000027649.15	Ctnnbl1	NA	0.522837	0.0290569	-0.353022	0.271309
ENSMUSG00000035392.17	Dennd1a	NA	0.522836	8.01211e-05	-0.462003	0.00262437
ENSMUSG00000068798.10	Rap1a	NA	0.52224	0.000400631	-0.123944	0.623975
ENSMUSG00000021286.8	Zfyve21	NA	0.522234	0.00490823	-0.0689742	0.850117
ENSMUSG00000024151.13	Msh2	NA	0.522055	0.0162641	-0.0400712	0.932031
ENSMUSG00000039901.9	9130011E15Rik	NA	0.521788	0.003665	-0.0292422	0.943427
ENSMUSG00000070643.11	Sox13	NA	0.521637	0.00965364	0.277361	0.320969
ENSMUSG00000021482.10	Aaed1	NA	0.521567	0.00349466	-0.364056	0.106878
ENSMUSG00000069833.12	Ahnak	NA	0.521506	0.00579065	-0.0124858	0.976861
ENSMUSG00000042303.19	Sgsm3	NA	0.521218	0.0440314	0.117335	0.795469
ENSMUSG00000034463.4	Scara3	NA	0.52116	0.267785	1.03267	0.0259234
ENSMUSG00000046280.9	She	NA	0.521155	0.00956948	-0.182459	0.574332
ENSMUSG00000024853.9	Sf3b2	NA	0.520242	3.53036e-06	0.0619656	0.77388
ENSMUSG00000028809.16	Srrm1	NA	0.520125	0.00436714	-0.176237	0.540938
ENSMUSG00000008855.17	Hdac5	NA	0.519966	0.000990993	-0.103426	0.71103
ENSMUSG00000001768.15	Rin2	NA	0.519816	0.0382817	-0.128149	0.769623
ENSMUSG00000016933.17	Plcg1	NA	0.519344	0.000153828	-0.191334	0.342347
ENSMUSG00000050732.9	Vamp8	NA	0.518525	0.00360049	0.240003	0.342368
ENSMUSG00000054823.16	Nsd3	NA	0.518349	0.000450892	-0.236385	0.255228
ENSMUSG00000012296.16	Tjap1	NA	0.518283	0.00268322	0.409244	0.0506329
ENSMUSG00000027177.14	Hipk3	NA	0.517334	0.0686418	-0.650119	0.0402102
ENSMUSG00000023707.13	Ogfod2	NA	0.516793	0.0184562	-0.277575	0.378601
ENSMUSG00000006362.16	Cbfa2t3	NA	0.516537	0.0161406	-0.123523	0.741881
ENSMUSG00000042675.15	Ypel3	NA	0.516442	0.0453585	0.204004	0.617145
ENSMUSG00000021639.16	Gtf2h2	NA	0.516319	0.0168123	0.309783	0.292266
ENSMUSG00000036733.16	Rbm42	NA	0.516296	0.000363589	0.162495	0.477229
ENSMUSG00000040824.3	Snrpd2	NA	0.516075	0.00700039	0.66086	0.00123823
ENSMUSG00000041815.14	Poldip3	NA	0.515791	0.00373836	0.026801	0.947311
ENSMUSG00000067288.12	Rps28	NA	0.515384	0.00983419	0.612344	0.00518091
ENSMUSG00000036644.15	Tbc1d9b	NA	0.515253	0.00534353	-0.28625	0.252607
ENSMUSG00000019139.10	Isyna1	NA	0.515124	0.0430077	-0.21997	0.579578
ENSMUSG00000005823.8	Gpr108	NA	0.515097	0.000690953	0.0842995	0.764402
ENSMUSG00000060938.14	Rpl26	NA	0.515005	0.00402824	0.762022	4.28339e-05
ENSMUSG00000048376.6	F2r	NA	0.515004	0.000828807	-0.0826259	0.774804
ENSMUSG00000034274.11	Thoc5	NA	0.51414	0.0119962	0.287358	0.304083
ENSMUSG00000071655.11	Ubxn1	NA	0.514031	0.00147275	0.326025	0.113739
ENSMUSG00000030314.16	Atg7	NA	0.51403	0.0255466	0.198739	0.587063
ENSMUSG00000057506.4	Bloc1s2	NA	0.513956	0.0242833	0.0572747	0.90291
ENSMUSG00000038056.15	Kmt2c	NA	0.512734	0.0117327	-0.508137	0.0330649
ENSMUSG00000019978.16	Epb41l2	NA	0.512088	0.00708269	-0.106763	0.752153
ENSMUSG00000019897.8	Ccdc59	NA	0.512033	0.00642601	0.0974003	0.775566
ENSMUSG00000021264.12	Yy1	NA	0.511188	0.0076931	-0.00494293	0.99155
ENSMUSG00000003226.7	Ranbp2	NA	0.510886	0.0377486	-0.409237	0.184309
ENSMUSG00000046330.10	Rpl37a	NA	0.510682	0.00517359	0.708471	0.000222827
ENSMUSG00000022708.16	Zbtb20	1	0.510673	0.1235	-0.872661	0.0113842
ENSMUSG00000059273.9	Zc3h4	NA	0.510554	0.00222792	-0.375135	0.0698032
ENSMUSG00000020780.15	Srp68	NA	0.510425	0.000862148	0.191656	0.402075
ENSMUSG00000028568.16	Btf3l4	NA	0.510125	0.0128618	0.303737	0.268689
ENSMUSG00000027746.13	Ufm1	NA	0.510082	0.021028	-0.0462879	0.919687
ENSMUSG00000039159.16	Ube2h	1	0.510067	0.00117541	-0.259271	0.22679
ENSMUSG00000066894.14	Vsig10	NA	0.510018	0.0264866	-0.219966	0.534776
ENSMUSG00000000915.15	Hip1r	1	0.50999	0.0279503	-0.552423	0.0393832
ENSMUSG00000040462.13	Os9	NA	0.509438	0.000204318	0.240381	0.198037
ENSMUSG00000066551.12	Hmgb1	NA	0.509436	0.00195101	0.145579	0.591695
ENSMUSG00000068328.9	Aup1	NA	0.509311	0.00969537	0.290332	0.275619
ENSMUSG00000023959.8	Clic5	NA	0.508522	0.0317097	-0.424992	0.145982
ENSMUSG00000025920.19	Stau2	NA	0.508453	0.00227152	-0.128004	0.653334
ENSMUSG00000033793.12	Atp6v1h	NA	0.508347	0.00218841	-0.0286971	0.939304
ENSMUSG00000031479.9	Vps36	1	0.508159	0.00155104	0.113589	0.685288
ENSMUSG00000020009.12	Ifngr1	NA	0.507953	0.00264035	0.24338	0.303007
ENSMUSG00000028108.15	Ecm1	NA	0.507792	0.0346026	0.196231	0.605936
ENSMUSG00000021282.17	Eif5	NA	0.507686	0.0164789	-0.152702	0.662081
ENSMUSG00000049327.17	Setd8	1	0.507312	0.0213627	-0.046081	0.9198
ENSMUSG00000025612.5	Bach1	NA	0.506798	0.00913886	-0.0766737	0.834744
ENSMUSG00000031918.16	Mtmr2	NA	0.505942	0.00596915	-0.197593	0.490759
ENSMUSG00000033170.14	Card10	NA	0.505862	0.00295429	0.248821	0.292407
ENSMUSG00000034892.8	Rps29	NA	0.50545	8.69072e-06	0.753301	7.53584e-11
ENSMUSG00000020385.16	Clk4	NA	0.505337	0.0296464	0.0153984	0.976197
ENSMUSG00000013622.15	Atraid	NA	0.504833	0.000170686	0.411062	0.00850354
ENSMUSG00000024140.9	Epas1	NA	0.504439	2.15485e-06	-0.222379	0.117968
ENSMUSG00000009569.14	Mkl2	NA	0.50429	0.00257552	-0.0461744	0.894522
ENSMUSG00000039004.6	Bmp6	NA	0.504234	5.3689e-05	-0.0332667	0.903212
ENSMUSG00000001785.13	Pwp1	NA	0.504194	0.00871947	-0.148861	0.645486
ENSMUSG00000032263.14	Bckdhb	NA	0.503396	0.0301225	0.364548	0.22171
ENSMUSG00000070738.10	Dgkd	1	0.503379	0.00727998	-0.183124	0.533434
ENSMUSG00000029148.15	Nrbp1	NA	0.502882	2.98105e-05	0.0176629	0.951233
ENSMUSG00000030538.15	Cib1	NA	0.502658	0.0169341	0.18298	0.587052
ENSMUSG00000042121.16	Ssh1	NA	0.502477	0.0189508	-0.164421	0.642669
ENSMUSG00000060992.9	Copz1	NA	0.502254	5.84317e-05	-0.0182747	0.951233
ENSMUSG00000042870.15	Tom1	NA	0.501771	0.000351722	0.0958859	0.699721
ENSMUSG00000025532.13	Crcp	NA	0.501763	0.0141082	-0.253051	0.405611
ENSMUSG00000024515.13	Smad4	NA	0.50051	0.00156091	-0.186743	0.441244
ENSMUSG00000028234.6	Rps20	NA	0.500302	0.0051967	0.799634	1.30263e-05
ENSMUSG00000026208.9	Des	NA	0.50029	0.000219869	0.109935	0.638892
ENSMUSG00000036792.12	Mbd5	NA	0.500249	0.00968392	-0.683734	0.00135369
ENSMUSG00000043733.14	Ptpn11	NA	0.500246	0.0240175	-0.618599	0.0112349
ENSMUSG00000042198.12	Chchd7	NA	0.500204	0.00119646	0.342491	0.0756275
ENSMUSG00000070420.4	Zscan25	NA	0.50009	0.0457371	-0.400353	0.22321
ENSMUSG00000063019.5	Manbal	NA	0.49971	0.0260283	0.0955533	0.81531
ENSMUSG00000049517.8	Rps23	NA	0.499677	0.0108815	0.910277	3.4455e-06
ENSMUSG00000037907.16	Ankrd13b	1	0.49943	0.0315523	0.0661658	0.883451
ENSMUSG00000042688.16	Mapk6	NA	0.499011	0.0177039	-0.586452	0.013809
ENSMUSG00000026048.16	Ercc5	NA	0.498989	0.00331735	-0.160551	0.563863
ENSMUSG00000039680.9	Mrps6	NA	0.498979	0.0110278	0.356327	0.152689
ENSMUSG00000026571.12	Dcaf6	NA	0.498141	0.00423061	-0.254287	0.291701
ENSMUSG00000098274.7	Rpl24	NA	0.497166	0.00463211	0.661416	0.000389556
ENSMUSG00000064373.12	Sepp1	NA	0.496558	0.000176857	-0.207476	0.265595
ENSMUSG00000024975.12	Pdcd4	NA	0.496213	0.0438652	0.210644	0.581269
ENSMUSG00000041278.10	Ttc1	NA	0.495768	0.010657	-0.0115349	0.979118
ENSMUSG00000038563.14	Efl1	NA	0.495479	0.016659	0.0149925	0.974339
ENSMUSG00000020432.12	Tcn2	NA	0.495439	0.00400186	0.0984261	0.750205
ENSMUSG00000061104.5	RP23-264J18.3	NA	0.495336	0.000551631	0.306546	0.0921896
ENSMUSG00000033182.12	Kbtbd12	NA	0.49465	0.099041	-0.693108	0.0388655
ENSMUSG00000039156.19	Stim2	NA	0.494609	0.0341089	-0.0505493	0.915281
ENSMUSG00000039349.5	AC131992.1	NA	0.49416	0.018816	0.207166	0.517367
ENSMUSG00000040713.12	Creg1	NA	0.494023	0.000326662	0.163342	0.439344
ENSMUSG00000046873.18	Mbtps2	NA	0.493756	0.00910921	-0.533082	0.0135725
ENSMUSG00000040219.4	Ttc12	NA	0.493673	0.00512679	0.145343	0.620283
ENSMUSG00000010064.15	Slc38a3	NA	0.493346	0.012969	0.0665922	0.86133
ENSMUSG00000038696.14	Mapkap1	NA	0.493183	0.00189261	0.115379	0.672086
ENSMUSG00000068739.13	Sars	NA	0.493157	2.02479e-06	0.0864677	0.641242
ENSMUSG00000030541.16	Idh2	NA	0.492974	1.6756e-06	0.212342	0.123864
ENSMUSG00000041957.15	Pkp2	NA	0.492965	6.84158e-05	-0.140565	0.474713
ENSMUSG00000046876.16	Atxn1	1	0.492538	0.00268224	-0.263155	0.243745
ENSMUSG00000062963.10	Ufc1	NA	0.492367	0.00174127	0.400915	0.0326336
ENSMUSG00000031691.14	Tnpo2	NA	0.491985	0.0078862	-0.18409	0.523545
ENSMUSG00000027222.14	Pex16	NA	0.491335	0.0429583	0.175263	0.653992
ENSMUSG00000030737.17	Slco2b1	NA	0.491255	0.00364978	0.11388	0.697268
ENSMUSG00000014786.8	Slc9a5	NA	0.490784	0.150619	0.80067	0.0232412
ENSMUSG00000047412.16	Zbtb44	NA	0.49043	0.0308638	-0.561732	0.0300135
ENSMUSG00000026822.14	Lcn2	NA	0.490359	0.290707	0.961868	0.0417116
ENSMUSG00000026640.12	Plxna2	NA	0.490304	0.00455654	-0.465935	0.0213786
ENSMUSG00000023118.15	Sympk	NA	0.49023	4.75751e-05	-0.0796598	0.716298
ENSMUSG00000000804.14	Usp32	NA	0.489843	0.0148666	-0.433423	0.0764683
ENSMUSG00000029439.14	Sfswap	NA	0.489685	0.00105898	0.268619	0.176402
ENSMUSG00000022336.3	Eif3e	NA	0.48936	0.000294175	0.256537	0.15152
ENSMUSG00000061613.12	U2af1	NA	0.48933	0.00143095	0.52044	0.00211454
ENSMUSG00000032867.8	Fbxw8	NA	0.489152	0.00016591	-0.0214838	0.943547
ENSMUSG00000030417.15	Pdcd5	NA	0.488673	0.000936798	0.696071	4.90284e-06
ENSMUSG00000052456.9	Asna1	NA	0.488628	0.000480062	0.0578198	0.833221
ENSMUSG00000095687.1	Rnaset2a	NA	0.487715	0.033205	0.428702	0.12273
ENSMUSG00000026851.9	RP23-221O14.10	NA	0.487528	0.007052	0.0687222	0.84199
ENSMUSG00000026229.17	Psmd1	NA	0.487523	3.10093e-05	-0.207382	0.200871
ENSMUSG00000019470.12	Xab2	NA	0.487426	0.000730177	-0.1209	0.629186
ENSMUSG00000022312.11	Eif3h	NA	0.48706	7.34222e-06	0.362009	0.00428969
ENSMUSG00000063253.11	Scoc	NA	0.487011	0.0120285	-0.272598	0.306436
ENSMUSG00000040447.15	Spns2	NA	0.4869	0.0397712	0.263348	0.434447
ENSMUSG00000019854.17	Reps1	NA	0.486263	0.000203637	-0.318177	0.0552934
ENSMUSG00000017404.12	Rpl19	NA	0.486065	8.83476e-05	0.681356	1.18913e-07
ENSMUSG00000062270.13	Morf4l1	1	0.485858	3.95122e-07	0.269922	0.022775
ENSMUSG00000037149.10	Ddx1	NA	0.485801	0.000475729	-0.33237	0.0532411
ENSMUSG00000041187.16	Prkd2	NA	0.485695	0.00107147	0.483742	0.00392855
ENSMUSG00000034902.17	Pip5k1c	NA	0.485624	0.00493497	0.0679418	0.837047
ENSMUSG00000026245.16	Farsb	NA	0.485621	0.00122289	0.0838863	0.760321
ENSMUSG00000025364.13	Pa2g4	NA	0.485247	0.000544279	0.103069	0.67401
ENSMUSG00000019487.11	Trip10	NA	0.485026	0.00575694	0.620546	0.00105352
ENSMUSG00000037358.6	RP23-85G19.2	NA	0.484624	0.0296907	-0.202647	0.565663
ENSMUSG00000041130.9	Zfp598	NA	0.48462	0.00516349	0.0478529	0.893484
ENSMUSG00000047878.13	A4galt	NA	0.484295	0.267782	1.02085	0.0151795
ENSMUSG00000032127.9	Vps11	NA	0.484273	0.0081559	0.0405156	0.916952
ENSMUSG00000041328.16	Pcf11	NA	0.484119	0.00921917	-0.152684	0.620424
ENSMUSG00000031432.3	Prps1	NA	0.484031	0.0089465	0.193944	0.493531
ENSMUSG00000029474.7	Rnf34	NA	0.483449	0.0352579	-0.107303	0.789902
ENSMUSG00000002981.10	Clptm1	NA	0.483272	0.000267756	-0.340202	0.0358007
ENSMUSG00000024325.8	Ring1	NA	0.483213	0.00851925	0.192788	0.493579
ENSMUSG00000001289.12	Pfdn5	NA	0.482942	0.00165659	0.727036	3.87082e-06
ENSMUSG00000025485.13	Ric8	1	0.482527	0.0181803	-0.018565	0.968963
ENSMUSG00000038729.23	Akap2	NA	0.481948	0.00531102	-0.092432	0.76729
ENSMUSG00000033096.7	Apmap	NA	0.481884	0.00183692	0.0794622	0.781466
ENSMUSG00000025410.10	Dctn2	NA	0.481377	5.18749e-05	0.15859	0.373965
ENSMUSG00000058799.15	Nap1l1	NA	0.481145	0.000285737	0.0480087	0.857589
ENSMUSG00000025357.8	Dgka	NA	0.481096	0.00680785	0.146691	0.618852
ENSMUSG00000025381.3	Cnpy2	NA	0.480787	0.00342267	0.33013	0.111675
ENSMUSG00000033308.16	Dpyd	NA	0.480406	0.0992475	-0.809393	0.0087662
ENSMUSG00000020224.15	Llph	NA	0.480402	0.039623	0.591892	0.0201233
ENSMUSG00000024943.9	Smc5	NA	0.480304	0.00274441	-0.399963	0.0437205
ENSMUSG00000037270.18	RP23-243E17.1	NA	0.479913	0.00315722	-0.321063	0.1229
ENSMUSG00000024526.8	Cidea	NA	0.479172	0.00957703	0.330621	0.162567
ENSMUSG00000029050.15	Ski	1	0.479089	0.000587964	-0.111995	0.642005
ENSMUSG00000031137.17	Fgf13	NA	0.479089	0.0166801	-0.0597433	0.87845
ENSMUSG00000024608.10	Rps14	NA	0.479085	0.00101729	0.603732	9.71145e-05
ENSMUSG00000040731.13	Eif4h	NA	0.478676	2.60827e-06	0.0224336	0.923985
ENSMUSG00000030410.16	Dmwd	NA	0.478647	0.000393067	0.106812	0.646905
ENSMUSG00000029038.9	Ssu72	NA	0.478463	0.00399329	0.450964	0.018689
ENSMUSG00000060126.14	Tpt1	NA	0.477951	0.00656048	0.48105	0.0165653
ENSMUSG00000038733.13	Wdr26	1	0.477778	0.0223247	-0.317548	0.245571
ENSMUSG00000030982.18	AC165086.3	NA	0.477707	0.00721868	0.128473	0.669045
ENSMUSG00000029125.14	Stx18	NA	0.477445	0.0223603	-0.0575285	0.889961
ENSMUSG00000046434.16	Hnrnpa1	NA	0.477176	0.00128981	0.0630385	0.823713
ENSMUSG00000024789.12	Jak2	NA	0.477151	0.00510022	-0.118665	0.685693
ENSMUSG00000026728.9	Vim	NA	0.476973	0.0481597	0.579706	0.0317572
ENSMUSG00000038324.13	Trpc4ap	NA	0.476536	6.95871e-05	-0.00639992	0.982236
ENSMUSG00000030306.14	Tmtc1	NA	0.476503	0.0440982	-0.496644	0.071439
ENSMUSG00000034453.8	Polr3b	NA	0.4762	0.0495134	-0.140761	0.731368
ENSMUSG00000044252.17	Osbpl1a	NA	0.476146	0.0160803	-0.219007	0.453884
ENSMUSG00000022300.10	Dcaf13	NA	0.475937	0.0194448	0.00962246	0.983251
ENSMUSG00000050621.7	Rps27rt	NA	0.475877	0.0161706	0.541502	0.0144252
ENSMUSG00000039834.17	Zfp335	NA	0.475804	0.00556387	0.102567	0.736837
ENSMUSG00000024914.16	Drap1	NA	0.475645	0.0230372	0.284694	0.314712
ENSMUSG00000046711.15	Hmga1	NA	0.474832	0.000669996	0.0523304	0.851753
ENSMUSG00000014547.10	Wdfy2	NA	0.474664	0.00105971	0.0274506	0.933044
ENSMUSG00000027447.6	Cst3	NA	0.474574	7.48264e-06	0.689385	2.23719e-10
ENSMUSG00000022871.12	Fetub	NA	0.474199	0.605544	-1.92022	0.0244428
ENSMUSG00000042055.13	Wdr11	NA	0.473797	0.00658085	-0.18409	0.498344
ENSMUSG00000022801.13	Lrch3	NA	0.473614	0.00431394	-0.115616	0.686736
ENSMUSG00000051768.9	Xrcc1	NA	0.473613	0.00912907	-0.103747	0.751161
ENSMUSG00000041453.12	Rpl21	NA	0.473263	0.00274785	0.77324	1.59763e-06
ENSMUSG00000026917.15	Wdr5	NA	0.473196	0.00375333	-0.122524	0.660525
ENSMUSG00000027931.12	Npr1	NA	0.472945	0.015189	0.399133	0.0908577
ENSMUSG00000001786.14	Fbxo7	1	0.472044	0.00976531	0.0811624	0.809755
ENSMUSG00000049401.10	Ogfr	NA	0.472011	0.000596549	0.0816008	0.745726
ENSMUSG00000037296.7	Lsm1	NA	0.471648	0.222419	0.836435	0.0348341
ENSMUSG00000051403.9	Ppp1r37	NA	0.47142	0.00129874	0.099291	0.699719
ENSMUSG00000053453.9	Thoc7	NA	0.470506	0.000627018	0.265004	0.143144
ENSMUSG00000035765.9	Dym	NA	0.470006	6.804e-05	0.00461766	0.986936
ENSMUSG00000061950.17	Ppp4r1	NA	0.469961	0.0239284	0.565173	0.0149155
ENSMUSG00000001525.10	Tubb5	NA	0.46937	0.00985603	0.166694	0.562515
ENSMUSG00000011831.16	Evi5	NA	0.469062	0.0300029	-0.212366	0.517693
ENSMUSG00000039202.12	Abhd2	NA	0.468844	0.0039141	-0.12486	0.653334
ENSMUSG00000063457.14	Rps15	NA	0.46851	0.00170825	0.82062	5.86761e-08
ENSMUSG00000069769.13	Msi2	NA	0.468461	0.0412853	-0.403326	0.152946
ENSMUSG00000035107.13	Dcbld2	NA	0.468416	0.0159773	-0.521561	0.0187611
ENSMUSG00000022723.15	Crybg3	NA	0.467577	0.0104452	-0.672079	0.000538861
ENSMUSG00000021519.11	Mterf3	NA	0.467498	0.0486521	0.122758	0.762506
ENSMUSG00000032349.13	Elovl5	NA	0.467204	0.0244198	-0.444345	0.0737737
ENSMUSG00000022747.16	St3gal6	NA	0.467048	0.0031211	-0.220504	0.326209
ENSMUSG00000018567.14	Gabarap	NA	0.466163	0.00867516	0.429267	0.0399501
ENSMUSG00000009293.17	Ube2g2	NA	0.465714	0.00682837	-0.176927	0.506113
[truncated: 3,632 more rows]
